# Supplementary material for: Beyond BRCA deficiency: Clinical and molecular predictors of survival in patients with BRCA-deficient tubo-ovarian high-grade serous carcinoma
Source: Research Square preprint supplement (doi:10.21203/rs.3.rs-7572112/v1), 2025-10-03
Supplement: Supplementary file 1 [file bb59635195c145cc69fc8aa4.xlsx]

## Sheet: Contents
Supplementary material files	Description
Supplementary Table S1	Clinical data of the AOCS cohort
Supplementary Table S2	Mutation type and location germline BRCA carriers AOCS cohort
Supplementary Table S3	Associations of clinical features with overall survival using univariable and multivariable Accelerated Failure Time (AFT) models.
Supplementary Table S4	Associations of clinical features with progression-free survival using univariable and multivariable Accelerated Failure Time (AFT) models.
Supplementary Table S5	Distribution of molecular subtypes, tumor-infiltrating lymphocytes, RB1 protein expression status, and CCNE1 amplification status stratified by residual disease or no residual disease, and by gBRCApv carrier or non-carrier status.
Supplementary Table S6	Univariable and multivariable Accelerated Failure Time (AFT) model results of BRCA and neoadjuvant chemotherapy status and clinicopathological predictive features on overall survival in patients from the AOCS cohort.
Supplementary Table S7	Clinical data of the multi-omics cohort
Supplementary Table S8	Mutation location with Δ11q proportion and Δ11q BRCA1 expression
Supplementary Table S9	Results of the Kaplan–Meier analysis of overall survival in 154 patients with HGSC from the multi-omics cohort stratified by the main features of interest.
Supplementary Table S10	BRCA groups, HRD score, CHORD scores, whole genome duplication, and molecular signatures multi-omics cohort
Supplementary Table S11	Germline alterations in genes of interest with loss of wildtype allele and clonality
Supplementary Table S12	Somatic alterations in genes of interest
Supplementary Table S13	Frequency of genes identified as significant in both differential methylation and differential expression analyses.
Supplementary Table S14	NF1 alteration type, segment copy number, clonality, loss of heterozygosityand, and RNA expression.
Supplementary Table S15	Mutual exclusivity and co-occurrence analysis whole cohort
Supplementary Table S16	Mutual exclusivity and co-occurrence analysis poor survival BRCA group
Supplementary Table S17	PIK3CA segment copy number, RNA expression, and alteration type
Supplementary Table S18	RAD21 segment copy number, RNA expression, and alteration type
Supplementary Table S19	Mutation and neoantigen burden
Supplementary Table S20	Quartile odds ratios of immune cell subsets comparing poor (n=36) vs good (n=106) survival group
Supplementary Table S21	Relative CIBERSORTx abundance of LM22 cell types of the multi-omics cohort with cluster
Supplementary Table S22	Details of participating study sites and ethics approvals from the AOCS, MOCOG and OTTA cohort.

## Sheet: Supplementary Table S1
Supplementary Table S1 Clinical data of the AOCS cohort.
PublicationID	germline BRCA status	Progression-free survival (months)	Overall survival (months)	Age at diagnosis (Years)	FIGO stage	Primary site	Grade	Status	Residual disease	Neoadjuvant chemotherapy	Surgery	PARP inhibitor 1line
66232	BRCA1	119.275	290.232	46.39	III+IV	Ovary	G3	Deceased	Residual disease	No	Primary cytoreductive surgery	No
65910	wildtype	285.137	285.137	56.0575	III+IV	Ovary	G3	Deceased	Residual disease	No	Primary cytoreductive surgery	No
65962	BRCA1	52.6679	263.011	54.5	III+IV	Ovary	G3	Alive	No residual disease	No	Primary cytoreductive surgery	No
65904	wildtype	259.526	259.526	24.0356	III+IV	Ovary	G2	Alive	Residual disease	No	Primary cytoreductive surgery	No
65952	BRCA1	22.323	258.605	38.65	III+IV	Ovary	G3	Alive	Residual disease	No	Primary cytoreductive surgery	No
66034	wildtype	252.26	252.26	47.9315	III+IV	Ovary	G2	Alive	No residual disease	No	Primary cytoreductive surgery	No
66498	BRCA1	85.4456	252.096	54.69	III+IV	Ovary	G3	Alive	No residual disease	No	Primary cytoreductive surgery	No
65637	wildtype	58.0596	251.373	52.0137	I+II	Ovary	G3	Alive		No	Primary cytoreductive surgery	No
66202	wildtype	229.608	229.608	47.3562		Ovary	G3	Alive		No	Primary cytoreductive surgery	No
66689	wildtype	84.9854	229.181	62.1945	I+II	Ovary	G3	Deceased	No residual disease	No	Primary cytoreductive surgery	No
4045	BRCA1	104.974	208.239	53.85	III+IV	Fallopian tube	G3	Alive	No residual disease	No	Primary cytoreductive surgery	No
66419	BRCA1	155.078	204.557	47.97	III+IV	Fallopian tube		Alive	Residual disease	No	Primary cytoreductive surgery	No
7513	wildtype	198.277	198.277	67.8822	III+IV	Peritoneum	G3	Deceased	Residual disease	No	Primary cytoreductive surgery	No
934	wildtype	189.203	189.203	65.7233	I+II	Fallopian tube	G2	Deceased	No residual disease	No	Primary cytoreductive surgery	No
4051	wildtype	179.998	179.998	77.4137	I+II	Ovary	G3	Deceased	No residual disease	No	Primary cytoreductive surgery	No
2185	BRCA1	179.901	179.901		III+IV	Peritoneum	G3	Alive				No
2077	BRCA2	31.6274	178.718		III+IV	Ovary	G3	Deceased	Residual disease			No
65953	BRCA2	176.349	176.349	66.27	III+IV	Ovary	G3	Alive	Residual disease	No	Primary cytoreductive surgery	No
65960	BRCA2	174.015	174.015	59.9	III+IV	Ovary	G3	Alive	No residual disease	No	Primary cytoreductive surgery	No
1456	wildtype	173.752	173.752	74.8849	III+IV	Ovary	G3	Deceased	No residual disease	No	Primary cytoreductive surgery	No
2305	wildtype	16.1094	173.489	49.0384	III+IV	Ovary	G3	Deceased	Residual disease	No	Primary cytoreductive surgery	No
15266	BRCA2	116.448	170.365	39.77	III+IV	Ovary	G2	Deceased	Residual disease	No	Primary cytoreductive surgery	No
10154	BRCA2	170.102	170.102	69.7	III+IV	Ovary	G3	Alive	No residual disease	No	Primary cytoreductive surgery	No
7441	wildtype	90.673	168.82	61.6575	I+II	Ovary	G3	Deceased	No residual disease	No	Primary cytoreductive surgery	No
11759	BRCA2	55.4295	168.491	55.22		Ovary	G3	Deceased	No residual disease	No	other	No
5173	wildtype	167.867	167.867	59.8795	III+IV	Ovary	G2	Deceased	No residual disease	No	Primary cytoreductive surgery	No
4639	wildtype	69.3362	164.941	47.3562	III+IV	Ovary	G3	Deceased	No residual disease	Yes	Interval cytoreductive surgery	No
65553	wildtype	13.7752	164.941	47.7479	III+IV	Ovary	G2	Deceased	Residual disease	Yes	Interval cytoreductive surgery	No
9956	BRCA2	164.678	164.678	57.1	III+IV	Ovary	G3	Alive	No residual disease	No	Primary cytoreductive surgery	No
11136	wildtype	164.152	164.152	77.3918	III+IV	Peritoneum	G3	Deceased	Residual disease	No	Primary cytoreductive surgery	No
3374	wildtype	161.686	161.686	59.9041	III+IV	Ovary	G3	Alive	Residual disease	No	Primary cytoreductive surgery	No
11433	BRCA1	38.9585	160.7	44.91	III+IV	Ovary	G3	Alive	Residual disease	No	Primary cytoreductive surgery	No
6547	wildtype	125.193	160.108	52.7699	I+II	Ovary	G3	Alive	No residual disease	Yes	other	No
65908	BRCA1	68.3499	158.628	47.73	III+IV	Ovary	G3	Alive	Residual disease	No	Primary cytoreductive surgery	No
1819	wildtype	157.872	157.872	55.0082	III+IV	Peritoneum	G3	Alive	Residual disease	No	Primary cytoreductive surgery	No
2956	BRCA2	157.71	157.71		III+IV	Ovary	G3	Alive				No
2476	wildtype	156.459	156.459	45.7205	III+IV	Ovary	G2	Alive	Residual disease	No	Primary cytoreductive surgery	No
2262	wildtype	25.8737	154.354	48.789	III+IV	Ovary	G3	Deceased	No residual disease	No	Primary cytoreductive surgery	No
6295	BRCA1	154.19	154.19	56.69	I+II	Ovary	G3	Alive	No residual disease	No	Primary cytoreductive surgery	No
4863	wildtype	83.7361	153.697	49.4658	I+II	Ovary	G2	Deceased	No residual disease	No	Primary cytoreductive surgery	No
1897	wildtype	153.007	153.007	64.0603	III+IV	Ovary	G3	Alive	Residual disease	No	Primary cytoreductive surgery	No
4638	BRCA1	152.382	152.382	60.79	I+II	Ovary	G3	Deceased	Residual disease	No	Primary cytoreductive surgery	No
157	wildtype	15.3204	152.053	69.0082	III+IV	Ovary	G3	Alive	Residual disease	No	Primary cytoreductive surgery	No
1767	BRCA1	151.461	151.461	63.48	I+II	Fallopian tube	G3	Alive	No residual disease	No	other	No
1029	wildtype	62.4651	151.428	73.7644	III+IV	Fallopian tube	G3	Alive	Residual disease	No	Primary cytoreductive surgery	No
918	wildtype	98.103	151.1	57.4027	III+IV	Ovary	G3	Deceased	Residual disease	No	Primary cytoreductive surgery	No
3774	wildtype	46.6515	150.212	64.8795		Fallopian tube	G3	Deceased	No residual disease	No	Primary cytoreductive surgery	No
734	wildtype	27.7476	148.996	47.3068	III+IV	Ovary	G3	Alive	No residual disease	No	Primary cytoreductive surgery	No
1888	wildtype	45.4022	148.108	55.5041	III+IV	Ovary	G3	Deceased	Residual disease	No	Primary cytoreductive surgery	No
1063	wildtype	147.582	147.582	70.3507	III+IV	Ovary	G3	Alive	Residual disease	No	Primary cytoreductive surgery	No
12185	BRCA1	80.0539	147.352	44.19	III+IV	Ovary	G3	Alive	Residual disease	No	Primary cytoreductive surgery	No
1103	wildtype	147.286	147.286	45.6164	III+IV	Ovary	G3	Alive	No residual disease	No	Primary cytoreductive surgery	No
12075	wildtype	60.098	147.187	63.2411	III+IV	Ovary	G3	Deceased	No residual disease	No	Primary cytoreductive surgery	No
1654	BRCA1	143.571	146.267	64.04	I+II	Ovary	G3	Deceased	No residual disease	No	Primary cytoreductive surgery	No
4374	wildtype	44.0214	146.234	77.5808	III+IV	Ovary	G3	Alive	Residual disease	No	Primary cytoreductive surgery	No
8924	wildtype	12.6245	146.135	58.1918	I+II	Ovary	G3	Deceased	No residual disease	No	Primary cytoreductive surgery	No
66200	BRCA2	36.0325	145.839	50.32		Ovary	G2	Alive	Residual disease	Yes	Interval cytoreductive surgery	No
5693	BRCA1	16.7341	145.182	68.61	III+IV	Ovary	G2	Deceased	Residual disease	No	Primary cytoreductive surgery	No
4689	wildtype	32.2846	145.149	48.4137	III+IV	Ovary	G3	Deceased	No residual disease	No	Primary cytoreductive surgery	No
1880	BRCA1	144.919	144.919	50.09	I+II	Fallopian tube	G3	Deceased	No residual disease	No	Primary cytoreductive surgery	No
1064	wildtype	144.623	144.623	62.789	III+IV	Ovary	G3	Alive		No	Primary cytoreductive surgery	No
2400	BRCA1	14.3341	144.459	51.96	III+IV	Ovary	G3	Deceased	Residual disease	Yes	Interval cytoreductive surgery	No
9538	BRCA2	17.6875	143.538	61.95	III+IV	Ovary	G3	Alive	Residual disease	No	Primary cytoreductive surgery	No
6483	wildtype	86.6621	143.44	54.5644	III+IV	Ovary	G3	Alive	Residual disease	No	Primary cytoreductive surgery	No
2687	BRCA2	25.0521	143.277		III+IV	Ovary	G3	Deceased	Residual disease			No
1386	BRCA1	142.914	142.914	70.76	III+IV	Ovary	G3	Alive	Residual disease	No	Primary cytoreductive surgery	No
2846	BRCA1	142.453	142.453	55.54	III+IV	Ovary	G3	Alive	Residual disease	No	Primary cytoreductive surgery	No
1608	wildtype	76.9307	141.829	48.2548	III+IV	Ovary	G3	Deceased		No	Primary cytoreductive surgery	No
66643	wildtype	141.796	141.796	67.7205		Peritoneum		Alive	No residual disease	Yes	Interval cytoreductive surgery	No
1493	wildtype	63.6157	141.664	53.0986	III+IV	Ovary	G2	Deceased		No	Primary cytoreductive surgery	No
4757	BRCA2	141.072	141.072	46.57	III+IV	Ovary	G2	Alive	Residual disease	No	Primary cytoreductive surgery	No
3903	BRCA2	60.098	140.974	51.52	III+IV	Ovary	G3	Alive	Residual disease	No	Primary cytoreductive surgery	No
1203	wildtype	140.809	140.809	58.1397	III+IV	Ovary	G2	Alive	Residual disease	No	Primary cytoreductive surgery	No
3690	wildtype	62.4322	140.612	54.6959	III+IV	Ovary	G2	Alive	Residual disease	No	Primary cytoreductive surgery	No
2315	BRCA1	140.02	140.02	45.08	III+IV	Peritoneum	G3	Alive	No residual disease	No	Primary cytoreductive surgery	No
2835	BRCA2	139.956	139.956		III+IV	Peritoneum	G3	Alive	No residual disease			No
3042	wildtype	139.955	139.955	58.2548	I+II	Ovary	G3	Alive	No residual disease	No	other	No
5102	wildtype	139.955	139.955	74.3014	III+IV	Peritoneum	G3	Deceased	Residual disease	No	Primary cytoreductive surgery	No
1242	wildtype	31.7257	139.33	64.8712	III+IV	Ovary	G3	Deceased		No	Primary cytoreductive surgery	No
4535	wildtype	6.34514	139.1	64.0822	III+IV	Peritoneum	G3	Alive	No residual disease	No	Primary cytoreductive surgery	No
2797	wildtype	72.7225	138.837	63.789	III+IV	Ovary	G3	Deceased	Residual disease	No	Primary cytoreductive surgery	No
11186	BRCA1	138.804	138.804	52.45	I+II	Ovary	G3	Alive	No residual disease	No	Primary cytoreductive surgery	No
2083	BRCA1	138.508	138.508	49.08	I+II	Fallopian tube	G3	Alive	No residual disease	No	other	No
11866	wildtype	88.5031	138.475	67.0493	III+IV	Peritoneum	G3	Deceased	Residual disease	No	Primary cytoreductive surgery	No
3771	wildtype	138.114	138.114	58.3699	I+II	Ovary	G3	Alive	No residual disease	Yes	Interval cytoreductive surgery	No
66036	wildtype	41.5228	138.114	71.9836	III+IV	Ovary	G2	Alive	No residual disease	No	Primary cytoreductive surgery	No
65636	wildtype	73.7088	137.456	75.189	III+IV	Ovary		Deceased	No residual disease	Yes	Interval cytoreductive surgery	No
1617	BRCA1	86.6292	137.292	45.24	III+IV	Ovary	G3	Deceased	No residual disease	No	Primary cytoreductive surgery	No
3691	BRCA2	136.93	136.93	48.38	I+II	Ovary	G3	Alive	No residual disease	No	other	No
2987	wildtype	136.568	136.568	74.0247	III+IV	Ovary	G3	Alive	No residual disease	No	Primary cytoreductive surgery	No
9082	wildtype	95.5387	135.385	49.3342	III+IV	Ovary	G2	Deceased	Residual disease	No	Primary cytoreductive surgery	No
2947	wildtype	135.319	135.319	57.0411	I+II	Peritoneum	G3	Alive	No residual disease	No	Primary cytoreductive surgery	No
2738	wildtype	135.22	135.22	55.6274	I+II	Ovary	G3	Alive	No residual disease	No	Primary cytoreductive surgery	No
1072	wildtype	134.957	134.957	75.3753	I+II	Ovary		Deceased	No residual disease	No	Primary cytoreductive surgery	No
8781	wildtype	74.2019	134.826	52.9562	III+IV	Ovary	G3	Alive	Residual disease	No	Primary cytoreductive surgery	No
65951	wildtype	58.224	134.727	59.4795	III+IV	Ovary	G3	Alive	Residual disease	No		No
5129	BRCA2	20.0217	134.366	55.62	III+IV	Ovary	G3	Deceased	Residual disease	No	Primary cytoreductive surgery	No
7438	BRCA1	63.7144	133.708	57.84	III+IV	Ovary	G2	Alive	Residual disease	No	Primary cytoreductive surgery	No
3249	wildtype	133.215	133.215	68.8137	I+II	Ovary	G2	Alive	Residual disease	No	Primary cytoreductive surgery	No
9006	wildtype	96.6565	133.215	55.8219	III+IV	Ovary	G3	Alive	Residual disease	No	Primary cytoreductive surgery	No
899	wildtype	132.886	132.886	51.674	I+II	Ovary	G3	Deceased	No residual disease	No	Primary cytoreductive surgery	No
9125	wildtype	132.788	132.788	52.274	III+IV	Ovary	G2	Deceased	No residual disease	No	Primary cytoreductive surgery	No
6708	BRCA1	41.9831	132.59	46.13	III+IV	Ovary	G3	Alive	No residual disease	No	Primary cytoreductive surgery	No
10266	wildtype	49.0515	132.459	64.2575	III+IV	Ovary	G3	Deceased	No residual disease	No	Primary cytoreductive surgery	No
4894	BRCA2	132.294	132.294	57.13	I+II	Ovary	G3	Alive	No residual disease	No	Primary cytoreductive surgery	No
4799	wildtype	81.0073	131.473	76.1452	III+IV	Ovary	G3	Deceased	No residual disease	No	Primary cytoreductive surgery	No
5232	wildtype	131.44	131.44	67.7151	III+IV	Peritoneum	G3	Alive	Residual disease	No	Primary cytoreductive surgery	No
9374	BRCA1	130.355	130.355	48.71	III+IV	Ovary	G2	Deceased	Residual disease	No	Primary cytoreductive surgery	No
15408	wildtype	129.894	129.894	64.9068	III+IV	Ovary	G2	Deceased	No residual disease	No	Primary cytoreductive surgery	No
66644	BRCA2	50.5638	129.73	61.74	III+IV	Ovary	G3	Deceased	Residual disease	No	Primary cytoreductive surgery	No
4391	wildtype	35.9339	129.533	64.1699	III+IV	Ovary	G2	Alive	Residual disease	No	Primary cytoreductive surgery	No
9675	wildtype	129.434	129.434	73.8877	III+IV	Ovary	G2	Alive	Residual disease	No	Primary cytoreductive surgery	No
9850	BRCA2	66.3445	129.073	75.95	III+IV	Fallopian tube	G3	Deceased	Residual disease	No	other	No
11496	wildtype	26.7614	128.974	40.9479	III+IV	Ovary	G2	Deceased	Residual disease	No	Primary cytoreductive surgery	No
8105	wildtype	128.645	128.645	45.5671	I+II	Ovary	G2	Deceased	No residual disease	No	Primary cytoreductive surgery	No
66189	wildtype	76.6677	128.579	54.0795	III+IV	Ovary	G2	Deceased		No	Primary cytoreductive surgery	No
10809	wildtype	128.514	128.514	61.6082	III+IV	Ovary	G3	Alive	Residual disease	No	Primary cytoreductive surgery	No
6296	wildtype	128.218	128.218	47.7205	III+IV	Ovary	G3	Alive	No residual disease	No	Primary cytoreductive surgery	No
2563	wildtype	127.79	127.79	38.9973	III+IV	Ovary	G3	Alive	No residual disease	Yes	other	No
5851	wildtype	17.1615	127.758	53.6493	III+IV	Peritoneum	G3	Alive	No residual disease	Yes	Interval cytoreductive surgery	No
11097	wildtype	57.8295	127.626	56.337	III+IV	Ovary	G3	Alive	Residual disease	No	Primary cytoreductive surgery	No
6520	wildtype	77.8183	127.199	67.0932	III+IV	Ovary	G2	Alive	Residual disease	No	Primary cytoreductive surgery	No
11275	wildtype	44.5475	127.199	69.4055	III+IV	Ovary	G3	Deceased	Residual disease	No	Primary cytoreductive surgery	No
66652	BRCA1	39.3201	126.837	50.29	III+IV	Ovary	G3	Deceased	No residual disease	No	Primary cytoreductive surgery	No
2428	BRCA2	23.211	126.74		III+IV	Ovary	G3	Deceased	Residual disease			No
9518	wildtype	83.8018	126.508	67.0055	III+IV	Ovary	G2	Deceased	No residual disease	No	Primary cytoreductive surgery	No
2187	BRCA1	18.2464	125.653	64.38	III+IV	Ovary	G3	Deceased	Residual disease	No	Primary cytoreductive surgery	No
7585	wildtype	40.405	125.653	73.6466	III+IV	Peritoneum	G3	Alive	No residual disease	No	Primary cytoreductive surgery	No
2285	wildtype	125.226	125.226	56.9671	III+IV	Ovary	G3	Deceased	No residual disease	No	Primary cytoreductive surgery	No
5510	wildtype	16.5697	125.193	60.8411	III+IV	Ovary	G3	Deceased	Residual disease	No	Primary cytoreductive surgery	No
1033	wildtype	15.5505	124.996	40.4438	III+IV	Ovary	G2	Deceased	Residual disease	No	Primary cytoreductive surgery	No
66031	BRCA2	124.832	124.832	57.32	III+IV	Ovary	G2	Alive	Residual disease	No	Primary cytoreductive surgery	No
5619	BRCA2	124.503	124.503	45.92	III+IV	Ovary	G3	Alive	Residual disease	No	Primary cytoreductive surgery	No
8026	wildtype	30.9366	124.338	44.6329	I+II	Ovary	G2	Alive	No residual disease	No	Primary cytoreductive surgery	No
8424	BRCA1	118.947	124.24	54.55	III+IV	Ovary	G3	Alive	Residual disease	No	Primary cytoreductive surgery	No
4941	wildtype	124.174	124.174	67.3151	I+II	Ovary	G3	Alive	No residual disease	No	other	No
6222	wildtype	123.977	123.977	74.3644	III+IV	Fallopian tube	G3	Alive	Residual disease	No	Primary cytoreductive surgery	No
6497	wildtype	123.845	123.845	74.3096	I+II	Peritoneum	G3	Alive	No residual disease	No	Primary cytoreductive surgery	No
6463	wildtype	123.812	123.812	58.9863	III+IV	Ovary	G3	Alive	Residual disease	No	Primary cytoreductive surgery	No
7550	wildtype	26.8929	123.812	58.6521	III+IV	Ovary	G3	Alive	No residual disease	No	Primary cytoreductive surgery	No
10258	wildtype	123.615	123.615	58.8822	III+IV	Ovary	G3	Alive	No residual disease	No	Primary cytoreductive surgery	No
9219	wildtype	120.59	123.484	51.3288	III+IV	Ovary	G3	Alive	No residual disease	No	Primary cytoreductive surgery	No
7713	wildtype	76.9635	123.418	59.0384	III+IV	Ovary	G3	Alive	No residual disease	No	Primary cytoreductive surgery	No
8836	BRCA2	123.188	123.188	58.96	III+IV	Ovary	G3	Alive	Residual disease	No	Primary cytoreductive surgery	No
11731	BRCA2	6.96979	122.925	60.05	III+IV	Ovary	G3	Alive	Residual disease	No	Primary cytoreductive surgery	No
1607	wildtype	37.0188	122.793	52.1096	III+IV	Ovary	G3	Deceased	Residual disease	No	Primary cytoreductive surgery	No
11024	wildtype	107.933	122.3	69.3452	III+IV	Ovary	G3	Alive	Residual disease	No	Primary cytoreductive surgery	No
8690	BRCA1	121.938	121.938	63.83	III+IV	Ovary	G3	Alive	No residual disease	No	Primary cytoreductive surgery	No
5349	wildtype	121.906	121.906	69.8822	I+II	Ovary	G2	Deceased	No residual disease	No	Primary cytoreductive surgery	No
11539	wildtype	52.7665	121.051	69.1068	III+IV	Peritoneum	G3	Alive	Residual disease	No	other	No
11724	wildtype	105.862	120.788	67.9205	III+IV	Ovary	G3	Alive	Residual disease	No	Primary cytoreductive surgery	No
10590	wildtype	20.9751	120.525	62.0356	III+IV	Fallopian tube	G3	Alive	No residual disease	Yes	Interval cytoreductive surgery	No
66038	wildtype	120.492	120.492	57.5425	III+IV	Ovary	G3	Alive	No residual disease	No	Primary cytoreductive surgery	No
11272	wildtype	120.327	120.327	52.9945	I+II	Ovary	G3	Alive	No residual disease	No	Primary cytoreductive surgery	No
11935	wildtype	58.0925	120.229	77.6247	III+IV	Fallopian tube	G3	Deceased	Residual disease	No	Primary cytoreductive surgery	No
8555	wildtype	120.163	120.163	59.9123	I+II	Ovary		Alive	No residual disease	No	Primary cytoreductive surgery	No
9731	wildtype	49.3145	119.67	58.8356	III+IV	Ovary	G3	Deceased	No residual disease	No	Primary cytoreductive surgery	No
66106	wildtype	119.538	119.538	61.1151		Ovary	G3	Alive		No		No
6801	wildtype	119.275	119.275	64.2685	I+II	Ovary	G3	Alive	No residual disease	No	Primary cytoreductive surgery	No
66350	BRCA2	77.2266	119.111	64.76	III+IV	Ovary	G3	Alive	No residual disease	Yes	Interval cytoreductive surgery	No
8473	BRCA1	65.7527	118.914	52.12	III+IV	Ovary	G3	Alive	Residual disease	No	Primary cytoreductive surgery	No
5960	wildtype	118.881	118.881	65.4849	I+II	Ovary	G3	Alive	No residual disease	No	Primary cytoreductive surgery	No
15395	wildtype	118.223	118.223	78.1205		Fallopian tube	G3	Deceased	No residual disease	No	Primary cytoreductive surgery	No
66095	wildtype	88.6346	118.092	55.5233		Ovary	G3	Alive		No		No
12080	wildtype	118.026	118.026	77.263	III+IV	Peritoneum		Deceased		No	Primary cytoreductive surgery	No
66035	BRCA2	34.8161	117.763	66.87	III+IV	Ovary	G3	Alive	Residual disease	Yes	Interval cytoreductive surgery	No
5690	BRCA1	117.664	117.664	52.55	I+II	Ovary		Alive	No residual disease	No	Primary cytoreductive surgery	No
9364	wildtype	117.434	117.434	63.7178		Ovary	G3	Deceased	No residual disease	No	Primary cytoreductive surgery	No
6986	wildtype	23.0463	117.237	73.1589	III+IV	Ovary	G3	Deceased	No residual disease	No	Primary cytoreductive surgery	No
7328	wildtype	30.5421	117.106	61.0164	III+IV	Ovary	G3	Deceased	Residual disease	No	Primary cytoreductive surgery	No
65584	wildtype	116.908	116.908	39.411	III+IV	Fallopian tube	G3	Alive	No residual disease	Yes	Interval cytoreductive surgery	No
2251	wildtype	116.908	116.908	60.2658	I+II	Fallopian tube	G3	Alive	No residual disease	No	Primary cytoreductive surgery	No
66683	wildtype	99.451	116.908	64.9507	III+IV	Ovary	G3	Deceased	Residual disease	No	Primary cytoreductive surgery	No
15396	wildtype	25.5778	116.744	46.4329	III+IV	Ovary	G3	Deceased	Residual disease	No	Primary cytoreductive surgery	No
12336	wildtype	64.4705	116.481	50.2712	III+IV	Ovary	G3	Alive	Residual disease	Yes	Interval cytoreductive surgery	No
11169	wildtype	116.185	116.185	44.2329	III+IV	Fallopian tube	G3	Alive	No residual disease	Yes	Interval cytoreductive surgery	No
65890	BRCA1	116.185	116.185	56.62	III+IV	Peritoneum	G3	Alive	Residual disease	No	Primary cytoreductive surgery	No
469	wildtype	40.0763	114.837	57.6521	III+IV	Ovary	G3	Deceased	Residual disease	No	Primary cytoreductive surgery	No
4853	BRCA1	57.4021	114.673	37.48	I+II	Fallopian tube	G3	Deceased	Residual disease	No	other	No
471	wildtype	19.5614	114.574	78.5534		Ovary	G3	Deceased		Yes	Interval cytoreductive surgery	No
11333	wildtype	114.508	114.508	49.5753	III+IV	Ovary	G3	Alive		Yes	Interval cytoreductive surgery	No
11293	wildtype	114.443	114.443	77.1918	III+IV	Fallopian tube	G3	Alive	Residual disease	No	Primary cytoreductive surgery	No
2044	wildtype	104.514	113.917	55.211	III+IV	Ovary	G2	Deceased	Residual disease	No	Primary cytoreductive surgery	No
10205	BRCA1	2.30134	113.621	71.68	III+IV	Ovary	G2	Deceased	Residual disease	No	Primary cytoreductive surgery	No
3778	wildtype	27.6161	113.555	48.2164	I+II	Ovary	G3	Alive	No residual disease	No	Primary cytoreductive surgery	No
3572	wildtype	113.456	113.456	56.1589	I+II	Ovary	G2	Alive	No residual disease	No	other	No
65955	BRCA2	24.5586	112.832	57.51	III+IV	Ovary	G3	Alive	Residual disease	No	Primary cytoreductive surgery	No
7181	BRCA2	64.865	112.766	60.43	III+IV	Ovary	G3	Deceased	No residual disease	Yes	Interval cytoreductive surgery	No
11451	wildtype	112.371	112.371	52.5918	I+II	Ovary	G2	Alive		No	Primary cytoreductive surgery	No
3268	BRCA2	70.9143	112.043	60.05	I+II	Ovary	G3	Deceased	Residual disease	No	Primary cytoreductive surgery	No
8456	BRCA1	64.4705	111.451	57.89	III+IV	Ovary	G2	Deceased	Residual disease	No	Primary cytoreductive surgery	No
9579	wildtype	17.1943	111.352	59.8493	III+IV	Ovary	G3	Deceased	No residual disease	No	Primary cytoreductive surgery	No
11172	wildtype	110.53	110.53	61.3671	III+IV	Ovary	G3	Alive		No	Primary cytoreductive surgery	No
66277	wildtype	56.0213	110.169	60.9562	III+IV	Ovary	G3	Alive		No	other	No
8898	wildtype	110.103	110.103	53.6027	I+II	Peritoneum	G2	Alive	No residual disease	No	other	No
66329	wildtype	27.5504	109.971	59.1863	III+IV	Ovary	G3	Alive	Residual disease	No	Primary cytoreductive surgery	No
3793	wildtype	37.3147	108.886	42.5233	I+II	Ovary	G3	Deceased	No residual disease	No	Primary cytoreductive surgery	No
66011	wildtype	108.689	108.689	73.811		Fallopian tube	G3	Alive		No	Primary cytoreductive surgery	No
12100	wildtype	108.163	108.163	55.9041	I+II	Ovary	G3	Alive	No residual disease	No	Primary cytoreductive surgery	No
11232	wildtype	18.1806	107.604	64.274	III+IV	Peritoneum	G3	Deceased	No residual disease	Yes	Interval cytoreductive surgery	No
11521	wildtype	107.539	107.539	68.4356	III+IV	Ovary	G3	Alive	No residual disease	No	Primary cytoreductive surgery	No
11381	wildtype	25.8079	107.506	49.9918	I+II	Ovary	G3	Alive	Residual disease	No	Primary cytoreductive surgery	No
6065	wildtype	28.7668	107.243	60.4521	III+IV	Ovary	G2	Deceased	No residual disease	No	Primary cytoreductive surgery	No
66663	wildtype	57.0076	107.078	61.2329	III+IV	Ovary	G3	Deceased	No residual disease	No	Primary cytoreductive surgery	No
65645	wildtype	17.9176	107.045	44.9452	III+IV	Ovary	G3	Deceased	Residual disease	Yes	Interval cytoreductive surgery	No
66743	BRCA2	31.1997	106.782	53.34	III+IV	Ovary	G3	Alive	No residual disease	No	Primary cytoreductive surgery	No
66736	BRCA2	27.0244	106.552	55.05	III+IV	Ovary	G2	Alive	Residual disease	No	Primary cytoreductive surgery	No
4406	BRCA2	34.4873	106.388	63.11	III+IV	Peritoneum	G3	Deceased	Residual disease	No	Primary cytoreductive surgery	No
12350	wildtype	106.388	106.388	41.5425	I+II	Ovary	G2	Alive	No residual disease	No	Primary cytoreductive surgery	No
66014	wildtype	105.697	105.697	53.7233	III+IV	Ovary	G3	Alive	No residual disease	No	Primary cytoreductive surgery	No
10461	wildtype	15.0574	105.237	62.3534	III+IV	Ovary	G3	Deceased	Residual disease	No	Primary cytoreductive surgery	No
8516	wildtype	18.7395	105.139	58.9342	III+IV	Fallopian tube	G2	Deceased	Residual disease	No	Primary cytoreductive surgery	No
66729	wildtype	56.2843	104.974	70.0959		Ovary		Deceased		No	other	No
8389	wildtype	42.5749	104.941	65.1589	III+IV	Ovary	G3	Deceased	No residual disease	Yes	Interval cytoreductive surgery	No
12154	wildtype	55.561	104.58	48.5178	III+IV	Ovary	G3	Deceased	Residual disease	No	Primary cytoreductive surgery	No
11972	wildtype	104.284	104.284	58.9205	I+II	Fallopian tube	G3	Alive	No residual disease	No	Primary cytoreductive surgery	No
4985	wildtype	80.8758	104.218	68.3397	III+IV	Ovary	G3	Alive	Residual disease	No	Primary cytoreductive surgery	No
6486	BRCA2	103.593	103.593	71.97	III+IV	Ovary	G3	Deceased	Residual disease	No	Primary cytoreductive surgery	No
12048	BRCA2	103.528	103.528	43.56	III+IV	Ovary	G3	Deceased	Residual disease	No	Primary cytoreductive surgery	No
66334	BRCA2	102.607	102.607	63.01	III+IV	Ovary	G3	Alive	No residual disease	No	Primary cytoreductive surgery	Yes
9150	wildtype	42.8379	102.574	69.9616	III+IV	Ovary	G2	Deceased	No residual disease	No	Primary cytoreductive surgery	No
3124	wildtype	31.2983	101.128	32.2548	III+IV	Peritoneum	G2	Deceased	No residual disease	No	Primary cytoreductive surgery	No
12097	wildtype	100.667	100.667	63.6932		Ovary	G3	Alive	No residual disease	No	Primary cytoreductive surgery	No
15290	BRCA1	26.0052	100.536	56.88	I+II	Ovary	G3	Alive	No residual disease	No	Primary cytoreductive surgery	No
5403	BRCA1	25.6436	100.47	59.68	III+IV	Peritoneum	G2	Deceased	Residual disease	No	Primary cytoreductive surgery	No
3158	BRCA1	10.3232	100.339	62.18	III+IV	Ovary	G3	Deceased	Residual disease	No	Primary cytoreductive surgery	No
2095	wildtype	99.5496	99.5496	79.9699	III+IV	Fallopian tube	G3	Deceased	No residual disease	No	Primary cytoreductive surgery	No
7554	wildtype	12.9533	99.4181	39.7425		Ovary	G3	Deceased	Residual disease	Yes	Interval cytoreductive surgery	No
15294	wildtype	64.7993	99.0564	72.737	III+IV	Ovary	G3	Deceased	Residual disease	Yes	Interval cytoreductive surgery	No
66009	wildtype	9.041	99.0236	64.6027	III+IV	Fallopian tube	G2	Alive	No residual disease	No	Primary cytoreductive surgery	No
15400	wildtype	30.049	98.9578	60.811	III+IV	Ovary	G3	Deceased	No residual disease	No	Primary cytoreductive surgery	No
66187	BRCA1	3.58352	98.8592	63.89	I+II	Ovary	G3	Deceased	No residual disease	No	Primary cytoreductive surgery	No
10976	wildtype	19.5286	98.366	60.2164	III+IV	Ovary	G3	Deceased	Residual disease	No	Primary cytoreductive surgery	No
15333	BRCA2	98.2674	98.2674	54.31	III+IV	Ovary	G3	Alive	Residual disease	No	Primary cytoreductive surgery	No
8333	wildtype	22.4217	98.1688	75.5288	III+IV	Ovary	G2	Deceased	Residual disease	Yes	Interval cytoreductive surgery	No
10463	wildtype	16.5368	97.9387	58.7562	III+IV	Ovary	G2	Deceased	Residual disease	No	Primary cytoreductive surgery	No
3122	wildtype	32.4161	97.7743	66.4027	I+II	Ovary	G3	Deceased	No residual disease	No	Primary cytoreductive surgery	No
66178	wildtype	75.2868	97.3469	60.4986	III+IV	Fallopian tube	G3	Alive	No residual disease	No	Primary cytoreductive surgery	No
6336	wildtype	31.1668	97.051	50.1616	III+IV	Ovary	G3	Deceased	No residual disease	No	Primary cytoreductive surgery	No
15322	wildtype	55.1665	96.7551	50.8438	III+IV	Ovary	G3	Deceased	No residual disease	No	Primary cytoreductive surgery	No
66717	wildtype	17.5231	96.3606	70.0164		Ovary	G3	Deceased	Residual disease	Yes	Interval cytoreductive surgery	No
66647	wildtype	35.9339	96.2948	48.7205	III+IV	Ovary	G3	Alive	Residual disease	No	Primary cytoreductive surgery	No
9336	wildtype	38.2023	96.2291	69.0548	III+IV	Peritoneum	G2	Deceased	No residual disease	Yes	Interval cytoreductive surgery	No
8928	BRCA1	32.3832	96.0647	53.4	III+IV	Ovary	G3	Deceased	No residual disease	No	Primary cytoreductive surgery	No
9077	BRCA2	59.9007	95.8017	63.98	III+IV	Peritoneum	G2	Deceased	Residual disease	No	Primary cytoreductive surgery	No
15253	BRCA1	13.5779	95.7031	51.46	III+IV	Ovary	G3	Alive	Residual disease	No	Primary cytoreductive surgery	No
933	wildtype	28.3723	95.44	50.2164	I+II	Fallopian tube	G3	Deceased	No residual disease	No	other	No
65588	BRCA1	44.4817	95.4072	38.21	III+IV	Ovary	G3	Deceased	Residual disease	No	Primary cytoreductive surgery	No
3644	BRCA1	24.6573	95.177	59.55	I+II	Fallopian tube	G3	Alive	No residual disease	No	Primary cytoreductive surgery	No
3333	wildtype	95.0455	95.0455	68.8384	III+IV	Ovary	G3	Deceased	No residual disease	No	Primary cytoreductive surgery	No
7710	wildtype	8.97524	94.914	60.2411	I+II	Ovary	G2	Deceased	No residual disease	No	Primary cytoreductive surgery	No
15216	BRCA1	51.7145	94.651	56.53	III+IV	Ovary	G3	Deceased	Residual disease	No	Primary cytoreductive surgery	No
66345	wildtype	49.2817	94.5195	62.7014	III+IV	Ovary	G3	Alive	No residual disease	No	Primary cytoreductive surgery	No
296	wildtype	24.986	93.4017	47.1315	III+IV	Ovary	G3	Deceased	No residual disease	No	Primary cytoreductive surgery	No
10810	wildtype	53.72	93.2045	68.9452	III+IV	Ovary	G3	Deceased	Residual disease	No	Primary cytoreductive surgery	No
15257	BRCA1	29.6873	93.1716	53.62	III+IV	Ovary	G3	Deceased	No residual disease	No	Primary cytoreductive surgery	No
688	wildtype	93.1058	93.1058	74.926	III+IV	Fallopian tube	G3	Deceased	No residual disease	No	Primary cytoreductive surgery	No
12071	wildtype	33.0079	93.1058	50.7096	III+IV	Ovary	G3	Deceased	Residual disease	No	Primary cytoreductive surgery	No
66172	BRCA2	35.3092	93.073	52.72	I+II	Ovary	G3	Deceased	No residual disease	No	Primary cytoreductive surgery	No
7202	BRCA2	30.4106	93.0072	60.89	III+IV	Peritoneum	G3	Deceased	No residual disease	No	Primary cytoreductive surgery	No
2948	wildtype	17.6546	92.6456	70.8411	III+IV	Peritoneum	G3	Deceased	Residual disease	No	Primary cytoreductive surgery	No
1642	wildtype	24.8874	91.3634	61.4685	I+II	Ovary	G3	Deceased	No residual disease	No	Primary cytoreductive surgery	No
65642	BRCA2	78.2128	91.199	65.28		Ovary		Deceased	No residual disease	Yes	other	No
10588	wildtype	91.0017	91.0017	75.1726	I+II	Ovary	G3	Deceased	No residual disease	No	Primary cytoreductive surgery	No
6212	wildtype	37.6105	90.8045	56.1041	III+IV	Ovary	G2	Deceased	No residual disease	No	Primary cytoreductive surgery	No
1228	wildtype	90.3113	90.3113	76.4027	III+IV	Ovary	G2	Alive	No residual disease	No	Primary cytoreductive surgery	No
66794	wildtype	55.5939	90.2785	55.6466	I+II	Ovary	G3	Deceased	No residual disease	No	Primary cytoreductive surgery	No
65710	wildtype	13.9724	90.147	53.6986	III+IV	Ovary	G3	Deceased	No residual disease	No	other	No
65618	BRCA2	26.6627	89.6538	66.65	III+IV	Ovary	G3	Deceased	Residual disease	No	Primary cytoreductive surgery	No
65956	wildtype	89.5223	89.5223	78.5699	III+IV	Ovary	G3	Alive	No residual disease	Yes	Interval cytoreductive surgery	No
66274	wildtype	29.1942	89.4894	51.9644	III+IV	Ovary	G3	Alive		No		No
8561	wildtype	25.2162	88.9634	54.8904	III+IV	Ovary	G3	Deceased	Residual disease	No	other	No
11480	wildtype	88.9305	88.9305	68.5205	III+IV	Ovary	G3	Deceased	Residual disease	No	Primary cytoreductive surgery	No
15251	wildtype	13.0848	88.6675	70.726	III+IV	Peritoneum	G3	Deceased		No	Primary cytoreductive surgery	No
10873	wildtype	22.323	88.5689	59.6466	III+IV	Peritoneum	G3	Deceased	Residual disease	No	Primary cytoreductive surgery	No
65543	BRCA1	88.2401	88.2401	41.07	III+IV	Ovary	G3	Alive	Residual disease	Yes	Interval cytoreductive surgery	No
606	wildtype	25.9723	88.01	55.9452	III+IV	Ovary	G2	Deceased	Residual disease	No	other	No
6775	wildtype	16.1423	87.9771	51.1014	III+IV	Ovary	G2	Deceased	Residual disease	Yes	Interval cytoreductive surgery	No
1761	wildtype	18.5423	87.3196	67.0658	III+IV	Ovary	G3	Deceased	Residual disease	No	Primary cytoreductive surgery	No
8947	wildtype	23.671	87.1223	56.537	III+IV	Ovary	G3	Deceased	Residual disease	No	Primary cytoreductive surgery	No
6268	wildtype	86.9908	86.9908	64.1205	I+II	Fallopian tube	G3	Alive	No residual disease	Yes	other	No
2736	BRCA1	86.9251	86.9251	59.5	I+II	Fallopian tube	G3	Alive	No residual disease	No	other	No
543	BRCA1	86.7607	86.7607	57.42	I+II	Ovary	G3	Deceased	No residual disease	No	Primary cytoreductive surgery	No
12069	wildtype	23.9997	86.6949	76.2795	III+IV	Peritoneum		Deceased	Residual disease	No	other	No
4451	wildtype	40.7009	86.5306	53.1589	III+IV	Ovary	G3	Deceased	Residual disease	Yes	Interval cytoreductive surgery	No
11306	wildtype	11.1451	86.4319	65.0329	III+IV	Ovary	G3	Deceased	Residual disease	No	Primary cytoreductive surgery	No
66426	wildtype	51.9118	86.1032	64.5342	III+IV	Ovary	G3	Alive	No residual disease	Yes	Interval cytoreductive surgery	No
4841	wildtype	11.0793	86.1032	61.4082	III+IV	Ovary	G2	Deceased	Residual disease	No	Primary cytoreductive surgery	No
8471	BRCA1	78.7717	85.8402	44.68	III+IV	Ovary	G3	Alive	Residual disease	No	Primary cytoreductive surgery	No
66185	wildtype	15.156	85.7744	61.411		Ovary	G3	Deceased		No	Primary cytoreductive surgery	No
65552	wildtype	23.408	85.2155	60.4685	III+IV	Ovary	G3	Alive	No residual disease	Yes	Interval cytoreductive surgery	No
11170	wildtype	85.1498	85.1498	67.2027	III+IV	Ovary	G2	Alive		No	Primary cytoreductive surgery	No
11766	wildtype	14.2355	85.1169	64.6767	III+IV	Ovary	G3	Deceased	Residual disease	No	Primary cytoreductive surgery	No
66180	BRCA1	18.6409	84.5909	59.4	III+IV	Fallopian tube	G3	Alive	No residual disease	No	other	No
66130	BRCA1	25.3148	83.9991	54.34	III+IV	Peritoneum	G3	Alive	No residual disease	No	Primary cytoreductive surgery	No
958	BRCA2	19.9888	83.9991	60.36	III+IV	Ovary	G2	Deceased	Residual disease	Yes	Interval cytoreductive surgery	No
5589	BRCA1	19.3313	83.9662	51.42	III+IV	Ovary	G3	Deceased	No residual disease	No	Primary cytoreductive surgery	No
2625	wildtype	11.178	83.4731	59.2548	III+IV	Ovary	G2	Deceased	Residual disease	No	Primary cytoreductive surgery	No
66739	BRCA2	13.3149	82.6183	51.93	III+IV	Ovary	G3	Alive	Residual disease	No	Primary cytoreductive surgery	No
66575	wildtype	82.5525	82.5525	58.0274	III+IV	Ovary	G3	Alive	No residual disease	No	Primary cytoreductive surgery	No
11752	wildtype	14.1697	82.5525	62.3589	III+IV	Ovary	G3	Deceased	Residual disease	No	Primary cytoreductive surgery	No
11519	wildtype	19.1669	82.4868	59.5753	III+IV	Ovary	G3	Deceased	Residual disease	No	Primary cytoreductive surgery	No
66022	BRCA2	56.1857	82.4539	63.22	III+IV	Ovary	G3	Alive	Residual disease	Yes	Interval cytoreductive surgery	No
15008	wildtype	21.1724	82.3881	64.3671	III+IV	Ovary	G3	Alive	Residual disease	No	Primary cytoreductive surgery	No
8221	wildtype	46.6187	82.3553	73.1233	I+II	Ovary	G2	Deceased	No residual disease	No	Primary cytoreductive surgery	No
2197	wildtype	49.709	82.3224	72.3425	III+IV	Ovary	G3	Deceased	Residual disease	No	Primary cytoreductive surgery	No
11832	wildtype	11.967	82.3224	71.7781	III+IV	Peritoneum	G3	Deceased	Residual disease	No	other	No
3969	wildtype	82.1909	82.1909	61.726	I+II	Ovary	G3	Deceased	No residual disease	No	Primary cytoreductive surgery	No
65598	wildtype	25.8079	81.9279	56.1863	III+IV	Ovary	G3	Deceased	No residual disease	No	Primary cytoreductive surgery	No
66007	wildtype	52.8652	81.8292	70.0219	III+IV	Ovary	G2	Alive	No residual disease	No	Primary cytoreductive surgery	No
621	wildtype	11.0136	81.6977	34.4466	III+IV	Ovary		Deceased	No residual disease	No	Primary cytoreductive surgery	No
6321	wildtype	52.109	81.0073	58.8822	III+IV	Ovary	G3	Deceased	Residual disease	No	Primary cytoreductive surgery	No
5508	wildtype	39.879	80.4813	62.4575	III+IV	Ovary		Deceased	No residual disease	No	Primary cytoreductive surgery	No
10131	wildtype	73.8403	79.4293	64.8685	III+IV	Ovary	G3	Deceased	Residual disease	No	Primary cytoreductive surgery	No
1243	wildtype	16.2738	79.4293	54.3479	III+IV	Ovary	G3	Deceased	No residual disease	No	Primary cytoreductive surgery	No
1500	BRCA1	19.397	79.1334	55.81	III+IV	Ovary	G2	Deceased	No residual disease	No	Primary cytoreductive surgery	No
4850	BRCA1	11.4738	78.9032	37.29	III+IV	Ovary	G3	Deceased	No residual disease	No	Primary cytoreductive surgery	No
1031	wildtype	17.4902	78.6074	68.9726	III+IV	Ovary	G3	Deceased	Residual disease	No	Primary cytoreductive surgery	No
66062	BRCA2	31.9887	78.0813	60.97	III+IV	Ovary	G3	Alive	Residual disease	No	Interval cytoreductive surgery	No
11132	wildtype	11.9341	77.9498	55.5671	III+IV	Ovary	G3	Deceased	Residual disease	No	Primary cytoreductive surgery	No
6259	wildtype	13.3149	77.917	62.1014	III+IV	Ovary	G3	Deceased	Residual disease	No	Primary cytoreductive surgery	No
11316	wildtype	6.50952	77.3252	59.9178	III+IV	Ovary	G3	Deceased	Residual disease	No	Primary cytoreductive surgery	No
2103	wildtype	20.6135	77.2594	58.5945	III+IV	Peritoneum	G2	Deceased	Residual disease	No	Primary cytoreductive surgery	No
12248	wildtype	57.7309	76.9964	62.7315	III+IV	Ovary	G3	Deceased	No residual disease	No	Primary cytoreductive surgery	No
15296	BRCA1	22.8491	76.9635	46.52	III+IV	Peritoneum	G3	Deceased	Residual disease	No	Primary cytoreductive surgery	No
93	wildtype	37.0188	76.7663	60.8767	III+IV	Fallopian tube	G3	Deceased	No residual disease	No	other	No
15418	wildtype	7.59444	76.7005	58.8603	III+IV	Ovary	G3	Deceased	Residual disease	No	Primary cytoreductive surgery	No
66338	wildtype	26.6956	76.6019	46.1205	III+IV	Peritoneum	G3	Deceased	No residual disease	No	Primary cytoreductive surgery	No
66021	wildtype	19.5286	76.5033	51.8849	III+IV	Ovary	G3	Alive	No residual disease	No	Primary cytoreductive surgery	No
10629	wildtype	23.145	76.2403	46.0274	III+IV	Ovary	G3	Deceased	No residual disease	No	Primary cytoreductive surgery	No
66114	BRCA1	47.5721	76.2074	41.88	III+IV	Ovary	G3	Deceased	No residual disease	Yes	Interval cytoreductive surgery	No
6251	wildtype	15.1889	76.1745	63.6082	III+IV	Ovary	G2	Deceased	Residual disease	No	Primary cytoreductive surgery	No
10701	wildtype	16.0437	75.8129	59.6877	I+II	Ovary		Deceased		No	Primary cytoreductive surgery	No
66108	wildtype	45.5337	75.7142	76.5315		Ovary	G3	Alive	No residual disease	Yes	Interval cytoreductive surgery	No
9068	wildtype	64.9637	75.3855	69.0192	III+IV	Peritoneum	G3	Deceased	No residual disease	No	Primary cytoreductive surgery	No
6213	BRCA1	25.5449	74.9581	74.56	III+IV	Peritoneum	G3	Deceased	Residual disease	No	Primary cytoreductive surgery	No
65571	wildtype	18.7724	74.7279	62.7945	III+IV	Ovary	G3	Deceased	Residual disease	No	Primary cytoreductive surgery	No
66640	wildtype	74.6622	74.6622	68.3		Ovary	G3	Alive	No residual disease	No	Primary cytoreductive surgery	No
66331	BRCA1	14.4985	74.4649	37.5	III+IV	Ovary	G3	Deceased	No residual disease	No	Primary cytoreductive surgery	No
6266	wildtype	19.2327	74.4649	50.8548	I+II	Ovary	G2	Deceased	Residual disease	No	Primary cytoreductive surgery	No
6988	wildtype	74.2677	74.2677	52.7068	III+IV	Ovary	G3	Alive	No residual disease	No	Primary cytoreductive surgery	No
9152	wildtype	74.2019	74.2019	67.4329	I+II	Fallopian tube	G3	Deceased	No residual disease	No	Primary cytoreductive surgery	No
10913	wildtype	74.1033	74.1033	74.4904	III+IV	Ovary	G3	Deceased	No residual disease	Yes	Interval cytoreductive surgery	No
5406	wildtype	16.6354	74.0375	67.9068	III+IV	Peritoneum	G3	Deceased	Residual disease	No	Primary cytoreductive surgery	No
5815	BRCA2	14.9587	73.7088	58.27	III+IV	Ovary	G2	Deceased	Residual disease	No	Primary cytoreductive surgery	No
1034	wildtype	32.4818	73.5444	65.0466	III+IV	Ovary	G3	Deceased	Residual disease	No	Primary cytoreductive surgery	No
11764	wildtype	8.18621	73.5444	76.2055	III+IV	Peritoneum	G3	Deceased	Residual disease	No	Primary cytoreductive surgery	No
66207	wildtype	29.0298	73.2814	63.7342	III+IV	Ovary	G3	Deceased	Residual disease	No	Primary cytoreductive surgery	No
94	wildtype	12.8547	73.0184	52.3397	III+IV	Ovary		Deceased	No residual disease	No	Primary cytoreductive surgery	No
66530	wildtype	21.6984	72.9526	56.0822	III+IV	Ovary	G3	Alive	Residual disease	No	Primary cytoreductive surgery	No
66557	BRCA2	33.764	72.9197	37.76	III+IV	Ovary	G3	Deceased	No residual disease	Yes	Interval cytoreductive surgery	No
11407	wildtype	38.2681	72.7225	48.2904	I+II	Ovary	G3	Deceased	No residual disease	No	Primary cytoreductive surgery	No
8075	BRCA1	27.8791	72.6567	45.19	III+IV	Ovary	G2	Deceased	No residual disease	No	Primary cytoreductive surgery	No
15303	wildtype	59.7363	72.6567	68.526	III+IV	Ovary	G3	Deceased	Residual disease	No	Primary cytoreductive surgery	No
15283	wildtype	17.4245	72.6239	54.6521	III+IV	Ovary	G3	Deceased	Residual disease	Yes	Interval cytoreductive surgery	No
4530	wildtype	36.1311	72.591	50.2712	III+IV	Ovary		Deceased	No residual disease	Yes	Interval cytoreductive surgery	No
66580	wildtype	19.6929	72.591	45.789	III+IV	Ovary		Alive		Yes	Interval cytoreductive surgery	No
12171	wildtype	16.7669	72.591	66.0767	III+IV	Ovary	G3	Deceased	No residual disease	No	Primary cytoreductive surgery	No
8336	wildtype	10.7177	72.591	54.937	III+IV	Ovary	G2	Deceased	Residual disease	No	Primary cytoreductive surgery	No
66030	wildtype	72.5581	72.5581	55.1205	III+IV	Ovary	G3	Alive	No residual disease	No	Primary cytoreductive surgery	No
66543	BRCA1	67.791	72.2951	60.63	III+IV	Ovary	G3	Alive	No residual disease	No	Primary cytoreductive surgery	No
1184	wildtype	17.2272	72.1636	40.4247	III+IV	Ovary	G2	Deceased	Residual disease	No	Primary cytoreductive surgery	No
66506	wildtype	20.7779	72.1307	53.0986	III+IV	Fallopian tube	G3	Alive		Yes		No
3484	wildtype	20.0217	72.0321	65.1479	III+IV	Peritoneum	G3	Deceased	Residual disease	No	Primary cytoreductive surgery	No
65633	wildtype	71.802	71.802	48.7781	III+IV	Ovary	G3	Alive	Residual disease	No	Primary cytoreductive surgery	Yes
1728	wildtype	34.1914	71.802	51.3151	I+II	Ovary	G2	Alive		No	Primary cytoreductive surgery	No
66585	BRCA1	33.0736	71.7362	58.57	I+II	Ovary	G3	Alive	No residual disease	No	Primary cytoreductive surgery	No
65914	BRCA2	14.4985	71.6376	48.24	III+IV	Peritoneum	G3	Deceased	No residual disease	Yes	Interval cytoreductive surgery	No
1511	wildtype	10.8492	71.3417	55.6082	III+IV	Ovary	G3	Deceased	Residual disease	No	Primary cytoreductive surgery	No
66587	wildtype	40.4708	71.2759	54.3288	III+IV	Ovary	G3	Alive	Residual disease	Yes	Interval cytoreductive surgery	No
66849	wildtype	40.8982	71.0787	66.0137	I+II	Ovary	G3	Alive	No residual disease	No	Primary cytoreductive surgery	No
538	wildtype	22.2244	70.98	60.3233	III+IV	Ovary	G2	Deceased	No residual disease	Yes	Interval cytoreductive surgery	No
7858	wildtype	14.3012	70.5527	53.6438	III+IV	Ovary	G3	Deceased	No residual disease	No	Primary cytoreductive surgery	No
66298	BRCA2	21.4354	70.4211	58.3	III+IV	Ovary	G3	Alive	Residual disease	Yes	Interval cytoreductive surgery	No
10928	wildtype	18.7066	70.1581	53.5836	III+IV	Fallopian tube	G3	Deceased	Residual disease	No	Primary cytoreductive surgery	No
6406	BRCA2	29.2928	70.0595	53.26	III+IV	Ovary	G3	Deceased	Residual disease	No	Primary cytoreductive surgery	No
7716	wildtype	69.7636	69.7636	52.2822	I+II	Ovary	G3	Alive		No	Primary cytoreductive surgery	No
66744	wildtype	69.7307	69.7307	73.211	III+IV	Ovary	G3	Alive	No residual disease	Yes	Interval cytoreductive surgery	No
4121	wildtype	21.1395	69.7307	66.2411	III+IV	Ovary	G2	Deceased	No residual disease	No	Primary cytoreductive surgery	No
65879	BRCA1	14.7944	69.3362	35.22	III+IV	Ovary	G3	Deceased	No residual disease	No	other	No
15309	wildtype	14.6957	69.3362	72.7726	III+IV	Ovary	G3	Deceased	Residual disease	No	Primary cytoreductive surgery	No
4112	BRCA1	9.59989	69.0732	49.73	III+IV	Peritoneum	G3	Deceased	Residual disease	No	Primary cytoreductive surgery	No
11757	BRCA1	20.4491	68.8102	39.29	III+IV	Peritoneum	G3	Deceased	Residual disease	No	Primary cytoreductive surgery	No
15326	wildtype	18.8053	68.8102	57.6027		Ovary	G3	Deceased	Residual disease	No	Primary cytoreductive surgery	No
66246	wildtype	68.7445	68.7445	52.6877	I+II	Ovary	G3	Alive	Residual disease	No	Primary cytoreductive surgery	No
65601	wildtype	68.7116	68.7116	62.7699	I+II	Fallopian tube	G3	Alive	No residual disease	No	Primary cytoreductive surgery	No
6867	BRCA2	16.6026	68.5801	62.27	III+IV	Ovary	G3	Deceased	Residual disease	No	Primary cytoreductive surgery	No
8500	wildtype	52.6022	68.5801	60.9562	III+IV	Ovary	G3	Deceased		No	Primary cytoreductive surgery	No
66733	BRCA1	50.8268	68.4814	48.56		Ovary	G3	Alive	Residual disease	No	Primary cytoreductive surgery	Yes
65870	wildtype	15.3204	68.4486	61.4904	III+IV	Ovary	G3	Deceased	Residual disease	No	Primary cytoreductive surgery	No
327	wildtype	68.3171	68.3171	69.1233	III+IV		G3	Alive	No residual disease	No	Primary cytoreductive surgery	No
66016	wildtype	43.0023	68.054	64.1808	III+IV	Ovary	G3	Alive	No residual disease	Yes		No
66110	wildtype	47.0132	67.6924	56		Ovary	G3	Alive		No		No
165	wildtype	43.5283	67.6267	56.8575	III+IV	Ovary	G2	Deceased	Residual disease	No	Primary cytoreductive surgery	No
11618	wildtype	28.8326	67.4623	49.7041	III+IV	Ovary	G3	Deceased	Residual disease	No	Primary cytoreductive surgery	No
9571	wildtype	67.4294	67.4294	71.9863	III+IV	Ovary	G3	Alive		No	Primary cytoreductive surgery	No
2691	wildtype	32.0216	67.2979	50.863	III+IV	Ovary		Deceased	No residual disease	No	Primary cytoreductive surgery	No
1806	wildtype	26.9586	66.9363	50.1425	III+IV	Ovary	G3	Deceased	Residual disease	No	Primary cytoreductive surgery	No
8633	wildtype	29.6873	66.8705	76.6658	III+IV	Ovary	G3	Deceased	Residual disease	No	Primary cytoreductive surgery	No
66490	wildtype	9.89578	66.8705	66.6329	III+IV	Ovary	G3	Deceased	Residual disease	No	Primary cytoreductive surgery	No
4528	wildtype	31.5284	66.739	69.5151	III+IV	Peritoneum	G3	Deceased	Residual disease	No	Primary cytoreductive surgery	No
2928	wildtype	24.9203	66.6075	45.4438	III+IV	Ovary	G3	Deceased	Residual disease	No	Primary cytoreductive surgery	No
451	wildtype	24.1312	66.3774	53.1096	III+IV	Ovary	G3	Deceased	No residual disease	No	Primary cytoreductive surgery	No
5684	wildtype	17.556	66.3445	42.1973	III+IV	Ovary	G3	Deceased	No residual disease	No	Primary cytoreductive surgery	No
15340	wildtype	26.0052	66.1143	55.9479	III+IV	Ovary	G3	Deceased	Residual disease	No	Primary cytoreductive surgery	No
65573	wildtype	11.967	66.0815	76.1589	III+IV	Ovary	G3	Deceased	Residual disease	No	Primary cytoreductive surgery	No
8538	wildtype	19.8244	65.95	72.189	III+IV	Ovary		Deceased	Residual disease	Yes	Interval cytoreductive surgery	No
434	wildtype	65.8513	65.8513	39.0685	I+II	Ovary	G3	Alive	No residual disease	No	Primary cytoreductive surgery	No
9816	wildtype	45.205	65.4897	60.4822	III+IV	Ovary	G3	Deceased	No residual disease	No	Primary cytoreductive surgery	No
5660	wildtype	11.6711	65.3253	59.8849	III+IV	Ovary	G3	Deceased	Residual disease	No	Primary cytoreductive surgery	No
11654	wildtype	25.0518	65.1609	66.2959	III+IV	Fallopian tube	G3	Deceased	Residual disease	No	Primary cytoreductive surgery	No
7061	wildtype	18.1149	65.0623	62.0466	III+IV	Ovary	G3	Deceased	Residual disease	No	Primary cytoreductive surgery	No
5050	wildtype	15.682	64.9637	63.0247	III+IV	Ovary	G2	Deceased	Residual disease	Yes	Interval cytoreductive surgery	No
10083	wildtype	8.21909	64.8322	53.9945	III+IV	Ovary	G3	Deceased	Residual disease	No	Primary cytoreductive surgery	No
11047	wildtype	11.3423	64.7007	57.5151	III+IV	Ovary	G2	Deceased	No residual disease	No	Primary cytoreductive surgery	No
4996	wildtype	9.50127	64.4376	64.6548	III+IV	Ovary	G3	Deceased	No residual disease	No	Primary cytoreductive surgery	No
2555	wildtype	9.63277	63.9445	67.8904	III+IV	Peritoneum	G2	Deceased	No residual disease	Yes	Interval cytoreductive surgery	No
9958	wildtype	24.46	63.8459	65.9699	III+IV	Ovary	G3	Deceased	Residual disease	No	Primary cytoreductive surgery	No
11763	wildtype	63.6157	63.6157	69.2164	I+II	Ovary	G3	Alive	No residual disease	No	Primary cytoreductive surgery	No
4465	wildtype	63.6157	63.6157	53.1808	I+II	Ovary	G3	Alive	No residual disease	No	Primary cytoreductive surgery	No
11454	wildtype	27.7148	63.6157	59.3616	III+IV	Ovary	G3	Deceased	No residual disease	No	Primary cytoreductive surgery	No
9696	wildtype	63.4842	63.4842	43.2603	I+II	Ovary	G3	Alive	No residual disease	No	Primary cytoreductive surgery	No
10263	wildtype	12.4601	63.3199	63.1589	III+IV	Ovary	G3	Deceased	No residual disease	No	Primary cytoreductive surgery	No
6989	wildtype	63.1555	63.1555	52.5753	I+II	Ovary	G2	Alive	No residual disease	No	Primary cytoreductive surgery	No
5708	wildtype	63.0897	63.0897	52.2493	I+II	Ovary	G2	Alive	No residual disease	No	Primary cytoreductive surgery	No
15240	BRCA1	21.6655	63.0568	45.45	III+IV	Ovary	G3	Deceased	Residual disease	No	Primary cytoreductive surgery	No
9962	BRCA1	16.7012	62.8267	53.68	III+IV	Peritoneum	G3	Deceased	No residual disease	No	Primary cytoreductive surgery	No
10457	wildtype	62.7938	62.7938	65.9151	I+II	Ovary	G2	Alive	No residual disease	No	Primary cytoreductive surgery	No
7248	wildtype	11.9012	62.7281	59.3562	III+IV	Ovary	G3	Deceased	Residual disease	No	Primary cytoreductive surgery	No
66018	BRCA2	14.9916	62.6623	52.51	III+IV	Ovary	G3	Deceased	Residual disease	No	Primary cytoreductive surgery	No
11568	wildtype	37.9064	62.5966	64.5014	III+IV	Ovary	G3	Alive	No residual disease	No	Primary cytoreductive surgery	No
66134	wildtype	62.4979	62.4979	57.537	III+IV	Fallopian tube	G3	Alive	Residual disease	No	Primary cytoreductive surgery	No
4260	wildtype	18.2464	62.4979	50.863	III+IV	Ovary	G3	Deceased	Residual disease	No	Primary cytoreductive surgery	No
6012	wildtype	15.7149	62.4322	54.411	III+IV	Ovary	G3	Deceased	Residual disease	No	Primary cytoreductive surgery	No
5703	wildtype	14.9916	62.3993	51.189	III+IV	Ovary	G3	Deceased	No residual disease	No	Primary cytoreductive surgery	No
8339	BRCA1	27.2216	62.3664	40.64	III+IV	Ovary	G3	Deceased	Residual disease	No	Primary cytoreductive surgery	No
66240	BRCA1	23.408	62.2349	49.65	III+IV	Fallopian tube	G3	Deceased	No residual disease	No	Primary cytoreductive surgery	No
1978	wildtype	32.0544	62.1363	67.8219	III+IV	Ovary	G3	Deceased	Residual disease	No	Primary cytoreductive surgery	No
66281	wildtype	12.6574	62.1034	74.8219	III+IV	Peritoneum	G3	Alive	No residual disease	Yes	Interval cytoreductive surgery	No
10124	wildtype	21.7313	61.9062	54.3781	III+IV	Ovary	G3	Deceased	Residual disease	No	Primary cytoreductive surgery	No
11393	BRCA1	11.5725	61.8404	56.28	III+IV	Ovary	G3	Deceased	Residual disease	No	Primary cytoreductive surgery	No
66103	wildtype	13.3807	61.3473	72.3342	I+II	Ovary	G3	Deceased	Residual disease	No	Primary cytoreductive surgery	No
5009	wildtype	14.9587	61.2158	56.863	III+IV	Ovary	G2	Deceased	Residual disease	No	Primary cytoreductive surgery	No
12159	wildtype	10.3561	61.2158	69.7973	III+IV	Ovary	G3	Deceased	Residual disease	No	Primary cytoreductive surgery	No
9699	wildtype	41.6543	61.0185	55.6712	III+IV	Ovary	G2	Deceased	No residual disease	No	Primary cytoreductive surgery	No
15411	wildtype	23.1778	61.0185	49.3589	III+IV	Ovary	G3	Deceased	Residual disease	No	Primary cytoreductive surgery	No
66280	wildtype	24.4271	60.9856	56.0877	III+IV		G3	Alive	No residual disease	Yes	Interval cytoreductive surgery	No
3074	wildtype	14.3012	60.9199	65.4438	III+IV	Ovary	G3	Deceased	Residual disease	No	Primary cytoreductive surgery	No
15407	wildtype	60.7884	60.7884	53.6575	III+IV	Ovary	G2	Alive	Residual disease	No	Primary cytoreductive surgery	No
9246	wildtype	60.7884	60.7884	33.6575	I+II	Ovary		Alive	No residual disease	No	Primary cytoreductive surgery	No
4490	wildtype	26.4655	60.7226	73.5945	III+IV	Ovary	G3	Deceased	Residual disease	No	Primary cytoreductive surgery	No
10739	wildtype	60.6897	60.6897	44.5918	III+IV	Ovary	G3	Alive	No residual disease	No	Primary cytoreductive surgery	No
8340	BRCA1	60.6897	60.6897	57.65	I+II	Ovary	G2	Alive	No residual disease	No	other	No
66105	wildtype	36.8873	60.5911	54.1452		Ovary	G3	Deceased	No residual disease	No	Primary cytoreductive surgery	No
66118	wildtype	11.8684	60.361	48.1836	III+IV	Ovary	G3	Alive	No residual disease	Yes	Interval cytoreductive surgery	No
66751	wildtype	23.0792	60.2952	59.726	III+IV	Fallopian tube	G3	Alive	No residual disease	Yes	Interval cytoreductive surgery	No
12182	wildtype	60.1308	60.1308	46.4822	III+IV	Ovary	G3	Alive	Residual disease	No	Primary cytoreductive surgery	No
66288	BRCA2	17.5888	60.0651	72.91	I+II	Fallopian tube	G3	Alive	Residual disease	No	other	No
8072	wildtype	20.6463	59.9665	65.7479	III+IV	Ovary	G3	Deceased		No	Primary cytoreductive surgery	No
15295	BRCA2	13.5779	59.9665	53.86		Ovary	G3	Deceased	Residual disease	Yes	other	No
66312	wildtype	9.30401	59.8021	56.874	III+IV	Ovary	G3	Alive		Yes	Interval cytoreductive surgery	No
385	wildtype	18.8381	59.7363	58.4548	III+IV	Peritoneum	G2	Deceased	No residual disease	No	Primary cytoreductive surgery	No
15255	wildtype	16.3067	59.5391	71.2384	III+IV	Ovary	G2	Alive	No residual disease	Yes	Interval cytoreductive surgery	No
4622	wildtype	6.60815	59.5062	68.4274	III+IV	Ovary	G2	Deceased	Residual disease	No	Primary cytoreductive surgery	No
66148	BRCA1	18.4765	59.4076	50.08	III+IV	Fallopian tube	G3	Alive	Residual disease	No	Primary cytoreductive surgery	No
66665	wildtype	22.1258	59.3418	58.5699	III+IV	Peritoneum	G2	Deceased	Residual disease	Yes	Interval cytoreductive surgery	No
66692	wildtype	34.7503	59.2103	73.7699	III+IV	Ovary	G3	Alive	Residual disease	No	Primary cytoreductive surgery	No
65981	wildtype	4.93145	59.1117	49.6849	III+IV	Ovary	G3	Alive	No residual disease	No	Primary cytoreductive surgery	No
7721	wildtype	36.0325	58.6843	72.6932	III+IV	Ovary	G3	Deceased	No residual disease	No	Primary cytoreductive surgery	No
11885	wildtype	20.5806	58.4213	48.937	III+IV	Ovary	G3	Deceased	Residual disease	No	Primary cytoreductive surgery	No
1679	wildtype	12.9204	58.2569	57.3726	III+IV	Ovary	G3	Deceased	Residual disease	No	Primary cytoreductive surgery	No
5480	wildtype	14.3998	58.1911	61.5589	I+II	Fallopian tube	G3	Deceased	No residual disease	No	Primary cytoreductive surgery	No
8484	wildtype	58.1254	58.1254	64.0137	III+IV	Ovary	G3	Deceased		No	Primary cytoreductive surgery	No
8784	wildtype	12.9204	58.1254	56.9205	III+IV	Ovary	G3	Deceased	Residual disease	No	Primary cytoreductive surgery	No
66584	BRCA1	21.8299	57.9281	53.49	III+IV	Ovary	G3	Alive	Residual disease	No	Primary cytoreductive surgery	No
4278	wildtype	11.0465	57.8295	58.4192	III+IV	Ovary	G3	Deceased	Residual disease	No	Primary cytoreductive surgery	No
9247	wildtype	23.2436	57.698	67.1726	III+IV	Ovary	G3	Deceased	Residual disease	No	Primary cytoreductive surgery	No
65842	wildtype	21.3039	57.6651	71.989	III+IV	Ovary	G2	Deceased	Residual disease	No	other	No
3379	wildtype	8.18621	57.5994	71.8356	III+IV	Peritoneum	G3	Deceased	Residual disease	Yes	Interval cytoreductive surgery	No
7253	wildtype	11.8684	57.5336	58.2438	III+IV	Ovary	G3	Deceased		No	Primary cytoreductive surgery	No
65892	BRCA1	57.5007	57.5007	37.99	III+IV	Fallopian tube	G3	Alive	No residual disease	No	Primary cytoreductive surgery	Yes
1294	wildtype	24.7559	57.3035	75.3918	III+IV	Peritoneum	G3	Deceased	Residual disease	Yes	Interval cytoreductive surgery	No
66434	BRCA1	14.5313	57.2377	80.39	III+IV	Fallopian tube	G3	Deceased	Residual disease	No	Primary cytoreductive surgery	No
4366	wildtype	57.172	57.172	57.0466	III+IV	Ovary	G3	Alive	No residual disease	No	Primary cytoreductive surgery	No
435	wildtype	15.8793	57.0076	72.7041	III+IV	Ovary	G2	Deceased	Residual disease	No	Primary cytoreductive surgery	No
65547	wildtype	14.8272	57.0076	62.2548	III+IV	Ovary	G3	Deceased	Residual disease	No	Primary cytoreductive surgery	No
66273	wildtype	19.9888	56.9418	63.9233	III+IV	Fallopian tube	G3	Deceased	Residual disease	Yes	Interval cytoreductive surgery	No
9682	wildtype	11.5067	56.8761	52.2575	III+IV	Ovary	G2	Deceased		Yes	Interval cytoreductive surgery	No
2988	BRCA1	22.6518	56.8761	31.32	III+IV	Fallopian tube	G3	Deceased	Residual disease	No	Primary cytoreductive surgery	No
6173	wildtype	36.7886	56.8432	74.9589	III+IV	Fallopian tube	G3	Deceased		No	other	No
1946	wildtype	27.0901	56.7775	53.8356	III+IV	Ovary	G3	Deceased	No residual disease	No	Primary cytoreductive surgery	No
5855	BRCA2	29.9175	56.7446	70.3	III+IV	Ovary	G3	Deceased	Residual disease	No	Primary cytoreductive surgery	No
11159	BRCA2	19.7258	56.5802	53.95	III+IV	Ovary	G3	Deceased	Residual disease	No	Primary cytoreductive surgery	No
66428	BRCA1	4.43831	56.5473	48.04	III+IV	Ovary	G2	Deceased	Residual disease	No	Primary cytoreductive surgery	No
9995	wildtype	13.0519	56.4158	66.7014	III+IV	Ovary	G3	Deceased	No residual disease	No	Primary cytoreductive surgery	No
66291	wildtype	11.3423	56.3829	70.3644	III+IV	Ovary	G3	Deceased	No residual disease	Yes	Interval cytoreductive surgery	No
9752	wildtype	16.3067	56.3172	60.2575	III+IV	Ovary	G3	Deceased	Residual disease	No	Primary cytoreductive surgery	No
0	wildtype	6.77253	56.2843	48.0685	III+IV	Ovary	G3	Deceased	No residual disease	No	Primary cytoreductive surgery	No
15342	BRCA1	19.1998	56.2514	63.66	III+IV	Peritoneum	G3	Deceased	Residual disease	No	Primary cytoreductive surgery	No
1236	wildtype	26.597	56.1857	45.3041	III+IV	Ovary	G3	Deceased	No residual disease	No	Primary cytoreductive surgery	No
9255	wildtype	23.2765	56.0213	74.2521	III+IV	Ovary	G3	Deceased	Residual disease	No	Primary cytoreductive surgery	No
4531	wildtype	12.3286	55.824	72.7233	III+IV	Ovary	G2	Deceased	No residual disease	Yes	Interval cytoreductive surgery	No
12254	BRCA1	10.8492	55.7912	58.87	III+IV	Peritoneum	G3	Deceased	Residual disease	No	Primary cytoreductive surgery	No
66173	BRCA2	0	55.6268	66.74	III+IV	Ovary	G3	Deceased	No residual disease	No	Primary cytoreductive surgery	No
6004	wildtype	55.5939	55.5939	62.5781	III+IV	Peritoneum	G2	Deceased	No residual disease	No	Primary cytoreductive surgery	No
66745	wildtype	18.4436	55.4624	52.989	III+IV	Ovary	G3	Deceased	Residual disease	No	Primary cytoreductive surgery	No
2409	wildtype	15.0245	55.4624	57.4055	III+IV	Ovary	G3	Deceased	Residual disease	No	Primary cytoreductive surgery	No
12252	wildtype	14.7944	55.4624	48.7863	III+IV	Ovary	G2	Deceased	Residual disease	No	Primary cytoreductive surgery	No
10281	wildtype	14.7615	55.4624	80.4082	III+IV	Peritoneum	G3	Deceased	No residual disease	Yes	Interval cytoreductive surgery	No
11502	BRCA2	18.871	55.1994	57.21	III+IV	Ovary	G3	Deceased	Residual disease	No	Primary cytoreductive surgery	No
8525	wildtype	11.7369	55.1336	59.0877	III+IV	Ovary	G2	Deceased	Residual disease	Yes	Interval cytoreductive surgery	No
7893	wildtype	55.035	55.035	37.9425		Ovary		Alive	No residual disease	No	Primary cytoreductive surgery	No
65659	BRCA1	10.2245	55.0021	62.93	III+IV	Peritoneum	G3	Deceased	Residual disease	Yes	other	No
10519	BRCA1	20.9094	54.9693	66.28	III+IV	Ovary	G3	Deceased	Residual disease	No	Primary cytoreductive surgery	No
11761	wildtype	54.9035	54.9035	51.389	I+II	Ovary	G2	Alive	No residual disease	No	Primary cytoreductive surgery	No
648	wildtype	24.3943	54.8706	40.7808	III+IV	Ovary		Deceased	Residual disease	No	Primary cytoreductive surgery	No
66353	wildtype	14.2026	54.8049	58.8849	III+IV	Fallopian tube	G3	Deceased	No residual disease	Yes	Interval cytoreductive surgery	No
66142	wildtype	13.7423	54.772	57.4658		Ovary	G3	Deceased	Residual disease	No	other	No
10132	wildtype	20.0217	54.7062	46.411	III+IV	Peritoneum	G3	Deceased	Residual disease	No	Primary cytoreductive surgery	No
11768	wildtype	11.0793	54.7062	50.7151	III+IV	Ovary	G3	Deceased	Residual disease	No	Primary cytoreductive surgery	No
15292	BRCA2	14.2355	54.6405	59.66	III+IV	Ovary	G3	Deceased	Residual disease	No	Primary cytoreductive surgery	No
3386	wildtype	16.3724	54.509	69.1178	III+IV	Ovary	G3	Deceased	Residual disease	No	Primary cytoreductive surgery	No
7108	wildtype	7.98895	54.2789	50.4082	III+IV	Ovary	G3	Deceased	No residual disease	Yes	Interval cytoreductive surgery	No
65876	wildtype	28.2079	54.1145	63.1151	III+IV	Ovary	G3	Deceased	No residual disease	No	Primary cytoreductive surgery	Yes
11633	wildtype	15.5505	54.0487	61.6247	III+IV	Peritoneum	G3	Deceased	Residual disease	No	Primary cytoreductive surgery	No
1534	wildtype	5.32597	53.8843	60.9151	III+IV	Ovary	G3	Deceased	Residual disease	No	Primary cytoreductive surgery	No
12049	wildtype	16.9313	53.6542	68.8904	III+IV	Peritoneum	G3	Deceased	Residual disease	No	Primary cytoreductive surgery	No
65862	BRCA1	5.35885	53.5227	54.63		Ovary	G2	Deceased	Residual disease	Yes	Interval cytoreductive surgery	No
3843	wildtype	23.408	53.1282	53.4219	III+IV	Ovary	G3	Deceased	Residual disease	No	Primary cytoreductive surgery	No
5400	wildtype	19.397	52.9309	47.126	III+IV	Ovary	G3	Deceased	Residual disease	No	Primary cytoreductive surgery	No
1796	BRCA1	17.4245	52.7994	52.5	I+II	Fallopian tube	G3	Deceased	No residual disease	Yes	Interval cytoreductive surgery	No
11191	BRCA1	26.8929	52.372	47.87	III+IV	Ovary	G3	Deceased	Residual disease	No	Primary cytoreductive surgery	No
1197	wildtype	18.8381	52.2734	68.1452	III+IV	Ovary	G3	Deceased	Residual disease	No	Primary cytoreductive surgery	No
65594	BRCA1	47.8351	51.7803	73.5	III+IV	Ovary	G3	Deceased	No residual disease	No	Primary cytoreductive surgery	No
15226	wildtype	21.6326	51.7145	45.9699	III+IV	Ovary	G2	Deceased	Residual disease	No	Primary cytoreductive surgery	No
65874	wildtype	21.8299	51.5501	67.7781	III+IV	Ovary	G3	Deceased	No residual disease	No	Primary cytoreductive surgery	No
6040	wildtype	32.4161	51.3529	63.0055	III+IV	Ovary	G2	Deceased	Residual disease	No	Primary cytoreductive surgery	No
2487	BRCA2	51.32	51.32	51.62	III+IV	Ovary	G3	Alive	No residual disease	No	Primary cytoreductive surgery	No
4755	BRCA1	15.0574	51.2871	58.8	III+IV	Ovary	G3	Deceased	Residual disease	No	Primary cytoreductive surgery	No
65583	wildtype	17.819	51.057	68.3671	III+IV	Fallopian tube	G3	Deceased	Residual disease	No	Primary cytoreductive surgery	No
4910	wildtype	16.6683	50.8268	71.4274	III+IV	Fallopian tube	G2	Deceased	Residual disease	Yes	Interval cytoreductive surgery	No
9920	wildtype	29.523	50.7611	80.0521	III+IV	Ovary	G3	Deceased	No residual disease	No	Primary cytoreductive surgery	No
2907	wildtype	8.15334	50.531	58.3233	III+IV	Peritoneum	G3	Deceased	No residual disease	Yes	Interval cytoreductive surgery	No
15229	BRCA1	14.1697	50.2351	50.23	III+IV	Ovary	G3	Deceased	Residual disease	No	Primary cytoreductive surgery	No
4631	BRCA1	12.7231	50.2351	48.19	III+IV	Peritoneum	G3	Deceased	Residual disease	No	Primary cytoreductive surgery	No
66443	wildtype	50.1364	50.1364	60.7096	III+IV	Ovary	G3	Alive	No residual disease	No	Primary cytoreductive surgery	Yes
9930	BRCA1	25.7422	50.0707	48.38	III+IV	Ovary	G3	Deceased	Residual disease	No	Primary cytoreductive surgery	No
8553	wildtype	21.797	49.9392	61.7041	III+IV	Ovary	G3	Deceased	Residual disease	No	Primary cytoreductive surgery	No
66748	wildtype	15.3204	49.9063	58.674		Ovary	G3	Alive	No residual disease	No	Primary cytoreductive surgery	No
1276	wildtype	14.5313	49.8077	55.3589	III+IV	Ovary	G3	Deceased	Residual disease	No	Primary cytoreductive surgery	No
66005	wildtype	49.6433	49.6433	86.6712	III+IV	Ovary	G3	Alive		No		No
10262	wildtype	26.4983	49.6433	49.7726	III+IV	Ovary	G2	Deceased	No residual disease	No	Primary cytoreductive surgery	No
9046	wildtype	17.9834	49.5447	58.0164	III+IV	Ovary	G3	Deceased	Residual disease	No	Primary cytoreductive surgery	No
1032	wildtype	28.5367	49.4789	51.5068	III+IV	Ovary	G2	Deceased	No residual disease	No	Primary cytoreductive surgery	No
66144	wildtype	49.4132	49.4132	52.2	I+II	Ovary	G3	Alive	No residual disease	No	Primary cytoreductive surgery	No
850	wildtype	18.7066	49.4132	65.2274	III+IV	Ovary	G3	Deceased	Residual disease	No	Primary cytoreductive surgery	No
66400	wildtype	17.7532	49.4132	65.1014	III+IV	Ovary	G3	Alive	No residual disease	Yes	Interval cytoreductive surgery	No
10760	wildtype	24.8874	49.3803	40.726	III+IV	Ovary	G3	Deceased	No residual disease	No	other	No
1284	BRCA2	21.2052	49.3803	71.7	III+IV	Ovary	G2	Deceased	Residual disease	Yes	Interval cytoreductive surgery	No
7953	BRCA1	32.1202	49.2488	54.01	III+IV	Ovary	G2	Deceased	Residual disease	No	Primary cytoreductive surgery	No
66586	wildtype	14.0053	49.2159	79.0877	III+IV	Fallopian tube	G3	Deceased	Residual disease	No	Primary cytoreductive surgery	No
2106	wildtype	14.6629	48.9529	76.4493	III+IV	Ovary	G3	Deceased	Residual disease	No	Primary cytoreductive surgery	No
3785	wildtype	48.8543	48.8543	66.1425	I+II	Ovary	G3	Alive	No residual disease	No	Primary cytoreductive surgery	No
66124	wildtype	19.4628	48.8543	65.6301	I+II	Peritoneum	G3	Alive	No residual disease	Yes	Interval cytoreductive surgery	No
8203	BRCA1	10.5862	48.4926	50.05	III+IV	Ovary	G3	Deceased	Residual disease	No	Primary cytoreductive surgery	No
66651	BRCA2	11.6711	48.2954	80.37	III+IV	Ovary	G3	Alive	No residual disease	Yes	Interval cytoreductive surgery	No
66694	wildtype	24.2299	48.2954	70.5808	III+IV	Fallopian tube	G3	Alive	No residual disease	No	Primary cytoreductive surgery	No
66283	wildtype	20.9094	48.2954	58.0767	III+IV	Ovary	G3	Deceased	No residual disease	No	Primary cytoreductive surgery	Yes
9844	wildtype	12.0656	48.1639	68.5808	III+IV	Peritoneum	G3	Deceased	No residual disease	No	Primary cytoreductive surgery	No
66115	wildtype	19.9231	48.131	55.5507	III+IV	Peritoneum	G3	Alive	Residual disease	No	Primary cytoreductive surgery	No
66438	BRCA1	42.7393	71.4074	56.83	III+IV	Ovary	G3	Deceased	Residual disease	No	Primary cytoreductive surgery	Yes
66364	wildtype	37.2489	48.0324	72.5041	III+IV	Ovary	G3	Alive	No residual disease	Yes	Interval cytoreductive surgery	No
66395	BRCA1	16.6026	47.9337	53.58	III+IV	Ovary	G3	Alive	No residual disease	Yes	Interval cytoreductive surgery	No
66716	wildtype	16.0108	47.9008	57.6192	III+IV	Fallopian tube	G3	Alive	No residual disease	Yes	Interval cytoreductive surgery	No
4947	BRCA1	12.6903	47.868	69	III+IV	Peritoneum	G3	Deceased	Residual disease	No	Primary cytoreductive surgery	No
66302	wildtype	17.7204	47.868	42.6411	III+IV	Ovary	G3	Alive	Residual disease	Yes	Interval cytoreductive surgery	No
66145	wildtype	47.8351	47.8351	54.7041	I+II	Fallopian tube	G3	Alive	No residual disease	No	Primary cytoreductive surgery	No
66205	BRCA2	18.4436	47.7693	75.9	III+IV	Ovary	G3	Alive	No residual disease	Yes	Interval cytoreductive surgery	No
66418	wildtype	16.1752	47.7036	62.589	III+IV	Ovary	G3	Alive	No residual disease	Yes	Interval cytoreductive surgery	No
66648	wildtype	22.9806	47.6707	68.463	III+IV	Ovary	G3	Alive		Yes	Interval cytoreductive surgery	No
66363	wildtype	22.9148	47.6707	70.1616	III+IV	Ovary	G3	Alive	No residual disease	Yes	Interval cytoreductive surgery	No
66437	wildtype	17.6875	47.605	58.1233	III+IV	Ovary	G3	Alive	Residual disease	No	Primary cytoreductive surgery	No
66362	BRCA2	33.0736	47.605	52.91	III+IV	Ovary	G3	Alive	No residual disease	Yes	Interval cytoreductive surgery	Yes
1251	BRCA2	18.1477	47.5392	59.29	III+IV	Ovary	G2	Deceased	Residual disease	No	Primary cytoreductive surgery	No
66413	wildtype	21.5998	47.4406	74.0959	III+IV	Peritoneum	G3	Alive	No residual disease	Yes	Interval cytoreductive surgery	No
563	wildtype	10.6519	47.4077	40.9534		Ovary		Deceased	Residual disease	No	Primary cytoreductive surgery	No
66406	BRCA1	20.4491	47.3091	42.96	III+IV	Ovary	G3	Deceased	No residual disease	Yes	Interval cytoreductive surgery	No
5544	wildtype	13.3478	47.2104	53.0959	III+IV	Ovary	G3	Deceased		No	Primary cytoreductive surgery	No
5874	BRCA1	33.3037	47.1118	43.74	III+IV	Ovary	G3	Deceased	Residual disease	No	Primary cytoreductive surgery	No
2086	wildtype	11.7369	47.0789	67.3397	III+IV	Peritoneum	G2	Deceased	Residual disease	Yes	Interval cytoreductive surgery	No
15009	wildtype	23.5723	47.0132	57.7151	III+IV	Ovary	G3	Deceased	Residual disease	No	Primary cytoreductive surgery	No
8479	BRCA1	14.9587	46.783	50.59	III+IV	Ovary	G3	Deceased	Residual disease	No	Primary cytoreductive surgery	No
15316	BRCA1	13.3478	46.7173	57.08	III+IV	Ovary	G3	Deceased	Residual disease	No	Primary cytoreductive surgery	No
11831	BRCA2	12.23	46.6515	76.51	I+II	Ovary	G3	Deceased	Residual disease	No	Primary cytoreductive surgery	No
9998	BRCA1	19.2327	46.5529	46.18	III+IV	Ovary	G3	Deceased	Residual disease	No	other	No
1603	wildtype	12.8547	46.4872	58.4877	III+IV	Peritoneum	G3	Deceased	Residual disease	No	Primary cytoreductive surgery	No
6315	wildtype	14.9916	46.4214	79.2904		Ovary	G2	Deceased		No	other	No
7620	BRCA1	15.3533	46.4214	51.88	III+IV	Ovary	G2	Deceased	Residual disease	No	Primary cytoreductive surgery	No
65682	wildtype	24.3614	46.3885	82.8932	III+IV	Ovary	G3	Deceased	Residual disease	No	Primary cytoreductive surgery	No
66233	wildtype	12.6245	46.3557	76.0356	III+IV	Ovary	G3	Deceased	Residual disease	No	Primary cytoreductive surgery	No
7064	BRCA1	16.8327	46.3228	57.32	III+IV	Ovary	G3	Deceased	Residual disease	No	Primary cytoreductive surgery	No
9954	wildtype	17.1286	46.3228	68.6575	III+IV	Ovary	G3	Deceased	Residual disease	No	Primary cytoreductive surgery	No
618	wildtype	10.6519	46.1255	43.2247	III+IV	Ovary	G3	Deceased	Residual disease	No	Primary cytoreductive surgery	No
9248	BRCA2	16.9642	46.1255	57.1	III+IV	Ovary	G3	Deceased	Residual disease	No	Primary cytoreductive surgery	No
65619	wildtype	14.893	46.0926	61.8466	III+IV	Ovary	G3	Deceased	Residual disease	No	Primary cytoreductive surgery	No
8575	wildtype	10.7177	45.994	51.7562	III+IV	Ovary	G3	Deceased	Residual disease	No	Primary cytoreductive surgery	No
11360	wildtype	12.1971	45.9611	67.4849	III+IV	Ovary	G3	Deceased	Residual disease	No	Primary cytoreductive surgery	No
66377	BRCA1	25.7422	45.9611	52.64	III+IV	Ovary	G3	Alive	No residual disease	Yes	Interval cytoreductive surgery	No
9221	wildtype	11.0465	45.8296	55.6712	III+IV	Ovary	G3	Deceased	No residual disease	No	Primary cytoreductive surgery	No
3303	wildtype	6.93691	45.8296	79.5178	III+IV	Ovary	G2	Deceased	Residual disease	No	Primary cytoreductive surgery	No
3229	wildtype	13.4136	45.731	47.5315	III+IV	Ovary	G3	Deceased	No residual disease	No	other	No
8462	wildtype	10.6519	45.5995	76.9973	III+IV	Peritoneum	G2	Deceased	Residual disease	No	other	No
11129	wildtype	14.8601	45.5666	67.1205	III+IV	Ovary	G3	Deceased	Residual disease	No	Primary cytoreductive surgery	No
66342	wildtype	7.26567	45.468	59.726	III+IV	Peritoneum	G3	Deceased	Residual disease	Yes	Interval cytoreductive surgery	No
15286	wildtype	26.0052	45.3694	64.8466	III+IV	Ovary	G3	Deceased	Residual disease	No	Primary cytoreductive surgery	No
66499	wildtype	27.2545	45.1392	77.5507	III+IV	Peritoneum	G3	Deceased	No residual disease	Yes	Interval cytoreductive surgery	No
66830	BRCA1	45.0077	45.0077	57.7	III+IV	Ovary	G3	Alive	No residual disease	No	Primary cytoreductive surgery	No
11354	wildtype	16.6354	44.7447	60.2192	III+IV	Ovary	G3	Deceased	Residual disease	No	Primary cytoreductive surgery	No
11424	wildtype	19.7916	44.3831	64.2712	III+IV	Ovary	G2	Deceased	Residual disease	No	Primary cytoreductive surgery	No
65541	wildtype	18.9697	44.0872	51.5068	III+IV	Ovary	G3	Deceased	Residual disease	Yes	Interval cytoreductive surgery	No
66297	wildtype	16.9971	44.0872	77.9479	III+IV	Ovary	G3	Deceased	No residual disease	Yes	Interval cytoreductive surgery	No
66425	wildtype	13.4464	43.6927	66.4932	III+IV	Ovary	G3	Deceased	No residual disease	Yes	Interval cytoreductive surgery	No
15318	wildtype	21.9614	43.594	39.1671	III+IV	Ovary	G3	Deceased	Residual disease	No	Primary cytoreductive surgery	No
4251	BRCA1	14.7286	43.331	41.42	III+IV	Ovary	G3	Deceased	Residual disease	No	Primary cytoreductive surgery	No
7688	wildtype	13.1505	43.2324	43.3973	III+IV	Ovary	G2	Deceased	Residual disease	No	Primary cytoreductive surgery	No
66462	BRCA1	12.0656	43.1995	54.92	III+IV	Ovary	G3	Deceased	Residual disease	No	other	No
3613	BRCA1	17.556	43.1667	42.88	III+IV	Ovary	G2	Deceased	No residual disease	Yes	Interval cytoreductive surgery	No
2410	wildtype	12.3286	43.1009	79.9178	III+IV	Peritoneum	G3	Deceased	No residual disease	No	Primary cytoreductive surgery	No
9231	wildtype	10.4876	43.068	57.8932	III+IV	Ovary	G3	Deceased	Residual disease	No	Primary cytoreductive surgery	No
15327	wildtype	28.0764	43.0351	65.1452	III+IV	Ovary	G3	Deceased	Residual disease	No	Primary cytoreductive surgery	No
1602	wildtype	27.649	43.0351	50.2247	III+IV	Ovary	G3	Deceased	Residual disease	No	Primary cytoreductive surgery	No
15227	wildtype	8.31772	43.0351	62.6164	III+IV	Peritoneum		Deceased	No residual disease	No	Primary cytoreductive surgery	No
11010	wildtype	19.5286	43.0023	49.2082	III+IV	Ovary	G3	Deceased	Residual disease	No	Primary cytoreductive surgery	No
65897	wildtype	10.5533	42.9036	67.063	III+IV	Ovary	G3	Deceased		Yes	Interval cytoreductive surgery	No
9357	BRCA2	12.4273	42.805	53	III+IV	Ovary	G3	Deceased	Residual disease	No	Primary cytoreductive surgery	No
66537	wildtype	31.6928	42.7393	76.874	III+IV	Fallopian tube	G3	Deceased	No residual disease	Yes	Interval cytoreductive surgery	No
66017	wildtype	42.7064	42.7064	60.9233	I+II	Fallopian tube	G3	Alive	No residual disease	No	Primary cytoreductive surgery	No
66238	wildtype	7.59444	42.6406	58.463	III+IV	Ovary	G3	Deceased	Residual disease	Yes	Interval cytoreductive surgery	No
3539	wildtype	42.5091	42.5091	52.8	III+IV	Ovary	G3	Deceased	Residual disease	No	Primary cytoreductive surgery	No
1609	wildtype	8.31772	42.5091	65.8219	I+II	Ovary	G3	Deceased	No residual disease	No	Primary cytoreductive surgery	No
5850	BRCA1	17.2272	42.4105	46.87	III+IV	Peritoneum	G3	Deceased	Residual disease	Yes	Interval cytoreductive surgery	No
66658	wildtype	11.704	42.1804	72.4274	III+IV	Peritoneum	G3	Deceased	Residual disease	No	Primary cytoreductive surgery	Yes
7936	wildtype	13.9067	42.0817	71.0192	III+IV	Ovary	G3	Deceased	Residual disease	No	Primary cytoreductive surgery	No
66635	wildtype	18.1477	41.9173	72.3452	III+IV	Peritoneum	G3	Deceased	Residual disease	Yes	Interval cytoreductive surgery	No
66392	wildtype	21.8299	41.8845	78.6274	III+IV	Ovary	G3	Alive	Residual disease	Yes	Interval cytoreductive surgery	No
11000	wildtype	31.0682	41.6215	71.0521	III+IV	Fallopian tube	G3	Deceased	Residual disease	No	Primary cytoreductive surgery	No
2741	wildtype	11.441	41.5886	55.7315	III+IV	Peritoneum	G2	Deceased	Residual disease	Yes	Interval cytoreductive surgery	No
3847	BRCA2	12.5259	41.5886	69.96	III+IV	Peritoneum	G2	Deceased	Residual disease	Yes	Interval cytoreductive surgery	No
15225	wildtype	14.4656	41.49	60.5973	III+IV	Peritoneum		Deceased	Residual disease	No	other	No
5383	wildtype	22.0929	41.4242	59.8932	III+IV	Ovary	G2	Deceased	Residual disease	No	Primary cytoreductive surgery	No
8461	BRCA2	10.5204	41.2598	64.73	III+IV	Ovary	G3	Deceased	Residual disease	No	Primary cytoreductive surgery	No
65969	wildtype	18.2464	41.1612	63.7315	III+IV	Ovary	G3	Deceased	Residual disease	No	Primary cytoreductive surgery	No
3084	wildtype	11.2766	41.1283	68.6247	III+IV	Ovary	G3	Deceased		No	Primary cytoreductive surgery	No
1448	wildtype	13.282	40.9639	54.7397	III+IV	Ovary	G2	Deceased	No residual disease	No	Primary cytoreductive surgery	No
66120	BRCA1	12.7889	40.9311	49.78	III+IV	Ovary	G3	Deceased	No residual disease	Yes	other	No
5311	wildtype	16.3067	40.8324	64.0493	III+IV	Ovary	G3	Deceased	Residual disease	No	Primary cytoreductive surgery	No
12323	wildtype	9.23825	40.8324	63.4849	III+IV	Ovary	G3	Deceased	Residual disease	No	Primary cytoreductive surgery	No
11269	wildtype	8.71223	40.8324	56.8767	III+IV	Peritoneum	G3	Deceased		No	Primary cytoreductive surgery	No
6399	BRCA1	21.008	40.7338	48.55	III+IV	Ovary	G3	Deceased	Residual disease	No	Primary cytoreductive surgery	No
66728	wildtype	15.5176	40.5037	52.8466	III+IV	Ovary	G3	Deceased	No residual disease	Yes	Interval cytoreductive surgery	No
65653	wildtype	23.9997	40.3722	57.4932	I+II	Ovary	G3	Deceased	No residual disease	No	Primary cytoreductive surgery	No
10628	wildtype	25.9723	40.3393	68.9781	III+IV	Peritoneum	G3	Deceased	No residual disease	No	other	No
15230	wildtype	21.5998	40.2735	46.9041	III+IV	Ovary	G3	Deceased	No residual disease	No	Primary cytoreductive surgery	No
2961	wildtype	18.2793	40.1091	57.9507	III+IV	Peritoneum	G3	Deceased	No residual disease	No	Primary cytoreductive surgery	No
3960	wildtype	11.0465	40.0763	45.0575	III+IV	Ovary	G2	Deceased	Residual disease	No	Primary cytoreductive surgery	No
66451	wildtype	11.0793	39.879	74.9589	III+IV	Ovary	G3	Deceased	Residual disease	No	Primary cytoreductive surgery	No
66352	wildtype	39.6489	39.6489	59.1836	III+IV	Ovary	G3	Alive		No	Primary cytoreductive surgery	No
10792	wildtype	22.3559	39.6489	57.8822	III+IV	Peritoneum	G3	Deceased	Residual disease	No	Primary cytoreductive surgery	No
368	wildtype	19.5614	39.616	54.9233	III+IV	Ovary	G3	Deceased	Residual disease	No	Primary cytoreductive surgery	No
1241	wildtype	23.408	39.4516	64.7425	III+IV	Ovary	G3	Deceased	Residual disease	Yes	Interval cytoreductive surgery	No
15328	wildtype	39.3859	39.3859	60.1863	III+IV	Fallopian tube	G2	Deceased	Residual disease	No	Primary cytoreductive surgery	No
11173	wildtype	11.2437	39.1886	63.9753	III+IV	Ovary	G3	Deceased	Residual disease	No	Primary cytoreductive surgery	No
15281	wildtype	5.68761	39.1229	63.6329		Ovary	G3	Deceased		No	Primary cytoreductive surgery	No
66290	wildtype	22.7504	39.09	64.7562	III+IV	Peritoneum	G3	Alive	No residual disease	Yes	Interval cytoreductive surgery	No
1330	wildtype	14.3012	39.0571	64.7589	III+IV	Ovary		Deceased	No residual disease	No	Primary cytoreductive surgery	No
2297	wildtype	10.3561	39.0242	53.9644	III+IV	Ovary	G3	Deceased	Residual disease	No	Primary cytoreductive surgery	No
9529	wildtype	9.86291	38.7941	67.6795	III+IV	Ovary	G3	Deceased	Residual disease	No	Primary cytoreductive surgery	No
4752	wildtype	24.2956	38.7612	56.3836	I+II	Ovary	G3	Deceased	No residual disease	No	Primary cytoreductive surgery	No
6579	wildtype	12.3615	38.7283	66.8438	III+IV	Ovary	G3	Deceased	Residual disease	No	Primary cytoreductive surgery	No
9109	wildtype	11.2766	38.6955	58.4822	III+IV	Ovary	G3	Deceased	Residual disease	No	Primary cytoreductive surgery	No
10885	wildtype	29.7531	38.6297	62.1781	III+IV	Ovary	G2	Deceased	No residual disease	No	Primary cytoreductive surgery	No
66250	wildtype	11.5067	38.5311	71.3589	III+IV	Peritoneum	G3	Alive	Residual disease	Yes	Interval cytoreductive surgery	No
6055	wildtype	23.8682	38.4982	56.937	III+IV	Ovary	G3	Deceased	Residual disease	No	Primary cytoreductive surgery	No
1781	wildtype	16.3724	38.4982	62.6411	III+IV	Ovary	G2	Deceased		Yes	Interval cytoreductive surgery	No
357	wildtype	16.1094	38.4325	67.9699	III+IV	Ovary	G3	Deceased	No residual disease	No	Primary cytoreductive surgery	No
8390	wildtype	12.6574	38.3667	75.9863	III+IV	Ovary	G3	Deceased	Residual disease	No	Primary cytoreductive surgery	No
948	wildtype	11.8026	38.3338	68.2466	III+IV	Ovary	G2	Deceased	Residual disease	No	Primary cytoreductive surgery	No
65907	wildtype	11.6054	38.2681	51.3534	III+IV	Ovary	G3	Deceased	Residual disease	No	Primary cytoreductive surgery	No
10257	wildtype	8.97524	38.2681	30.1699	III+IV	Ovary	G2	Deceased	Residual disease	No	Primary cytoreductive surgery	No
11895	BRCA2	9.20538	38.2023	48.52		Peritoneum	G3	Deceased	Residual disease	No	Primary cytoreductive surgery	No
66043	wildtype	18.6738	38.1694	61.1836		Ovary	G3	Deceased		Yes	Interval cytoreductive surgery	No
6490	BRCA1	12.8875	38.0379	63.67	III+IV	Ovary	G3	Deceased	Residual disease	No	Primary cytoreductive surgery	No
4823	wildtype	9.00812	37.9722	73.5726	III+IV	Peritoneum	G2	Deceased	Residual disease	Yes	Interval cytoreductive surgery	No
4508	wildtype	27.8463	37.9064	76.537	III+IV	Ovary	G3	Deceased	Residual disease	No	Primary cytoreductive surgery	No
9707	wildtype	21.4683	37.9064	77.8521	III+IV	Ovary	G3	Deceased		Yes	Interval cytoreductive surgery	No
66442	wildtype	37.8736	37.8736	71.3973	III+IV	Ovary	G3	Alive	Residual disease	No	Primary cytoreductive surgery	No
12203	wildtype	28.7997	37.8736	69.4301	III+IV	Peritoneum	G3	Deceased	No residual disease	No	Primary cytoreductive surgery	No
5021	BRCA1	37.8736	37.8736	56.12	III+IV	Ovary	G3	Deceased	Residual disease	No	Primary cytoreductive surgery	No
66166	wildtype	10.9149	37.7749	69.5342	III+IV	Fallopian tube	G3	Deceased	Residual disease	No	Primary cytoreductive surgery	No
15209	BRCA1	15.3861	37.7092	54.53	III+IV	Peritoneum	G3	Deceased	Residual disease	No	Primary cytoreductive surgery	No
66289	wildtype	34.7174	37.6763	54.0493	III+IV	Ovary	G3	Alive	No residual disease	Yes	Interval cytoreductive surgery	No
6484	wildtype	12.0327	37.5448	76.4384	III+IV	Peritoneum	G3	Deceased	Residual disease	No	Primary cytoreductive surgery	No
66264	BRCA1	15.0245	37.479	37.86	III+IV	Fallopian tube	G3	Alive	Residual disease	No	Primary cytoreductive surgery	No
66540	wildtype	21.7313	37.3804	64.1726	III+IV	Ovary	G3	Alive	No residual disease	Yes	Interval cytoreductive surgery	No
66390	wildtype	10.3889	37.3475	60.463	I+II	Ovary	G3	Alive	No residual disease	No	Primary cytoreductive surgery	No
6510	wildtype	18.5094	37.3147	55.0932	III+IV	Fallopian tube	G3	Deceased		Yes	Interval cytoreductive surgery	No
66539	wildtype	18.871	37.1832	70.411	III+IV	Ovary	G3	Deceased	No residual disease	Yes	Interval cytoreductive surgery	No
5625	wildtype	7.00266	37.1832	56.3671	III+IV	Ovary	G2	Deceased	Residual disease	No	Primary cytoreductive surgery	No
1563	BRCA1	15.4848	37.1174	49.11	III+IV	Ovary	G3	Deceased	No residual disease	No	Primary cytoreductive surgery	No
66786	BRCA1	22.323	37.0845	44.1	III+IV	Fallopian tube	G3	Alive	Residual disease	No	Primary cytoreductive surgery	No
66577	wildtype	37.0516	37.0516	73.0219	III+IV	Fallopian tube	G3	Alive	No residual disease	No	Primary cytoreductive surgery	No
5310	wildtype	14.9916	37.0516	33.189	III+IV	Ovary	G3	Deceased	Residual disease	No	Primary cytoreductive surgery	No
66343	wildtype	13.7752	37.0516	67.074	III+IV	Ovary	G3	Alive	Residual disease	Yes	Interval cytoreductive surgery	No
15250	wildtype	9.43551	37.0188	50.1397	III+IV	Peritoneum	G2	Deceased	No residual disease	Yes	Interval cytoreductive surgery	No
2795	wildtype	15.2218	36.8873	70.5534	I+II	Ovary	G3	Deceased	No residual disease	No	Primary cytoreductive surgery	No
66300	wildtype	36.7886	36.7886	73.1397	III+IV	Ovary	G3	Alive	No residual disease	Yes	Interval cytoreductive surgery	No
65652	wildtype	14.6957	36.7229	52.6712	III+IV	Ovary	G3	Deceased	Residual disease	No	Primary cytoreductive surgery	No
65616	wildtype	6.83828	36.7229	53.7233	III+IV	Ovary	G3	Deceased	Residual disease	No	Primary cytoreductive surgery	No
66361	wildtype	15.3861	36.69	74.2904	III+IV	Fallopian tube	G3	Alive	No residual disease	Yes	Interval cytoreductive surgery	No
10703	wildtype	36.6571	36.6571	63.7836	III+IV	Ovary	G3	Alive	Residual disease	No	Primary cytoreductive surgery	No
6460	wildtype	27.7476	36.6243	43.8932	III+IV	Ovary	G3	Deceased	Residual disease	No	Primary cytoreductive surgery	No
5051	wildtype	14.4656	36.6243	50.5397	III+IV	Ovary	G3	Deceased		No	Primary cytoreductive surgery	No
66556	wildtype	10.1259	36.6243	71.7205	III+IV		G3	Deceased		No	other	Yes
4158	wildtype	15.0902	36.5914	63.5808	III+IV	Ovary	G3	Deceased	Residual disease	No	Primary cytoreductive surgery	No
66383	wildtype	19.5286	36.5585	62.6329	III+IV	Peritoneum	G3	Alive	Residual disease	Yes	Interval cytoreductive surgery	No
3334	wildtype	10.5204	36.5585	57.4301	III+IV	Fallopian tube	G3	Deceased	Residual disease	No	Primary cytoreductive surgery	No
6496	wildtype	9.99441	36.5585	70.2247	III+IV	Ovary	G3	Deceased	Residual disease	No	Primary cytoreductive surgery	No
66386	wildtype	8.41635	36.4928	60.0301	III+IV	Peritoneum	G3	Alive	Residual disease	Yes	Interval cytoreductive surgery	No
3660	wildtype	16.9642	36.427	54.4055	I+II	Ovary	G3	Deceased	No residual disease	No	Primary cytoreductive surgery	No
66371	wildtype	36.3941	36.3941	55.0137	III+IV	Fallopian tube	G3	Alive	No residual disease	No	Primary cytoreductive surgery	No
66711	BRCA1	36.3612	36.3612	68.04	III+IV	Fallopian tube	G3	Alive	No residual disease	Yes	Interval cytoreductive surgery	Yes
3256	wildtype	9.63277	36.2297	60.9507	III+IV	Ovary	G2	Deceased	Residual disease	No	Primary cytoreductive surgery	No
66322	wildtype	36.1969	36.1969	58.6767	III+IV	Ovary	G3	Alive	No residual disease	No	Primary cytoreductive surgery	No
66344	wildtype	25.7751	36.164	71.4849	III+IV	Ovary	G3	Alive	No residual disease	No	Primary cytoreductive surgery	No
66247	wildtype	36.1311	36.1311	72.2575	III+IV		G3	Alive	No residual disease	Yes	Interval cytoreductive surgery	No
5921	wildtype	23.7038	36.1311	71.7068		Fallopian tube	G3	Deceased		No	Primary cytoreductive surgery	No
66412	BRCA1	21.0737	36.1311	76.72	III+IV	Ovary		Alive	No residual disease	Yes	Interval cytoreductive surgery	No
66523	BRCA2	36.0982	36.0982	55.64	I+II		G3	Alive	No residual disease	No	Primary cytoreductive surgery	Yes
66561	BRCA1	28.4709	67.5609	69.04	III+IV	Peritoneum	G3	Deceased	Residual disease	Yes	other	Yes
66249	wildtype	36.0325	36.0325	61.411	I+II	Ovary	G3	Alive	No residual disease	No	Primary cytoreductive surgery	No
66680	wildtype	10.5862	35.9667	76.5753	III+IV	Peritoneum	G3	Alive	Residual disease	Yes	Interval cytoreductive surgery	No
3281	BRCA2	30.6408	35.9667	77.72	III+IV	Ovary	G3	Deceased	Residual disease	No	Primary cytoreductive surgery	No
66746	wildtype	25.9394	35.901	71.1315	III+IV	Ovary	G3	Alive	Residual disease	Yes	Interval cytoreductive surgery	No
6265	wildtype	16.1752	35.901	60.3918	III+IV	Ovary	G2	Deceased	Residual disease	No	Primary cytoreductive surgery	No
66427	wildtype	35.8681	35.8681	37.1151	I+II	Ovary	G3	Alive	No residual disease	No	Primary cytoreductive surgery	No
66375	wildtype	35.8352	35.8352	62.5589	III+IV	Ovary	G3	Alive	No residual disease	No	Primary cytoreductive surgery	No
66853	BRCA1	11.4081	35.8352	61.03	III+IV	Ovary	G3	Alive	Residual disease	Yes	Interval cytoreductive surgery	Yes
66662	wildtype	15.419	35.8023	75.9973	III+IV	Fallopian tube	G3	Deceased	No residual disease	No	Primary cytoreductive surgery	No
5963	wildtype	13.019	35.8023	73.6959	III+IV	Ovary	G3	Deceased	No residual disease	Yes	Interval cytoreductive surgery	No
66562	wildtype	35.7366	35.7366	61.6438	I+II	Ovary	G3	Alive	No residual disease	No	Primary cytoreductive surgery	No
6413	wildtype	25.1175	35.7366	74.6795	III+IV	Ovary	G2	Deceased	Residual disease	Yes	Interval cytoreductive surgery	No
2513	wildtype	16.3724	35.7037	75.3315	III+IV	Peritoneum	G3	Deceased	Residual disease	No	Primary cytoreductive surgery	No
66560	wildtype	35.6708	35.6708	50.6548	III+IV	Ovary	G3	Alive	No residual disease	Yes	Interval cytoreductive surgery	Yes
66253	wildtype	21.8628	35.6051	69.2849	III+IV	Ovary	G3	Alive	No residual disease	Yes	Interval cytoreductive surgery	No
66450	wildtype	11.5067	35.4078	72.5014	III+IV	Fallopian tube	G3	Alive	Residual disease	Yes	Interval cytoreductive surgery	No
66294	wildtype	25.3477	35.375	74.126	III+IV	Ovary	G3	Alive	No residual disease	Yes	Interval cytoreductive surgery	No
11254	wildtype	22.8491	35.3421	71.6658	III+IV	Peritoneum	G3	Deceased	Residual disease	No	Primary cytoreductive surgery	No
4194	BRCA1	15.4848	35.2106	51.58	III+IV	Ovary	G3	Deceased	Residual disease	No	Primary cytoreductive surgery	No
66059	wildtype	16.0765	35.1777	72.4301		Ovary	G3	Deceased	Residual disease	No	other	No
66234	wildtype	8.97524	35.1448	60.7397	III+IV	Peritoneum	G3	Deceased	Residual disease	Yes	Interval cytoreductive surgery	No
66532	wildtype	18.2464	35.1119	76.4137	III+IV	Fallopian tube	G3	Deceased	Residual disease	No	other	No
1313	wildtype	16.0765	35.0462	54.1918	III+IV	Peritoneum	G3	Deceased	Residual disease	No	Primary cytoreductive surgery	No
66525	BRCA2	35.0133	35.0133	59.44	III+IV	Ovary	G3	Alive	No residual disease	Yes	Interval cytoreductive surgery	Yes
66502	wildtype	16.3067	34.9804	61.2932	III+IV	Peritoneum	G3	Alive	Residual disease	Yes	other	No
6187	wildtype	7.82457	34.9804	71.4795	III+IV	Peritoneum	G2	Deceased	Residual disease	Yes	Interval cytoreductive surgery	No
66268	wildtype	34.9476	34.9476	43.2411	I+II	Ovary	G3	Alive	No residual disease	No	Primary cytoreductive surgery	No
66636	BRCA2	14.8272	34.9147	54.31	III+IV	Fallopian tube	G3	Alive	Residual disease	No	Primary cytoreductive surgery	Yes
66236	BRCA1	12.6903	34.9147	52.33	III+IV		G3	Deceased	No residual disease	Yes	Interval cytoreductive surgery	No
1096	wildtype	14.9259	34.8818	65.8822	III+IV	Ovary	G3	Deceased	Residual disease	No	Primary cytoreductive surgery	No
66625	wildtype	9.36976	34.8818	72.9397	III+IV	Fallopian tube	G3	Alive	Residual disease	Yes	Interval cytoreductive surgery	No
66781	wildtype	15.156	34.8489	74.2438		Peritoneum	G3	Deceased		Yes		No
66032	wildtype	34.7832	34.7832	58.6548	I+II	Fallopian tube	G3	Alive	No residual disease	No	Primary cytoreductive surgery	No
66323	wildtype	15.9779	34.7503	60.3671	III+IV	Ovary	G3	Alive		No	Primary cytoreductive surgery	No
3176	wildtype	8.77799	34.7174	63.663	III+IV	Ovary	G3	Deceased	Residual disease	No	Primary cytoreductive surgery	No
66372	wildtype	8.51498	34.7174	68.863	III+IV	Ovary		Alive	Residual disease	Yes	other	No
1164	wildtype	12.8875	34.6846	69.2959	III+IV	Ovary	G3	Deceased	Residual disease	No	Primary cytoreductive surgery	No
10700	wildtype	7.26567	34.6846	66.5096	III+IV	Ovary	G3	Deceased	Residual disease	No	Primary cytoreductive surgery	No
3231	BRCA2	7.3643	34.6846	57.91		Ovary	G2	Deceased	Residual disease	No	other	No
66319	wildtype	16.1423	34.5859	72.4356	III+IV	Ovary	G3	Deceased	No residual disease	No	Primary cytoreductive surgery	No
66117	wildtype	11.0136	34.5202	80.4466	III+IV	Ovary	G3	Deceased	Residual disease	No	Primary cytoreductive surgery	No
15272	wildtype	11.441	34.4873	51.9397	III+IV	Ovary	G3	Deceased	Residual disease	No	Primary cytoreductive surgery	No
6138	wildtype	15.1231	34.4544	57.8164	III+IV	Ovary		Deceased	Residual disease	No	Primary cytoreductive surgery	No
66320	wildtype	34.3887	34.3887	66.3452	I+II	Ovary		Alive	No residual disease	No	Primary cytoreductive surgery	No
5899	wildtype	34.2572	34.2572	54.7479	III+IV	Ovary	G2	Deceased	Residual disease	No	Primary cytoreductive surgery	No
639	BRCA1	10.0602	34.1585	61.22	III+IV	Ovary	G3	Deceased	Residual disease	No	Primary cytoreductive surgery	No
66357	wildtype	17.0957	34.1585	58.8986	III+IV	Ovary	G3	Alive	No residual disease	Yes	Interval cytoreductive surgery	No
4422	wildtype	9.30401	34.0928	58.8877	III+IV	Ovary	G3	Deceased	Residual disease	No	Primary cytoreductive surgery	No
7471	BRCA2	16.7341	34.0928	48.64	III+IV	Ovary	G3	Deceased	Residual disease	No	Primary cytoreductive surgery	No
9681	wildtype	28.2408	34.027	78.3041	III+IV	Ovary	G3	Deceased	Residual disease	Yes	Interval cytoreductive surgery	No
847	wildtype	25.7751	34.027	51.8301	III+IV	Ovary	G3	Deceased	No residual disease	No	Primary cytoreductive surgery	No
4538	wildtype	13.6766	33.9941	64.7616	III+IV	Ovary	G3	Deceased	Residual disease	No	Primary cytoreductive surgery	No
11994	wildtype	11.9999	33.9613	41.4712	III+IV	Peritoneum	G3	Deceased	Residual disease	No	Primary cytoreductive surgery	No
4120	wildtype	14.5971	33.9284	68.863	III+IV	Ovary	G2	Deceased	Residual disease	Yes	Interval cytoreductive surgery	No
15224	BRCA1	18.4765	33.8298	55.63	III+IV	Peritoneum	G3	Deceased	Residual disease	No	Primary cytoreductive surgery	No
633	wildtype	13.5451	33.7311	56.4767	III+IV	Ovary	G3	Deceased	No residual disease	No	other	No
10000	BRCA2	10.6519	33.6983	53.57	III+IV	Ovary	G2	Deceased	Residual disease	No	Primary cytoreductive surgery	No
66170	wildtype	11.6382	33.6983	59.3562	III+IV	Peritoneum	G3	Deceased	Residual disease	Yes	Interval cytoreductive surgery	No
9746	wildtype	13.7423	33.6325	57.7699	III+IV	Ovary	G3	Deceased	Residual disease	No	Primary cytoreductive surgery	No
4445	wildtype	13.4793	33.6325	68.6603	III+IV	Ovary	G3	Deceased		No	Primary cytoreductive surgery	No
3812	BRCA2	33.6325	33.6325	56.69	III+IV	Ovary	G3	Alive	No residual disease	No	Primary cytoreductive surgery	No
10922	BRCA1	11.9999	33.6325	43.73	III+IV	Ovary	G3	Deceased	Residual disease	No	Primary cytoreductive surgery	No
15335	wildtype	10.2903	33.501	65.7699	III+IV	Peritoneum	G3	Deceased	Residual disease	Yes	Interval cytoreductive surgery	No
66257	wildtype	14.0711	33.4681	63.5507	III+IV	Fallopian tube	G3	Deceased	No residual disease	No	Primary cytoreductive surgery	No
65603	wildtype	19.3642	33.4353	55.2904	III+IV	Ovary	G2	Deceased	Residual disease	Yes	Interval cytoreductive surgery	No
11131	wildtype	18.4108	33.4024	44.737	III+IV	Fallopian tube	G3	Deceased	Residual disease	No	Primary cytoreductive surgery	No
65938	BRCA1	17.8847	33.3695	35.34	III+IV	Ovary	G3	Deceased	Residual disease	Yes	Primary cytoreductive surgery	No
66780	wildtype	5.65473	33.3366	60.7781	III+IV	Fallopian tube	G3	Alive	No residual disease	Yes	Interval cytoreductive surgery	No
66376	BRCA2	12.2629	33.238	54.03	III+IV	Fallopian tube	G3	Deceased	No residual disease	Yes	Interval cytoreductive surgery	No
15397	BRCA2	14.9916	33.2051	52.76	III+IV	Ovary	G3	Deceased	Residual disease	No	Primary cytoreductive surgery	No
15329	wildtype	18.4436	33.1722	74.0575	III+IV	Ovary	G3	Deceased		Yes	Interval cytoreductive surgery	No
66501	BRCA1	33.1065	33.1065	67.82	I+II	Ovary	G3	Alive	No residual disease	No	Primary cytoreductive surgery	No
4520	wildtype	20.7121	33.0736	48.9096	III+IV	Ovary	G3	Deceased	Residual disease	No	Primary cytoreductive surgery	No
3835	wildtype	11.3095	33.0736	38.7781	III+IV	Ovary	G3	Deceased	Residual disease	No	Primary cytoreductive surgery	No
66308	BRCA2	17.0628	33.0407	61.55	I+II	Ovary	G3	Deceased	No residual disease	No	Primary cytoreductive surgery	No
7182	BRCA2	9.66565	33.0407	58.37	III+IV	Ovary	G2	Deceased	Residual disease	Yes	other	No
11144	wildtype	14.7944	33.0079	37.8603	III+IV	Ovary	G3	Deceased	Residual disease	No	Primary cytoreductive surgery	No
2298	wildtype	8.67936	32.7448	58.2959	III+IV	Peritoneum	G3	Deceased	Residual disease	No	Primary cytoreductive surgery	No
66404	wildtype	18.6409	32.712	57.9836	III+IV	Peritoneum	G3	Deceased	Residual disease	Yes	Interval cytoreductive surgery	No
8785	wildtype	9.33688	32.5147	61.0466	III+IV	Peritoneum	G3	Deceased	Residual disease	No	Primary cytoreductive surgery	No
11313	wildtype	6.47664	32.449	66.9096	III+IV	Ovary	G2	Deceased	Residual disease	No	Primary cytoreductive surgery	No
66360	wildtype	12.0656	32.3503	65.3342	III+IV	Fallopian tube	G3	Deceased	No residual disease	Yes	Interval cytoreductive surgery	No
11450	BRCA2	10.5862	32.3503	74.84	III+IV	Fallopian tube	G3	Deceased	No residual disease	No	Primary cytoreductive surgery	No
66131	wildtype	32.2846	32.2846	59.1616	III+IV	Ovary	G3	Deceased	No residual disease	No		No
12152	wildtype	10.1259	32.0544	43.6	III+IV	Ovary	G3	Deceased	Residual disease	No	Primary cytoreductive surgery	No
4723	wildtype	9.23825	31.9558	51.6082	III+IV	Ovary	G3	Deceased	Residual disease	No	Primary cytoreductive surgery	No
10147	BRCA2	17.819	31.9229	67.77	III+IV	Peritoneum	G2	Deceased	Residual disease	No	Primary cytoreductive surgery	No
8573	BRCA2	10.6519	31.8572	68.35	III+IV	Ovary	G3	Deceased	Residual disease	No	Primary cytoreductive surgery	No
6011	wildtype	8.71223	31.8243	61.8548	III+IV	Ovary	G2	Deceased	No residual disease	Yes	Interval cytoreductive surgery	No
10335	wildtype	9.20538	31.7914	74.6384	III+IV	Peritoneum	G2	Deceased	No residual disease	Yes	Interval cytoreductive surgery	No
65621	wildtype	21.6655	31.7586	68.8521	III+IV	Ovary	G2	Deceased	Residual disease	No	Primary cytoreductive surgery	No
6897	wildtype	8.08758	31.7586	73.2795	III+IV	Ovary	G3	Deceased	Residual disease	No	Primary cytoreductive surgery	No
15308	BRCA1	22.0272	31.7586	67.72	III+IV	Ovary		Deceased	Residual disease	No	Primary cytoreductive surgery	No
1763	wildtype	11.6382	31.7257	63.326	III+IV	Peritoneum	G2	Deceased	Residual disease	Yes	Interval cytoreductive surgery	No
8515	BRCA1	10.6191	31.6928	51.5	III+IV	Ovary	G3	Deceased	Residual disease	No	Primary cytoreductive surgery	No
1056	wildtype	9.13963	31.5613	41.6767	III+IV	Ovary	G3	Deceased	No residual disease	No	Primary cytoreductive surgery	No
66542	wildtype	31.4955	31.4955	63.4932	III+IV	Ovary	G3	Alive	No residual disease	No	Primary cytoreductive surgery	No
8423	wildtype	20.9094	31.4627	47.2877	I+II	Fallopian tube	G3	Deceased	No residual disease	No	Primary cytoreductive surgery	No
1658	BRCA2	10.6	31.3		III+IV	Fallopian tube	G3	Deceased	Residual disease			No
1223	wildtype	18.3779	31.2983	70.6877	III+IV	Ovary	G3	Deceased	Residual disease	No	Primary cytoreductive surgery	No
11007	wildtype	13.3807	31.2654	47.5397	III+IV	Ovary	G3	Deceased	Residual disease	Yes	Interval cytoreductive surgery	No
10078	wildtype	8.44922	31.1997	60.1096	III+IV	Ovary	G2	Deceased	Residual disease	Yes	Interval cytoreductive surgery	No
6009	wildtype	9.92866	31.0682	46.1644	III+IV	Ovary	G2	Deceased	No residual disease	No	Primary cytoreductive surgery	No
4066	BRCA1	8.35059	31.0024	61.88	III+IV	Ovary	G2	Deceased	Residual disease	No	Primary cytoreductive surgery	No
2313	wildtype	12.4601	30.9366	56.8658	III+IV	Ovary	G2	Deceased	Residual disease	No	Primary cytoreductive surgery	No
15394	wildtype	30.9038	30.9038	67.8356	III+IV	Ovary	G3	Deceased	No residual disease	No	Primary cytoreductive surgery	No
6342	wildtype	11.4738	30.8709	58.7589	III+IV	Ovary	G3	Deceased		No	Primary cytoreductive surgery	No
65629	BRCA2	16.7669	30.8051	48.55	III+IV	Ovary		Deceased	Residual disease	Yes	other	No
65863	wildtype	30.8051	30.8051	57.3781	III+IV	Ovary	G3	Deceased		No		No
65615	wildtype	30.8051	30.8051	65.7205	III+IV	Ovary		Alive	No residual disease	Yes	Interval cytoreductive surgery	No
66369	wildtype	16.9971	30.6736	60.4	III+IV	Ovary		Deceased	No residual disease	Yes	Interval cytoreductive surgery	No
66749	BRCA2	12.8218	30.6408	77.19	III+IV	Ovary	G3	Deceased	No residual disease	Yes	Interval cytoreductive surgery	No
66536	BRCA2	30.4106	30.4106	55.93	III+IV	Ovary	G3	Alive	Residual disease	No	Primary cytoreductive surgery	Yes
11839	BRCA2	9.86291	30.3449	44.06	III+IV	Fallopian tube	G2	Deceased	Residual disease	No	Primary cytoreductive surgery	No
65841	wildtype	30.3449	30.3449	68.9644		Ovary	G3	Alive	No residual disease	Yes	Interval cytoreductive surgery	No
8057	wildtype	11.9999	30.3449	58.0466	III+IV	Ovary	G3	Deceased	Residual disease	No	Primary cytoreductive surgery	No
15214	wildtype	12.8547	30.312	56.1425	III+IV	Ovary	G3	Deceased	Residual disease	Yes	Interval cytoreductive surgery	No
9884	wildtype	7.29855	30.2462	66.0329	III+IV	Ovary	G3	Deceased	Residual disease	Yes	Interval cytoreductive surgery	No
15317	BRCA1	11.2437	30.2462	62.39	III+IV	Ovary	G3	Deceased	Residual disease	No	Primary cytoreductive surgery	No
15413	wildtype	30.0819	30.0819	73.4877	III+IV	Ovary	G3	Deceased	Residual disease	No	Primary cytoreductive surgery	No
65635	wildtype	9.92866	29.9832	51.9205	III+IV	Peritoneum		Deceased	No residual disease	Yes	Interval cytoreductive surgery	No
10674	wildtype	9.92866	29.9504	67.5836	III+IV	Ovary	G3	Deceased	No residual disease	No	Primary cytoreductive surgery	No
11231	BRCA1	9.66565	29.9504	44.92	III+IV	Ovary	G3	Deceased	Residual disease	No	Primary cytoreductive surgery	No
6270	wildtype	9.20538	29.8846	54.7205	III+IV	Ovary	G3	Deceased	Residual disease	No	Primary cytoreductive surgery	No
10516	wildtype	10.8163	29.7531	60.0959	III+IV	Ovary	G3	Deceased	Residual disease	No	Primary cytoreductive surgery	No
66228	wildtype	14.1697	29.5887	59.1589	III+IV	Ovary	G3	Alive	Residual disease	Yes	Interval cytoreductive surgery	No
7899	wildtype	12.9204	29.5887	42.9151	III+IV	Ovary	G3	Deceased	Residual disease	No	Primary cytoreductive surgery	No
3692	wildtype	8.97524	29.5887	44.8521	III+IV	Peritoneum	G3	Deceased	Residual disease	No	Primary cytoreductive surgery	No
65872	wildtype	15.3204	29.5558	61.6	III+IV	Peritoneum	G3	Deceased	Residual disease	No	Primary cytoreductive surgery	No
9171	wildtype	14.4656	29.4901	57.4411	III+IV	Ovary	G3	Deceased	Residual disease	No	Primary cytoreductive surgery	No
65930	wildtype	11.7369	29.4572	74.6274	III+IV	Peritoneum	G3	Deceased	Residual disease	No	Primary cytoreductive surgery	No
66384	wildtype	15.5176	29.3257	61.926	III+IV	Ovary	G3	Deceased	Residual disease	Yes	Interval cytoreductive surgery	No
9916	wildtype	14.0711	29.3257	57.8548	III+IV	Ovary	G2	Deceased	Residual disease	No	Primary cytoreductive surgery	No
6977	wildtype	13.3478	29.3257	43.9123	III+IV	Ovary	G3	Deceased	Residual disease	No	Primary cytoreductive surgery	No
66382	wildtype	10.4218	29.3257	47.6055	III+IV	Ovary	G3	Deceased		No	Primary cytoreductive surgery	No
7514	wildtype	18.8381	29.2271	74.5288	III+IV	Ovary	G3	Deceased	No residual disease	No	Primary cytoreductive surgery	No
5405	wildtype	17.1943	29.1613	55.1589	I+II	Ovary	G3	Deceased	No residual disease	Yes	Interval cytoreductive surgery	No
65605	wildtype	7.3643	29.1613	49.9699	III+IV	Ovary	G3	Deceased	Residual disease	No	Primary cytoreductive surgery	No
10336	wildtype	4.93145	29.1284	66.463	III+IV	Peritoneum	G3	Deceased	Residual disease	Yes	Interval cytoreductive surgery	No
65610	BRCA1	14.7286	29.0298	61.55	I+II	Fallopian tube	G3	Deceased	No residual disease	No	Primary cytoreductive surgery	No
11236	wildtype	11.3423	28.9641	65.3068	III+IV	Ovary	G3	Deceased	Residual disease	Yes	Interval cytoreductive surgery	No
11110	wildtype	16.1752	28.9312	57.7096	III+IV	Peritoneum	G3	Deceased	Residual disease	No	Primary cytoreductive surgery	No
9777	wildtype	7.2328	28.9312	58.3534	III+IV	Ovary	G3	Deceased	Residual disease	No	Primary cytoreductive surgery	No
4756	wildtype	19.2655	28.8983	67.7452	III+IV	Ovary		Deceased	Residual disease	No	Primary cytoreductive surgery	No
4376	wildtype	12.8875	28.8983	72.1397	III+IV	Ovary	G3	Deceased	No residual disease	No	Primary cytoreductive surgery	No
66299	BRCA2	12.6574	28.8983	46.31	III+IV	Ovary	G3	Deceased	No residual disease	Yes	Interval cytoreductive surgery	No
9062	wildtype	19.9231	28.7997	76.5726	III+IV	Ovary	G2	Deceased	Residual disease	No	Primary cytoreductive surgery	No
3612	wildtype	21.6326	28.7668	58.9726	III+IV	Ovary	G3	Deceased	Residual disease	No	Primary cytoreductive surgery	No
15319	wildtype	11.1122	28.7668	55.9315	III+IV	Ovary	G3	Deceased	Residual disease	No	Primary cytoreductive surgery	No
65972	wildtype	14.2026	28.7339	45.7233	III+IV	Peritoneum	G3	Deceased	Residual disease	No	Primary cytoreductive surgery	No
1973	wildtype	13.3478	28.5695	57.1205	III+IV	Ovary	G2	Deceased	No residual disease	No	Primary cytoreductive surgery	No
10692	wildtype	11.967	28.5695	65.2548	III+IV	Ovary		Deceased		Yes	Interval cytoreductive surgery	No
7955	wildtype	8.77799	28.5367	68.0849	III+IV	Peritoneum	G3	Deceased	Residual disease	No	Primary cytoreductive surgery	No
6331	wildtype	13.5451	28.438	62.4082	III+IV	Ovary	G3	Deceased		No	Primary cytoreductive surgery	No
5643	BRCA2	6.87116	28.4052	63.47	III+IV	Peritoneum	G2	Deceased	No residual disease	Yes	Interval cytoreductive surgery	No
10319	wildtype	4.96433	28.4052	70.2959		Ovary	G3	Deceased	Residual disease	Yes	Interval cytoreductive surgery	No
15217	wildtype	12.3944	28.3065	77.8438	III+IV	Ovary	G3	Deceased	Residual disease	No	Primary cytoreductive surgery	No
3962	wildtype	8.97524	28.2737	66.3507	III+IV	Ovary	G3	Deceased	Residual disease	No	Primary cytoreductive surgery	No
66797	wildtype	11.0793	28.2408	45.2438	III+IV	Fallopian tube	G3	Deceased	Residual disease	No	Primary cytoreductive surgery	No
66251	wildtype	23.1121	28.1422	69.874	III+IV	Peritoneum	G3	Alive	No residual disease	Yes	Interval cytoreductive surgery	No
1901	wildtype	12.0985	28.1093	56.2658	III+IV	Peritoneum	G3	Deceased	Residual disease	No	other	No
8970	wildtype	18.608	28.0764	53.7205	III+IV	Ovary	G3	Deceased	Residual disease	No	Primary cytoreductive surgery	No
66349	wildtype	11.5725	27.9449	58.7479	III+IV	Ovary	G3	Deceased	Residual disease	Yes	Interval cytoreductive surgery	No
66626	wildtype	27.912	27.912	60.3068	I+II	Fallopian tube	G3	Alive	No residual disease	No	Primary cytoreductive surgery	No
1615	wildtype	13.2492	27.8791	66.8493	III+IV	Ovary	G3	Deceased	Residual disease	No	Primary cytoreductive surgery	No
5345	wildtype	11.4738	27.8791	66.7123	III+IV	Ovary	G3	Deceased		Yes	Interval cytoreductive surgery	No
6010	wildtype	11.1451	27.7805	74.7808	III+IV	Peritoneum	G2	Deceased	Residual disease	Yes	Interval cytoreductive surgery	No
2595	BRCA1	8.51498	27.7805	57.48	III+IV	Ovary	G2	Deceased	Residual disease	No	Primary cytoreductive surgery	No
11346	wildtype	7.56156	27.7148	72.8411	III+IV	Ovary	G3	Deceased	Residual disease	No	Primary cytoreductive surgery	No
1345	BRCA1	27.5504	27.5504	79.22	III+IV	Ovary	G3	Deceased	Residual disease	No	Primary cytoreductive surgery	No
65593	wildtype	27.5504	27.5504	59.463	III+IV	Ovary		Alive	Residual disease	Yes	Interval cytoreductive surgery	No
3958	wildtype	13.6108	27.5175	53.8082	III+IV	Ovary	G3	Deceased	Residual disease	No	Primary cytoreductive surgery	No
8142	wildtype	9.30401	27.5175	55.9096	III+IV	Ovary	G3	Deceased	No residual disease	No	Primary cytoreductive surgery	No
66245	wildtype	14.2026	27.4846	70.8	III+IV	Fallopian tube	G3	Deceased	Residual disease	Yes	Interval cytoreductive surgery	No
7700	wildtype	15.2875	27.4518	61.4274	III+IV	Ovary	G3	Deceased		No	Primary cytoreductive surgery	No
10106	BRCA2	12.6574	27.3531	63.53	III+IV	Peritoneum	G3	Deceased	No residual disease	Yes	Interval cytoreductive surgery	No
5037	wildtype	8.28484	27.3531	60.8411	III+IV	Ovary	G2	Deceased	Residual disease	No	Primary cytoreductive surgery	No
7329	wildtype	18.4436	27.3202	49.0603	III+IV	Ovary	G3	Deceased	Residual disease	No	Primary cytoreductive surgery	No
66547	wildtype	21.9285	27.1887	69.3315	III+IV		G3	Alive	No residual disease	Yes	Interval cytoreductive surgery	No
15311	wildtype	3.51777	27.1887	70.7644		Ovary		Deceased	Residual disease	No	Primary cytoreductive surgery	No
2059	wildtype	10.9807	27.1559	66.2767		Peritoneum	G3	Deceased		No	Primary cytoreductive surgery	No
66572	wildtype	22.4217	27.123	56.1123	III+IV		G3	Alive	No residual disease	Yes	Interval cytoreductive surgery	No
11434	wildtype	9.63277	27.0901	58.2575	III+IV	Peritoneum	G3	Deceased	Residual disease	Yes	Interval cytoreductive surgery	No
66391	wildtype	12.23	27.0244	65.7479	III+IV	Ovary	G3	Deceased	Residual disease	Yes	Interval cytoreductive surgery	No
3102	wildtype	6.96979	27.0244	44.726	III+IV	Ovary	G2	Deceased	Residual disease	No	Primary cytoreductive surgery	No
5692	wildtype	14.0711	26.9915	61.7808	III+IV	Peritoneum	G3	Deceased	Residual disease	No	Primary cytoreductive surgery	No
66309	wildtype	10.093	26.9915	57.737	III+IV	Peritoneum	G3	Deceased	Residual disease	Yes	Interval cytoreductive surgery	No
8058	wildtype	11.0465	26.8929	66.9178	III+IV	Ovary	G3	Deceased	Residual disease	No	Primary cytoreductive surgery	No
9919	wildtype	11.2437	26.7614	62.0027	III+IV	Peritoneum	G2	Deceased	Residual disease	Yes	Interval cytoreductive surgery	No
66842	BRCA1	11.0136	26.6298	57.72		Ovary	G3	Deceased	Residual disease	No	other	Yes
15331	wildtype	9.13963	26.597	67.3753		Ovary		Deceased	Residual disease	No	Primary cytoreductive surgery	No
66667	wildtype	25.8737	26.4983	55.4986	I+II	Fallopian tube	G3	Alive	No residual disease	No	Primary cytoreductive surgery	No
7808	wildtype	11.0465	26.4983	44.5205	III+IV	Ovary	G3	Deceased	Residual disease	No	Primary cytoreductive surgery	No
66137	BRCA1	8.25196	26.3997	51.58	III+IV	Ovary	G3	Deceased	Residual disease	No	Primary cytoreductive surgery	No
66270	wildtype	26.334	26.334	58.7945	III+IV	Ovary	G3	Alive	No residual disease	No	Primary cytoreductive surgery	No
66659	BRCA1	8.25196	26.2682	47.95	III+IV	Fallopian tube	G3	Deceased	Residual disease	Yes	Interval cytoreductive surgery	No
4065	BRCA1	13.6437	26.2353	47	III+IV	Ovary	G3	Deceased	No residual disease	No	Primary cytoreductive surgery	No
15330	wildtype	7.66019	26.2353	66.789	III+IV	Peritoneum	G3	Deceased	Residual disease	No	Primary cytoreductive surgery	No
12214	wildtype	9.23825	26.1696	78.4603	III+IV	Ovary	G3	Deceased	Residual disease	No	Primary cytoreductive surgery	No
10334	wildtype	10.6519	26.1038	59.6849	III+IV	Ovary	G2	Deceased	Residual disease	Yes	Interval cytoreductive surgery	No
66411	wildtype	8.05471	26.1038	66.8712	III+IV	Peritoneum	G3	Deceased	Residual disease	Yes	Interval cytoreductive surgery	Yes
8385	wildtype	11.3423	26.0381	74.0192	III+IV	Ovary	G3	Deceased	Residual disease	No	Primary cytoreductive surgery	No
7725	wildtype	10.6191	26.0381	53.0767	III+IV	Ovary	G3	Deceased	Residual disease	No	Primary cytoreductive surgery	No
11608	wildtype	11.5725	25.8079	73.5534	III+IV	Peritoneum	G2	Deceased	Residual disease	No	Primary cytoreductive surgery	No
9344	wildtype	13.4136	25.7422	45.6548	III+IV	Ovary	G3	Deceased	Residual disease	No	Primary cytoreductive surgery	No
11130	wildtype	15.9122	25.7093	57.0904	III+IV	Ovary	G3	Deceased	Residual disease	No	Primary cytoreductive surgery	No
66448	wildtype	15.682	25.7093	71.5096	III+IV	Ovary	G3	Alive	No residual disease	Yes	Interval cytoreductive surgery	No
1229	wildtype	12.8218	25.6764	60.8986	III+IV	Ovary	G3	Deceased	No residual disease	No	Primary cytoreductive surgery	No
9540	BRCA2	22.5203	25.6107	60.81	III+IV	Ovary	G3	Deceased	No residual disease	No	Primary cytoreductive surgery	No
3067	wildtype	11.704	25.5449	47.8877	III+IV	Ovary	G2	Deceased	Residual disease	Yes	Interval cytoreductive surgery	No
6597	wildtype	18.5423	25.4134	72.8795	III+IV	Ovary	G3	Deceased	Residual disease	No	Primary cytoreductive surgery	No
10894	wildtype	4.10954	25.3805	64.4164	III+IV	Ovary	G3	Deceased	Residual disease	No	Primary cytoreductive surgery	No
66672	wildtype	16.3395	25.3148	68.5397	I+II	Ovary	G3	Alive	No residual disease	No	Primary cytoreductive surgery	No
10238	wildtype	13.3807	25.249	75.3534	III+IV	Peritoneum	G3	Deceased	Residual disease	Yes	Interval cytoreductive surgery	No
66396	BRCA1	22.8162	25.1833	55.57	III+IV	Ovary	G3	Alive	No residual disease	No	Primary cytoreductive surgery	Yes
65974	wildtype	25.1504	25.1504	61.9781	III+IV	Ovary		Deceased		No	Primary cytoreductive surgery	No
8239	wildtype	12.3944	25.0518	52.4137	III+IV	Ovary	G3	Deceased	No residual disease	No	Primary cytoreductive surgery	No
12155	wildtype	11.704	25.0518	77.063	III+IV	Ovary	G2	Deceased	Residual disease	No	Primary cytoreductive surgery	No
5504	wildtype	10.6191	25.0518	73.137	III+IV	Ovary	G3	Deceased	Residual disease	No	Primary cytoreductive surgery	No
15441	wildtype	11.3423	24.986	55.6685	III+IV	Ovary	G3	Deceased	Residual disease	No	Primary cytoreductive surgery	No
66558	wildtype	7.72594	24.9203	65.7397	III+IV		G3	Alive	Residual disease	Yes	Interval cytoreductive surgery	No
66254	wildtype	10.093	24.8874	75.1123	III+IV	Peritoneum	G3	Alive	No residual disease	Yes	other	No
66330	wildtype	5.45747	24.8874	66.6027	III+IV	Ovary	G3	Deceased	Residual disease	No	Primary cytoreductive surgery	No
66503	BRCA1	16.7012	24.8216	48.45	III+IV		G3	Alive	No residual disease	Yes	Interval cytoreductive surgery	Yes
3587	wildtype	12.6903	24.7559	61.0575	I+II	Fallopian tube	G3	Deceased	No residual disease	No	Primary cytoreductive surgery	No
7778	wildtype	9.50127	24.723	57.8877	III+IV	Ovary	G2	Deceased	Residual disease	No	Primary cytoreductive surgery	No
66423	wildtype	16.3067	24.6573	62.8986	III+IV	Ovary	G3	Alive	Residual disease	No	Primary cytoreductive surgery	No
66128	wildtype	11.8026	24.6573	69.0603	III+IV	Ovary	G3	Alive	Residual disease	No		No
66582	BRCA1	19.6929	24.6244	43.58	III+IV		G3	Alive	No residual disease	Yes	Interval cytoreductive surgery	Yes
9861	wildtype	16.1752	24.6244	74.2521	III+IV	Ovary	G3	Deceased	No residual disease	No	Primary cytoreductive surgery	No
66239	wildtype	15.3204	24.5915	68.1562	III+IV	Ovary	G3	Alive	Residual disease	Yes	Interval cytoreductive surgery	No
66569	wildtype	20.8765	24.5586	64.0904	III+IV	Ovary	G3	Alive	No residual disease	No	Primary cytoreductive surgery	No
1667	wildtype	12.1971	24.5258	66.7205	III+IV	Ovary	G3	Deceased	Residual disease	No	Primary cytoreductive surgery	No
66313	wildtype	24.46	24.46	67.7233	III+IV	Fallopian tube	G3	Alive	No residual disease	No	Primary cytoreductive surgery	No
66617	BRCA2	24.3614	24.3614	57.02	III+IV		G3	Alive	No residual disease	Yes	Interval cytoreductive surgery	Yes
66579	wildtype	14.63	24.2956	68.189	III+IV	Fallopian tube	G3	Alive		Yes	Interval cytoreductive surgery	No
5018	wildtype	12.4601	24.2956	57.9425	III+IV	Ovary	G3	Deceased	Residual disease	No	Primary cytoreductive surgery	No
66581	wildtype	15.2546	24.197	66.6082	III+IV		G3	Alive	No residual disease	Yes	Interval cytoreductive surgery	No
66230	wildtype	11.9999	24.1641	66.674	III+IV	Ovary	G3	Deceased	No residual disease	No	Primary cytoreductive surgery	No
66623	wildtype	24.1312	24.1312	69.6164	III+IV	Ovary	G3	Alive	Residual disease	Yes	Interval cytoreductive surgery	Yes
15287	wildtype	13.019	24.1312	52.1096	III+IV	Ovary	G2	Deceased	Residual disease	No	Primary cytoreductive surgery	No
8478	wildtype	8.02183	24.0984	64.3644	III+IV	Ovary	G2	Deceased	Residual disease	No	Primary cytoreductive surgery	No
3571	wildtype	8.54785	24.0655	63.5096	III+IV	Ovary	G3	Deceased	Residual disease	No	Primary cytoreductive surgery	No
66785	wildtype	17.9834	23.9669	58.8877	I+II	Ovary	G3	Deceased	No residual disease	No	Primary cytoreductive surgery	No
66710	wildtype	15.4848	23.9669	64.6932	III+IV	Ovary	G3	Deceased	Residual disease	No	Primary cytoreductive surgery	No
66576	wildtype	15.3533	23.9669	74.7123	III+IV	Ovary	G3	Alive	No residual disease	No	Primary cytoreductive surgery	No
8495	wildtype	12.1971	23.934	72.189	III+IV	Ovary	G3	Deceased	No residual disease	No	Primary cytoreductive surgery	No
66505	BRCA2	23.934	23.934	62.31	I+II	Ovary	G3	Alive	No residual disease	No	other	No
66795	wildtype	10.8492	23.9011	61.1068	III+IV	Fallopian tube	G3	Alive	Residual disease	No	Primary cytoreductive surgery	No
5103	wildtype	14.367	23.8025	59.5781	III+IV	Ovary	G3	Deceased	Residual disease	No	Primary cytoreductive surgery	No
66315	wildtype	12.6903	23.7696	68.7151	III+IV	Fallopian tube	G3	Alive	No residual disease	No	Primary cytoreductive surgery	No
66675	BRCA1	23.7367	23.7367	56.56	III+IV	Ovary	G3	Alive	No residual disease	No	Primary cytoreductive surgery	No
66775	BRCA1	23.6381	23.7367	55.98	III+IV	Ovary	G3	Deceased	No residual disease	Yes	Interval cytoreductive surgery	Yes
2307	wildtype	11.8355	23.7038	49.3178	III+IV	Ovary	G3	Deceased	Residual disease	No	other	No
4309	wildtype	8.25196	23.7038	50.2767	III+IV	Ovary	G3	Deceased	No residual disease	Yes	Interval cytoreductive surgery	No
66567	wildtype	23.671	23.671	59.7397	III+IV	Ovary	G3	Alive	Residual disease	No	Primary cytoreductive surgery	Yes
15243	wildtype	12.756	23.671	72.463	III+IV	Peritoneum	G3	Alive	Residual disease	Yes	Interval cytoreductive surgery	No
65947	wildtype	9.83003	23.671	57.1342	III+IV	Peritoneum	G3	Deceased	Residual disease	No	Primary cytoreductive surgery	No
66666	BRCA1	11.4738	23.671	38.04	III+IV	Fallopian tube	G3	Alive	No residual disease	Yes	Interval cytoreductive surgery	No
66819	BRCA1	17.3258	23.6381	56.63	III+IV	Ovary	G3	Alive	Residual disease	No	Primary cytoreductive surgery	No
4693	wildtype	15.156	23.6381	60.8822	III+IV	Ovary	G2	Deceased	Residual disease	Yes	Interval cytoreductive surgery	No
5309	wildtype	9.66565	23.6381	69.9781	III+IV	Peritoneum	G3	Deceased	Residual disease	No	Primary cytoreductive surgery	No
66132	wildtype	10.9807	23.5723	69.2384	III+IV	Peritoneum	G3	Deceased	Residual disease	No	Primary cytoreductive surgery	No
66642	wildtype	9.33688	23.5395	61.526	III+IV	Peritoneum	G3	Deceased	No residual disease	Yes	Interval cytoreductive surgery	No
66847	wildtype	14.4985	23.4737	64.0986	I+II	Ovary	G3	Alive	No residual disease	No	Primary cytoreductive surgery	No
11894	wildtype	5.9835	23.4737	75.2219	III+IV	Ovary	G3	Deceased	Residual disease	No	Primary cytoreductive surgery	No
66805	BRCA1	23.4408	23.4408	50.71	I+II	Fallopian tube	G3	Alive	No residual disease	No	Primary cytoreductive surgery	No
2934	wildtype	11.8684	23.4408	52.6082	III+IV	Ovary	G3	Deceased	Residual disease	Yes	Interval cytoreductive surgery	No
66706	wildtype	23.3093	23.3093	61.7699	III+IV	Ovary	G3	Alive	No residual disease	No	Primary cytoreductive surgery	No
9331	wildtype	22.3888	23.3093	56.4932	III+IV	Ovary	G3	Deceased	Residual disease	No	Primary cytoreductive surgery	No
11541	wildtype	10.0602	23.2765	53.4575	III+IV	Ovary	G2	Deceased	Residual disease	Yes	Interval cytoreductive surgery	No
6246	wildtype	7.56156	23.2765	57.4959	I+II	Ovary	G3	Deceased		No	Primary cytoreductive surgery	No
6548	BRCA1	12.6245	23.2436	68.29	III+IV	Ovary	G3	Deceased	No residual disease	No	Primary cytoreductive surgery	No
66359	wildtype	10.8821	23.2107	73.7945	III+IV	Ovary	G3	Alive	Residual disease	Yes	other	No
5503	wildtype	17.9834	23.1778	72.3589	III+IV	Ovary	G3	Deceased	Residual disease	No	Primary cytoreductive surgery	No
66566	wildtype	10.1259	23.1778	63.3014	III+IV		G3	Deceased	Residual disease	Yes	Interval cytoreductive surgery	No
66816	BRCA2	23.1778	23.1778	52.47	I+II	Ovary	G3	Alive	No residual disease	No	Primary cytoreductive surgery	Yes
66637	wildtype	23.1121	23.1121	68.874	III+IV	Ovary	G3	Alive	Residual disease	Yes	Interval cytoreductive surgery	No
66317	wildtype	9.63277	23.1121	56.0712	III+IV	Peritoneum	G3	Alive	No residual disease	Yes	Interval cytoreductive surgery	No
10079	wildtype	13.7423	23.0792	55.0986	III+IV	Ovary	G3	Deceased	Residual disease	No	Primary cytoreductive surgery	No
66727	BRCA1	23.0792	23.0792	64.89	III+IV	Fallopian tube	G3	Alive	Residual disease	No	Primary cytoreductive surgery	Yes
10693	wildtype	8.28484	23.0463	51.3836	III+IV	Ovary	G2	Deceased	No residual disease	No	Primary cytoreductive surgery	No
66693	wildtype	23.0134	23.0134	69.4959	I+II	Fallopian tube	G3	Alive		No	Primary cytoreductive surgery	No
3017	wildtype	8.87662	22.8819	56.2411	III+IV	Ovary	G3	Deceased	Residual disease	Yes	Interval cytoreductive surgery	No
8020	wildtype	8.41635	22.8162	56.2658	III+IV	Ovary	G2	Deceased		No	Primary cytoreductive surgery	No
12207	wildtype	12.8547	22.7833	65.1726	III+IV	Peritoneum	G2	Deceased	Residual disease	Yes	Interval cytoreductive surgery	No
3487	wildtype	11.0465	22.7833	72.8575	III+IV	Ovary	G2	Deceased	Residual disease	No	Primary cytoreductive surgery	No
15276	BRCA1	9.00812	22.6847	55.28	III+IV	Ovary	G3	Deceased	Residual disease	No	Primary cytoreductive surgery	No
6621	wildtype	6.47664	22.6518	56.0658	III+IV	Ovary	G3	Deceased	Residual disease	No	Primary cytoreductive surgery	No
10944	wildtype	9.40264	22.5203	59.9945	III+IV	Ovary	G3	Deceased	Residual disease	No	Primary cytoreductive surgery	No
66356	wildtype	11.6711	22.4874	66.8219	III+IV	Ovary	G3	Deceased	Residual disease	Yes	Interval cytoreductive surgery	No
5622	wildtype	10.3889	22.4874	59.6247	III+IV	Ovary	G3	Deceased	Residual disease	No	Primary cytoreductive surgery	No
1640	wildtype	13.7094	22.4217	51.2301	III+IV	Ovary	G3	Deceased	Residual disease	No	Primary cytoreductive surgery	No
9667	wildtype	12.0327	22.4217	76.989	III+IV	Ovary	G3	Deceased	Residual disease	No	Primary cytoreductive surgery	No
66649	wildtype	8.87662	22.3559	78.3671	III+IV	Fallopian tube	G3	Deceased	Residual disease	Yes	Interval cytoreductive surgery	No
4764	BRCA1	16.2738	22.323	58.55	III+IV	Ovary	G3	Deceased	Residual disease	No	Primary cytoreductive surgery	No
12099	wildtype	8.25196	22.2573	69.7753	III+IV	Ovary	G3	Deceased	Residual disease	No	Primary cytoreductive surgery	No
10863	wildtype	7.3643	22.2573	59.8932	III+IV	Ovary	G3	Deceased	No residual disease	No	Primary cytoreductive surgery	No
66327	BRCA1	22.1915	22.1915	50.05	III+IV	Fallopian tube	G3	Alive	No residual disease	No	Primary cytoreductive surgery	No
11361	wildtype	20.4162	22.1587	62.3808	III+IV	Ovary	G3	Deceased		Yes	Interval cytoreductive surgery	No
10507	wildtype	6.34514	22.1258	78.4438	III+IV	Peritoneum	G3	Deceased	Residual disease	No	Primary cytoreductive surgery	No
8010	wildtype	13.8738	22.0929	73.2055	III+IV	Peritoneum	G2	Deceased	Residual disease	No	Primary cytoreductive surgery	No
1886	wildtype	10.6191	22.0929	56.5507	III+IV	Ovary	G3	Deceased	Residual disease	No	Primary cytoreductive surgery	No
66147	wildtype	22.06	22.06	86.9781	III+IV	Ovary	G3	Alive	No residual disease	No	Primary cytoreductive surgery	No
4505	BRCA1	9.89578	22.06	48.56	III+IV	Ovary	G3	Deceased	Residual disease	No	Primary cytoreductive surgery	No
5154	wildtype	9.30401	22.06	45.2548	III+IV	Peritoneum	G3	Deceased	Residual disease	No	Primary cytoreductive surgery	No
66332	wildtype	19.134	22.0272	72.2247	III+IV	Peritoneum	G3	Alive	Residual disease	No	Primary cytoreductive surgery	No
65942	wildtype	10.8492	21.9943	78.6411	III+IV	Peritoneum		Deceased	No residual disease	No	Primary cytoreductive surgery	No
10483	wildtype	4.73419	21.9614	67.4082	III+IV	Ovary	G2	Deceased		No	Primary cytoreductive surgery	No
66654	BRCA1	21.9285	21.9285	51.17	III+IV	Ovary	G3	Alive	Residual disease	No	Primary cytoreductive surgery	No
15284	BRCA1	9.041	21.9285	40.32	III+IV	Ovary	G3	Deceased	Residual disease	No	Primary cytoreductive surgery	No
66796	wildtype	6.90403	21.8628	72.1671	III+IV	Fallopian tube	G3	Alive	No residual disease	Yes	Interval cytoreductive surgery	No
12206	wildtype	6.6739	21.8299	69.7178	III+IV	Fallopian tube	G2	Deceased	Residual disease	No	Primary cytoreductive surgery	No
6269	BRCA2	10.1588	21.7313	56.81	III+IV	Ovary	G3	Deceased	Residual disease	No	Primary cytoreductive surgery	No
8845	wildtype	14.6629	21.6655	74.0329	III+IV	Ovary	G2	Deceased	Residual disease	No	Primary cytoreductive surgery	No
66528	wildtype	21.5998	21.5998	52.137	III+IV	Ovary	G3	Alive	No residual disease	No	Primary cytoreductive surgery	No
65558	wildtype	8.94237	21.5998	65.389	III+IV	Ovary	G2	Deceased	Residual disease	Yes	Interval cytoreductive surgery	No
66723	wildtype	21.5011	21.5011	41.211	I+II	Ovary	G3	Alive	No residual disease	No	Primary cytoreductive surgery	No
15213	wildtype	13.3149	21.5011	45.0712	III+IV	Ovary	G3	Deceased	Residual disease	No	Primary cytoreductive surgery	No
6860	wildtype	10.093	21.4683	66.7863	III+IV	Peritoneum	G3	Deceased	Residual disease	No	Primary cytoreductive surgery	No
1208	wildtype	5.49035	21.4354	68.4575	III+IV	Ovary	G3	Deceased	Residual disease	No	Primary cytoreductive surgery	No
15321	BRCA1	10.7506	21.4354	51.6	III+IV	Peritoneum	G3	Deceased	Residual disease	No	Primary cytoreductive surgery	No
4669	wildtype	9.20538	21.3368	71.9562	III+IV	Peritoneum	G2	Deceased	Residual disease	Yes	Interval cytoreductive surgery	No
6394	wildtype	6.54239	21.3368	59.074	III+IV	Fallopian tube	G3	Deceased		No	Primary cytoreductive surgery	No
15237	wildtype	8.94237	21.3039	60.4219	III+IV	Ovary	G2	Deceased	Residual disease	Yes	Interval cytoreductive surgery	No
10108	wildtype	17.1615	21.1724	57.1671	III+IV	Ovary	G3	Deceased	Residual disease	No	Primary cytoreductive surgery	No
2332	wildtype	10.4218	21.1724	52.0603	III+IV	Ovary	G2	Deceased	Residual disease	Yes	Interval cytoreductive surgery	No
9118	wildtype	12.1971	21.1395	64.9068	III+IV	Ovary	G3	Deceased	Residual disease	No	Primary cytoreductive surgery	No
1387	wildtype	8.77799	21.1066	62.6521	III+IV	Ovary	G3	Deceased	Residual disease	No	Primary cytoreductive surgery	No
11995	BRCA1	12.9862	21.1066	46.27	III+IV	Peritoneum	G3	Deceased	Residual disease	No	Primary cytoreductive surgery	No
3961	wildtype	12.5916	21.008	58.8082	III+IV	Ovary	G2	Deceased	Residual disease	Yes	Interval cytoreductive surgery	No
66552	wildtype	12.5259	20.9751	76.1096	III+IV		G3	Deceased	No residual disease	Yes	Interval cytoreductive surgery	No
66741	wildtype	11.2766	20.9422	56.0027	III+IV	Fallopian tube	G3	Deceased	Residual disease	No	Primary cytoreductive surgery	Yes
6800	wildtype	6.31226	20.9422	58.8164	III+IV	Ovary	G3	Deceased	Residual disease	No	Primary cytoreductive surgery	No
2695	wildtype	11.4081	20.9094	74.3151	III+IV	Ovary	G2	Deceased	Residual disease	No	Primary cytoreductive surgery	No
15325	wildtype	10.0602	20.8765	78.7616	III+IV	Peritoneum	G3	Deceased	Residual disease	No	Primary cytoreductive surgery	No
66335	BRCA1	3.81366	20.8436	54.44		Peritoneum		Deceased	Residual disease	Yes		No
6397	wildtype	9.23825	20.7779	48.0685	III+IV	Ovary	G2	Deceased	Residual disease	No	Primary cytoreductive surgery	No
3121	wildtype	20.745	20.745	77.0027	III+IV	Peritoneum	G3	Deceased	Residual disease	No	Primary cytoreductive surgery	No
1024	wildtype	10.6519	20.6463	47.8603	III+IV	Ovary	G3	Deceased	Residual disease	No	other	No
8689	wildtype	9.99441	20.6135	35.5699	I+II	Ovary	G2	Deceased	No residual disease	Yes	Interval cytoreductive surgery	No
7299	wildtype	18.4108	20.5806	78.0192	III+IV	Ovary	G3	Deceased		No	Primary cytoreductive surgery	No
7539	wildtype	12.0656	20.5806	69.6137	III+IV	Ovary	G3	Deceased	No residual disease	No	Primary cytoreductive surgery	No
11503	wildtype	5.9835	20.5806	65.2082	III+IV	Peritoneum	G3	Deceased	Residual disease	No	Primary cytoreductive surgery	No
4393	wildtype	8.02183	20.4491	64.1452	III+IV	Peritoneum		Deceased	Residual disease	No	Primary cytoreductive surgery	No
1503	wildtype	13.5779	20.4162	65.137	III+IV	Ovary	G3	Deceased	Residual disease	No	Primary cytoreductive surgery	No
3142	BRCA2	20.3833	20.3833	77.22	I+II	Fallopian tube	G3	Deceased	No residual disease	No	Primary cytoreductive surgery	No
66740	BRCA2	20.3505	20.3505	60.73	I+II	Ovary	G3	Alive	No residual disease	No	Primary cytoreductive surgery	No
66346	wildtype	12.0327	20.3505	77.0959	III+IV	Fallopian tube	G3	Deceased	Residual disease	No	Primary cytoreductive surgery	No
66258	wildtype	9.66565	20.3505	72.3452	III+IV		G3	Deceased	Residual disease	No	Primary cytoreductive surgery	No
65535	wildtype	3.32051	20.2847	72.0055	III+IV	Ovary	G3	Deceased	Residual disease	No	Primary cytoreductive surgery	No
66237	BRCA2	11.1451	20.219	70.37	III+IV	Fallopian tube	G3	Deceased	Residual disease	No	Primary cytoreductive surgery	No
4984	wildtype	11.1451	20.1861	55.4795	III+IV	Ovary	G3	Deceased	Residual disease	No	Primary cytoreductive surgery	No
3269	wildtype	10.3232	20.1861	68.2027	III+IV	Ovary	G2	Deceased	Residual disease	Yes	Interval cytoreductive surgery	No
6263	wildtype	9.83003	20.1203	72.4658	III+IV	Peritoneum	G3	Deceased	Residual disease	No	Primary cytoreductive surgery	No
11485	wildtype	12.8547	20.0546	69.4795	III+IV	Ovary	G2	Deceased	No residual disease	No	Primary cytoreductive surgery	No
2351	wildtype	7.16704	20.0217	55.3014	III+IV	Ovary	G2	Deceased	Residual disease	No	Primary cytoreductive surgery	No
66168	wildtype	6.34514	19.9231	52.8603	III+IV	Ovary	G3	Deceased	Residual disease	Yes	Interval cytoreductive surgery	No
5712	wildtype	10.0602	19.8902	78.7096	I+II	Ovary	G2	Deceased	Residual disease	No	Primary cytoreductive surgery	No
2042	wildtype	7.49581	19.8244	60.3452	III+IV	Peritoneum	G2	Deceased	Residual disease	Yes	Interval cytoreductive surgery	No
2039	BRCA1	9.07387	19.7916	40.56	III+IV	Ovary	G3	Deceased	Residual disease	No	Primary cytoreductive surgery	No
66440	wildtype	19.7587	19.7587	79.3644	III+IV	Fallopian tube	G3	Alive	No residual disease	No	Primary cytoreductive surgery	No
10775	wildtype	6.93691	19.6272	63.6192	III+IV	Ovary	G3	Deceased	Residual disease	No	Primary cytoreductive surgery	No
1824	wildtype	11.0136	19.5943	59.3096	III+IV	Ovary	G3	Deceased	Residual disease	No	Primary cytoreductive surgery	No
65883	wildtype	12.0985	19.5614	68.2082	III+IV	Ovary		Deceased		No	Primary cytoreductive surgery	No
3490	wildtype	6.21363	19.5286	51.4493	III+IV	Ovary	G3	Deceased	Residual disease	No	other	No
1113	wildtype	8.35059	19.4628	57.2164	III+IV	Ovary	G2	Deceased	Residual disease	No	Primary cytoreductive surgery	No
15219	wildtype	11.3752	19.3313	64.8685	III+IV	Ovary	G3	Deceased	Residual disease	No	Primary cytoreductive surgery	No
65899	wildtype	7.9232	19.2984	41.7288	III+IV	Ovary	G3	Deceased	No residual disease	No	Primary cytoreductive surgery	No
15293	wildtype	9.36976	19.2655	61.589	III+IV	Ovary	G3	Deceased	Residual disease	No	Primary cytoreductive surgery	No
15435	wildtype	9.69852	19.2327	55.1589	III+IV	Ovary	G3	Deceased	Residual disease	No	Primary cytoreductive surgery	No
3202	BRCA2	18.2135	19.1998	57.5	III+IV	Ovary	G3	Deceased	Residual disease	No	Primary cytoreductive surgery	No
1329	wildtype	11.4738	19.1669	63.9342	III+IV	Ovary	G3	Deceased	Residual disease	No	Primary cytoreductive surgery	No
15436	wildtype	19.134	19.134	47.926	III+IV	Peritoneum	G3	Alive	Residual disease	No	Primary cytoreductive surgery	No
66389	wildtype	11.4738	19.134	54.3808	III+IV	Ovary	G3	Deceased	Residual disease	Yes	Interval cytoreductive surgery	No
65546	wildtype	10.1259	19.134	75.6137		Ovary	G3	Deceased	Residual disease	No	Primary cytoreductive surgery	No
5868	BRCA1	17.6217	19.0025	66.11	III+IV	Ovary	G3	Deceased	Residual disease	No	Primary cytoreductive surgery	No
9108	wildtype	13.6108	18.871	71.2849	III+IV	Ovary	G3	Deceased	No residual disease	No	Primary cytoreductive surgery	No
66135	wildtype	6.37801	18.7724	80.3014	III+IV	Fallopian tube	G3	Deceased	Residual disease	No	Primary cytoreductive surgery	No
6526	wildtype	10.0602	18.608	59.5014	III+IV	Fallopian tube	G3	Deceased	Residual disease	No	Primary cytoreductive surgery	No
6064	wildtype	12.8547	18.5423	59.5644	III+IV	Ovary	G3	Deceased	No residual disease	No	Primary cytoreductive surgery	No
9646	wildtype	12.5588	18.4765	70.2493	III+IV	Peritoneum	G2	Deceased	Residual disease	Yes	Interval cytoreductive surgery	No
7443	wildtype	10.4876	18.4765	41.337	III+IV	Ovary	G3	Deceased	Residual disease	Yes	Interval cytoreductive surgery	No
66401	wildtype	10.8163	18.4108	76.5918	III+IV	Fallopian tube	G3	Deceased	Residual disease	No	Primary cytoreductive surgery	No
15208	wildtype	9.79715	18.4108	54.5123	III+IV	Ovary	G3	Deceased	Residual disease	No	Primary cytoreductive surgery	No
66261	wildtype	8.74511	18.3779	65.5945		Ovary	G3	Deceased		No	other	No
5761	wildtype	8.21909	18.345	61.0932	III+IV	Peritoneum	G3	Deceased	Residual disease	Yes	Interval cytoreductive surgery	No
66449	wildtype	6.87116	18.2793	60.5753	III+IV	Peritoneum	G3	Deceased		Yes		No
10535	wildtype	11.7697	18.2464	58.0932	III+IV	Peritoneum	G3	Deceased	Residual disease	No	Primary cytoreductive surgery	No
10914	wildtype	2.53148	18.2135	77.5288	III+IV	Peritoneum	G3	Deceased	Residual disease	No	Primary cytoreductive surgery	No
6328	wildtype	12.5916	18.1806	54.9589	III+IV	Ovary	G3	Deceased	Residual disease	No	Primary cytoreductive surgery	No
11746	wildtype	8.15334	18.1806	78.3123	III+IV	Peritoneum	G3	Deceased	Residual disease	No	Primary cytoreductive surgery	No
6675	wildtype	4.33968	18.1477	71.6986	III+IV	Peritoneum	G3	Deceased	Residual disease	Yes	Interval cytoreductive surgery	No
689	wildtype	10.093	18.0491	76.8959	III+IV	Ovary	G3	Deceased	Residual disease	No	Primary cytoreductive surgery	No
9590	wildtype	10.7506	18.0162	69.1699	III+IV	Peritoneum	G3	Deceased	Residual disease	Yes	Interval cytoreductive surgery	No
11415	wildtype	7.13417	18.0162	52.4904	III+IV	Ovary	G3	Deceased	Residual disease	No	Primary cytoreductive surgery	No
2392	wildtype	13.2163	17.819	63.5589	III+IV	Ovary	G3	Deceased	Residual disease	Yes	Interval cytoreductive surgery	No
15289	wildtype	10.0602	17.7861	64.2548	III+IV	Ovary	G3	Deceased	Residual disease	No	Primary cytoreductive surgery	No
65891	wildtype	7.29855	17.7861	34.8493	III+IV	Ovary	G2	Deceased	Residual disease	No	Primary cytoreductive surgery	No
65627	wildtype	10.7177	17.7532	53.8959	III+IV	Ovary	G3	Deceased	No residual disease	Yes	Interval cytoreductive surgery	No
539	wildtype	9.59989	17.7204	75.0521	III+IV	Peritoneum	G3	Deceased	No residual disease	Yes	Interval cytoreductive surgery	No
11135	wildtype	6.41089	17.6875	64.6219	III+IV	Ovary	G3	Deceased	Residual disease	No	Primary cytoreductive surgery	No
66738	wildtype	6.37801	17.5888	60.874	III+IV	Fallopian tube	G3	Deceased	Residual disease	No	Primary cytoreductive surgery	No
66295	wildtype	4.56981	17.5231	77.7123	III+IV		G3	Deceased	Residual disease	Yes	other	No
11709	wildtype	11.704	17.4902	67.2137	III+IV	Ovary	G3	Deceased	Residual disease	No	Primary cytoreductive surgery	No
12066	wildtype	6.21363	17.4573	75.326	III+IV	Ovary	G3	Deceased	Residual disease	Yes	Interval cytoreductive surgery	No
4396	wildtype	17.3258	17.3587	77.6932	III+IV	Ovary	G3	Deceased	Residual disease	No	Primary cytoreductive surgery	No
10218	wildtype	13.3807	17.3587	76.9014	III+IV	Ovary	G3	Deceased	Residual disease	No	other	No
4449	wildtype	12.4273	17.3258	44.263	III+IV	Ovary	G3	Deceased	Residual disease	No	Primary cytoreductive surgery	No
366	wildtype	11.1451	17.3258	50.2932	III+IV	Ovary	G3	Deceased	Residual disease	No	Primary cytoreductive surgery	No
1460	wildtype	9.83003	17.2601	60.5479	III+IV	Peritoneum	G3	Deceased	Residual disease	No	Primary cytoreductive surgery	No
2266	wildtype	10.1588	17.1615	62.7644	III+IV	Ovary	G2	Deceased	No residual disease	No	Primary cytoreductive surgery	No
11504	wildtype	6.34514	17.0957	65.8027	III+IV	Ovary	G3	Deceased	Residual disease	No	Primary cytoreductive surgery	No
11266	wildtype	10.0602	17.03	59.1671	III+IV	Ovary	G2	Deceased		No	Primary cytoreductive surgery	No
7941	wildtype	9.86291	16.7998	77.3671	III+IV	Ovary	G2	Deceased	Residual disease	No	Primary cytoreductive surgery	No
4557	wildtype	7.56156	16.7998	78.0082	III+IV	Ovary	G2	Deceased	Residual disease	No	Primary cytoreductive surgery	No
4429	wildtype	9.40264	16.7669	59.4384	III+IV	Peritoneum	G2	Deceased	Residual disease	No	Primary cytoreductive surgery	No
1271	wildtype	8.94237	16.7012	58.6548	III+IV	Ovary	G3	Deceased	Residual disease	No	Primary cytoreductive surgery	No
66126	wildtype	8.84374	16.7012	60.1699	III+IV		G3	Deceased	Residual disease	No	Primary cytoreductive surgery	No
66255	wildtype	7.66019	16.5368	65.8521	III+IV	Fallopian tube	G3	Deceased	Residual disease	Yes	Interval cytoreductive surgery	No
66541	wildtype	12.23	16.5039	68.5534	III+IV	Ovary	G3	Deceased	Residual disease	Yes	Interval cytoreductive surgery	No
15277	wildtype	11.5725	16.4053	70.989	III+IV	Peritoneum	G3	Deceased	Residual disease	No	Primary cytoreductive surgery	No
12308	wildtype	11.3752	16.4053	66.2137	III+IV	Peritoneum	G3	Deceased	Residual disease	No	Primary cytoreductive surgery	No
4774	wildtype	8.64648	16.4053	72.5342	III+IV	Peritoneum	G3	Deceased	Residual disease	Yes	Interval cytoreductive surgery	No
7486	wildtype	8.15334	16.4053	58.9288	III+IV	Ovary	G3	Deceased	Residual disease	No	Primary cytoreductive surgery	No
10506	wildtype	8.84374	16.3724	65.3123	III+IV	Ovary	G3	Deceased	No residual disease	No	Primary cytoreductive surgery	No
66146	wildtype	12.2958	16.3395	68.8274	III+IV	Ovary	G3	Deceased	Residual disease	Yes	Interval cytoreductive surgery	Yes
2245	wildtype	8.18621	16.3395	67.0027	III+IV	Peritoneum	G3	Deceased	Residual disease	Yes	Interval cytoreductive surgery	No
6802	wildtype	4.24105	16.3395	73.6137		Ovary	G3	Deceased		No	Primary cytoreductive surgery	No
10454	wildtype	10.9807	16.3067	76.6877	III+IV	Peritoneum	G3	Deceased	Residual disease	No	other	No
66768	wildtype	8.77799	16.208	58.9726	III+IV	Ovary	G3	Alive	No residual disease	Yes	Interval cytoreductive surgery	No
66497	wildtype	10.3232	16.0765	68.3205	III+IV		G3	Deceased	Residual disease	Yes	Interval cytoreductive surgery	No
11253	wildtype	7.00266	16.0765	56.411	III+IV	Ovary	G3	Deceased	Residual disease	No	Primary cytoreductive surgery	No
9732	wildtype	15.945	15.945	74.5315	III+IV	Peritoneum	G2	Deceased	Residual disease	No	Primary cytoreductive surgery	No
9713	wildtype	9.96153	15.8793	79.6466	III+IV	Ovary	G3	Deceased	Residual disease	No	Primary cytoreductive surgery	No
65554	wildtype	6.87116	15.7149	53.6904	III+IV	Ovary	G2	Alive	Residual disease	Yes	Interval cytoreductive surgery	No
7492	wildtype	4.99721	15.682	53.7918	III+IV	Peritoneum	G3	Deceased	Residual disease	No	Primary cytoreductive surgery	No
66564	wildtype	15.4519	15.6491	61.9589	III+IV	Ovary	G3	Alive	Residual disease	Yes	Interval cytoreductive surgery	No
12237	wildtype	10.4547	15.6491	56.7589	III+IV	Ovary	G2	Deceased	Residual disease	No	Primary cytoreductive surgery	No
2514	wildtype	10.8492	15.4519	60.5315	III+IV	Ovary	G3	Deceased	Residual disease	Yes	Interval cytoreductive surgery	No
11939	wildtype	10.9807	15.3533	79.7836	III+IV	Peritoneum	G2	Deceased	Residual disease	No	Primary cytoreductive surgery	No
8757	wildtype	7.3643	15.3204	66.0274	III+IV	Ovary	G3	Deceased	Residual disease	Yes	Interval cytoreductive surgery	No
5763	wildtype	10.093	15.2875	60.8384	III+IV	Fallopian tube	G2	Deceased		No	other	No
11629	wildtype	8.94237	15.2875	70.1753	III+IV	Peritoneum	G3	Deceased	Residual disease	No	Primary cytoreductive surgery	No
66627	wildtype	12.8547	15.1889	54.4082	III+IV	Ovary	G3	Deceased	No residual disease	Yes	Interval cytoreductive surgery	No
3284	wildtype	8.90949	15.156	68.663	III+IV	Ovary	G3	Deceased		Yes	Interval cytoreductive surgery	No
66526	wildtype	12.4601	15.0902	54.6849	III+IV	Fallopian tube	G3	Deceased	No residual disease	No	Primary cytoreductive surgery	No
6327	wildtype	9.46839	14.9587	64.9589	III+IV	Ovary	G3	Deceased	No residual disease	No	Primary cytoreductive surgery	No
15252	wildtype	8.97524	14.7944	59.4301	III+IV	Peritoneum	G3	Deceased	Residual disease	Yes	Interval cytoreductive surgery	No
5961	wildtype	9.43551	14.7615	72.9726	III+IV	Peritoneum	G2	Deceased	Residual disease	Yes	Interval cytoreductive surgery	No
12068	wildtype	9.00812	14.7615	54.3315	III+IV	Ovary	G3	Deceased	No residual disease	Yes	Interval cytoreductive surgery	No
15337	wildtype	4.20817	14.7286	47.2438	III+IV	Ovary	G3	Deceased	No residual disease	No	Primary cytoreductive surgery	No
2626	wildtype	8.67936	14.63	77.1233	III+IV	Peritoneum	G2	Deceased	Residual disease	Yes	Interval cytoreductive surgery	No
1902	wildtype	11.967	14.5642	60.1616	III+IV	Ovary	G3	Deceased	Residual disease	No	Primary cytoreductive surgery	No
3133	wildtype	6.93691	14.5642	62.9425	III+IV	Ovary	G2	Deceased	Residual disease	Yes	Interval cytoreductive surgery	No
1655	wildtype	2.63011	14.5313	75.2055	III+IV	Peritoneum	G3	Deceased	Residual disease	No	Primary cytoreductive surgery	No
10618	wildtype	4.8657	14.4656	48.8	III+IV	Ovary	G2	Deceased	Residual disease	Yes	Interval cytoreductive surgery	No
15402	wildtype	7.98895	14.3998	59.863	III+IV	Peritoneum	G3	Deceased	Residual disease	No	Primary cytoreductive surgery	No
12352	wildtype	14.367	14.367	69.0192		Ovary	G2	Alive	No residual disease	No	Primary cytoreductive surgery	No
5120	wildtype	9.69852	14.367	70.5808	III+IV	Ovary	G3	Deceased	Residual disease	No	Primary cytoreductive surgery	No
66700	wildtype	8.58073	14.3012	71.9151	III+IV	Ovary	G3	Alive	Residual disease	Yes	Interval cytoreductive surgery	No
375	wildtype	6.93691	14.3012	72.1781	III+IV	Ovary	G2	Deceased	Residual disease	Yes	Interval cytoreductive surgery	No
1733	wildtype	8.38347	14.2683	58.663	III+IV	Ovary	G2	Deceased	No residual disease	Yes	Interval cytoreductive surgery	No
9841	wildtype	7.59444	14.0711	63.8192		Ovary	G3	Deceased	Residual disease	No	Primary cytoreductive surgery	No
15235	wildtype	5.9835	14.0711	53.5699	III+IV	Peritoneum	G2	Deceased	Residual disease	Yes	Interval cytoreductive surgery	No
65555	BRCA1	8.77799	13.9724	45.07	III+IV	Ovary	G3	Deceased	Residual disease	Yes	Interval cytoreductive surgery	No
5015	wildtype	6.14788	13.9396	63.074	III+IV	Ovary	G3	Deceased	Residual disease	No	Primary cytoreductive surgery	No
4488	wildtype	10.3232	13.9067	59.7808	III+IV	Ovary	G3	Deceased	Residual disease	No	Primary cytoreductive surgery	No
66591	BRCA1	13.8738	13.8738	46.37	III+IV	Ovary	G3	Alive	Residual disease	No	Primary cytoreductive surgery	Yes
1026	wildtype	8.02183	13.8738	51.2712	III+IV	Ovary	G2	Deceased	Residual disease	No	Primary cytoreductive surgery	No
4377	wildtype	6.64102	13.8738	60.2438	III+IV	Ovary	G3	Deceased	Residual disease	No	Primary cytoreductive surgery	No
66802	wildtype	13.7752	13.7752	45.4082	III+IV	Fallopian tube	G3	Alive	Residual disease	No	Primary cytoreductive surgery	No
1300	wildtype	5.16159	13.7752	64.9288	III+IV	Ovary	G2	Deceased	Residual disease	No	Primary cytoreductive surgery	No
6644	wildtype	13.7094	13.7094	63.2247	III+IV	Peritoneum	G3	Deceased	Residual disease	Yes	Interval cytoreductive surgery	No
11158	wildtype	6.60815	13.7094	54.3479	III+IV	Peritoneum	G2	Deceased	No residual disease	Yes	Interval cytoreductive surgery	No
1626	wildtype	9.76428	13.6437	58.6466	III+IV	Peritoneum	G3	Deceased	No residual disease	No	Primary cytoreductive surgery	No
1677	wildtype	8.38347	13.6108	74.2877	III+IV	Peritoneum	G2	Deceased	No residual disease	Yes	Interval cytoreductive surgery	No
11489	BRCA1	10.1259	13.5779	73.91	III+IV	Ovary	G3	Deceased	No residual disease	No	Primary cytoreductive surgery	No
15339	wildtype	10.2574	13.5779	71.0521	III+IV	Peritoneum	G3	Deceased	Residual disease	No	Primary cytoreductive surgery	No
66778	wildtype	13.5451	13.5451	75.5616	III+IV	Ovary	G3	Alive	No residual disease	Yes	Interval cytoreductive surgery	No
66653	wildtype	13.5122	13.5122	59.1288	III+IV		G3	Alive	Residual disease	Yes	Interval cytoreductive surgery	No
66682	wildtype	13.0848	13.2492	49.4137	III+IV	Fallopian tube	G3	Alive	Residual disease	No	Primary cytoreductive surgery	No
4675	wildtype	7.3643	13.2163	74.2247	III+IV	Ovary	G3	Deceased	Residual disease	No	Primary cytoreductive surgery	No
65865	wildtype	4.50406	13.2163	67.0274		Ovary	G2	Deceased	Residual disease	No	Primary cytoreductive surgery	No
66721	wildtype	13.1834	13.1834	68.8712	III+IV	Ovary	G3	Alive	No residual disease	No	Primary cytoreductive surgery	No
7691	wildtype	3.7479	13.1834	62.7151	III+IV	Peritoneum	G3	Deceased	Residual disease	No	Primary cytoreductive surgery	No
11566	wildtype	8.28484	13.1505	58.2849	III+IV	Peritoneum	G3	Deceased	Residual disease	No	Primary cytoreductive surgery	No
66656	wildtype	7.3643	13.1505	66.5233	III+IV	Ovary	G3	Deceased	Residual disease	Yes	Interval cytoreductive surgery	No
10705	wildtype	13.1177	13.1177	62.0795		Ovary		Deceased	Residual disease	No		No
4800	wildtype	3.97804	13.1177	64.5644	III+IV	Ovary	G3	Deceased	Residual disease	No	Primary cytoreductive surgery	No
66784	wildtype	13.0848	13.0848	69.9041	III+IV	Ovary	G3	Alive	No residual disease	No	Primary cytoreductive surgery	No
2867	wildtype	9.10675	13.0848	69.9041	III+IV	Ovary	G2	Deceased	Residual disease	No	Primary cytoreductive surgery	No
10683	wildtype	11.178	12.9533	68.1918	III+IV	Ovary	G2	Deceased	Residual disease	Yes	Interval cytoreductive surgery	No
66554	wildtype	8.90949	12.9533	68.2164	III+IV		G3	Alive		Yes	Interval cytoreductive surgery	No
2064	wildtype	7.7917	12.9533	66.2959	III+IV	Ovary	G2	Deceased	No residual disease	No	Primary cytoreductive surgery	No
11435	wildtype	12.6574	12.6574	78.0055	III+IV	Peritoneum	G3	Deceased	Residual disease	No	Primary cytoreductive surgery	No
4769	wildtype	10.6519	12.5588	49.8658	III+IV	Ovary	G3	Deceased	Residual disease	No	Primary cytoreductive surgery	No
4568	wildtype	7.2328	12.5588	60.7397	III+IV	Ovary	G2	Deceased	Residual disease	No	Primary cytoreductive surgery	No
1952	wildtype	7.13417	12.5259	77.6904	III+IV	Ovary	G3	Deceased	Residual disease	No	Primary cytoreductive surgery	No
66514	BRCA1	12.4601	12.4601	40.03				Alive	No residual disease	No	Primary cytoreductive surgery	No
66632	BRCA1	12.4273	12.4273	71.89	III+IV	Ovary	G3	Alive	No residual disease	Yes	Interval cytoreductive surgery	Yes
2463	wildtype	7.33143	12.4273	63.9945	III+IV	Peritoneum	G3	Deceased	Residual disease	No	Primary cytoreductive surgery	No
15245	BRCA1	5.72049	12.3944	56.09	III+IV	Ovary	G2	Deceased	Residual disease	Yes	Interval cytoreductive surgery	No
66720	wildtype	12.3944	12.3944	69.189	III+IV	Ovary	G3	Alive	Residual disease	Yes	Interval cytoreductive surgery	No
2844	wildtype	7.49581	12.3944	55.7973	III+IV	Ovary	G3	Deceased	Residual disease	No	Primary cytoreductive surgery	No
66712	wildtype	7.00266	12.2958	66.0027	III+IV	Ovary	G3	Alive	Residual disease	Yes	Interval cytoreductive surgery	No
3689	wildtype	5.52323	12.2958	64.611	III+IV	Ovary	G2	Deceased	Residual disease	Yes	Interval cytoreductive surgery	No
7473	wildtype	6.37801	12.0985	62.4137	III+IV	Ovary	G3	Deceased	Residual disease	No	Primary cytoreductive surgery	No
15215	wildtype	10.7834	11.967	79.4986	III+IV	Peritoneum	G2	Deceased	Residual disease	No	Primary cytoreductive surgery	No
15442	wildtype	11.8355	11.8355	56.4247	III+IV	Ovary	G3	Alive	Residual disease	No	Primary cytoreductive surgery	No
1565	wildtype	10.3561	11.8355	48.326	III+IV	Ovary	G3	Deceased	Residual disease	No	Primary cytoreductive surgery	No
11094	BRCA1	7.56156	11.8026	58.42	III+IV	Ovary	G3	Deceased	Residual disease	No	Primary cytoreductive surgery	No
6512	wildtype	11.8026	11.8026	79.2548	III+IV	Ovary	G3	Deceased		No	Primary cytoreductive surgery	No
9520	wildtype	9.69852	11.8026	54.4767	III+IV	Ovary	G3	Deceased	Residual disease	No	Primary cytoreductive surgery	No
8492	wildtype	7.85745	11.7697	63.2137	III+IV	Peritoneum	G2	Deceased	Residual disease	No	Primary cytoreductive surgery	No
15437	wildtype	5.81911	11.7697	61.4767	III+IV	Ovary	G3	Deceased	Residual disease	No	Primary cytoreductive surgery	No
66848	wildtype	11.7369	11.7369	70.7288	III+IV	Ovary	G3	Alive	No residual disease	Yes	Interval cytoreductive surgery	No
6803	wildtype	10.0602	11.7369	65.3068	III+IV	Ovary	G3	Deceased	No residual disease	Yes	Interval cytoreductive surgery	No
66773	wildtype	9.63277	11.7369	62.9452	III+IV	Fallopian tube	G3	Alive	Residual disease	No	Primary cytoreductive surgery	No
5007	BRCA1	10.4547	11.7369	64.3	III+IV	Peritoneum	G3	Deceased	Residual disease	No	Primary cytoreductive surgery	No
11276	wildtype	4.20817	11.704	73.5616	III+IV	Peritoneum	G3	Deceased	Residual disease	No	Primary cytoreductive surgery	No
66655	BRCA1	11.704	11.704	72.83	III+IV	Ovary	G3	Alive	Residual disease	Yes	Interval cytoreductive surgery	Yes
1461	wildtype	11.6711	11.6711	76.5479	III+IV	Ovary	G3	Deceased	Residual disease	Yes	Interval cytoreductive surgery	No
66753	wildtype	11.6054	11.6054	50.9178	III+IV	Ovary	G3	Alive	No residual disease	Yes	Interval cytoreductive surgery	No
66804	wildtype	11.5725	11.5725	57.5945	III+IV	Fallopian tube	G3	Alive	Residual disease	No	Primary cytoreductive surgery	No
15248	wildtype	9.33688	11.5396	74.6603	III+IV	Ovary	G3	Deceased	No residual disease	No	Primary cytoreductive surgery	No
66761	BRCA1	11.4738	11.4738	57.87	I+II	Fallopian tube	G3	Alive	No residual disease	No	Primary cytoreductive surgery	No
7575	wildtype	8.44922	11.4081	64.2384	III+IV	Peritoneum	G3	Deceased	Residual disease	Yes	Interval cytoreductive surgery	No
66708	BRCA2	11.3752	11.3752	71.14	III+IV	Fallopian tube	G3	Alive	Residual disease	Yes	Interval cytoreductive surgery	Yes
4256	wildtype	4.14242	11.3423	46.4219	III+IV	Ovary	G3	Deceased	Residual disease	No	Primary cytoreductive surgery	No
66570	wildtype	8.64648	11.3095	54.9726	III+IV		G3	Deceased	No residual disease	No	Primary cytoreductive surgery	Yes
331	wildtype	5.85199	11.2766	76.6959	III+IV	Ovary	G3	Deceased	Residual disease	No	Primary cytoreductive surgery	No
6051	wildtype	6.77253	11.2437	73.4027	III+IV	Ovary	G2	Deceased	Residual disease	Yes	Interval cytoreductive surgery	No
66838	wildtype	11.2108	11.2108	44.2411	III+IV	Fallopian tube	G3	Alive	No residual disease	No	Primary cytoreductive surgery	No
11331	wildtype	3.55065	11.178	64.674	III+IV	Ovary	G3	Deceased	Residual disease	No	Primary cytoreductive surgery	No
2110	wildtype	11.1122	11.1122	67.3014	III+IV	Ovary	G3	Deceased	Residual disease	No	Primary cytoreductive surgery	No
1866	wildtype	6.44376	11.1122	58.0658	I+II	Ovary	G2	Deceased	Residual disease	Yes	Interval cytoreductive surgery	No
66760	wildtype	10.9478	10.9478	60.6685	III+IV	Ovary	G3	Alive	No residual disease	Yes	Interval cytoreductive surgery	Yes
5052	wildtype	8.4821	10.9149	65.0521	III+IV	Ovary	G3	Deceased		No	Primary cytoreductive surgery	No
66807	BRCA2	10.8821	10.8821	49.51	III+IV	Ovary	G3	Alive	No residual disease	No	Primary cytoreductive surgery	No
66726	wildtype	10.8821	10.8821	61.537	III+IV	Ovary		Alive		Yes		No
5174	wildtype	7.62731	10.8492	55.4932	I+II	Ovary	G3	Alive	No residual disease	No	Primary cytoreductive surgery	No
65542	wildtype	10.7834	10.7834	71.0986	I+II	Ovary	G3	Alive	No residual disease	No	other	No
6428	wildtype	7.9232	10.7834	63.2438	III+IV	Ovary	G2	Deceased	Residual disease	No	Primary cytoreductive surgery	No
448	wildtype	6.34514	10.7834	64.474	III+IV	Ovary	G3	Deceased	Residual disease	No	Primary cytoreductive surgery	No
9526	wildtype	4.3068	10.7177	69.6466	III+IV	Ovary	G3	Deceased	Residual disease	No	Primary cytoreductive surgery	No
66765	wildtype	10.6519	10.6519	73.9781	III+IV	Ovary	G3	Alive	No residual disease	Yes	Interval cytoreductive surgery	No
1678	wildtype	5.68761	10.5204	66.1288	III+IV	Ovary	G2	Deceased	Residual disease	No	Primary cytoreductive surgery	No
66763	BRCA1	10.3561	10.3561	60.15	I+II	Ovary	G3	Alive	No residual disease	No	Primary cytoreductive surgery	Yes
66410	wildtype	4.93145	10.3561	51.8849	III+IV	Ovary	G3	Alive	No residual disease	Yes	Interval cytoreductive surgery	No
11769	wildtype	8.02183	10.2245	61.6493	III+IV	Peritoneum	G3	Deceased	Residual disease	No	Primary cytoreductive surgery	No
12326	wildtype	5.29309	10.1588	74.7973	III+IV	Peritoneum	G3	Deceased	Residual disease	No	Primary cytoreductive surgery	No
4628	wildtype	7.98895	10.093	66.2356	III+IV	Ovary	G3	Deceased	Residual disease	No	Primary cytoreductive surgery	No
66305	wildtype	9.92866	9.92866	59.1096	I+II	Ovary	G3	Alive	Residual disease	No	Primary cytoreductive surgery	No
1052	wildtype	9.89578	9.89578	75.7699	III+IV	Ovary		Deceased		No	Primary cytoreductive surgery	No
3009	wildtype	5.09583	9.83003	68.526	III+IV	Ovary	G3	Deceased	Residual disease	No	Primary cytoreductive surgery	No
66732	wildtype	9.79715	9.79715	76.9452	I+II	Ovary	G3	Alive		No	Primary cytoreductive surgery	No
10925	wildtype	7.29855	9.7314	78.7452	III+IV	Ovary	G3	Deceased	Residual disease	Yes	Interval cytoreductive surgery	No
9813	wildtype	6.64102	9.7314	78.274	III+IV	Peritoneum	G3	Deceased	Residual disease	No	Primary cytoreductive surgery	No
65875	wildtype	6.50952	9.63277	48.6795	III+IV	Ovary	G3	Deceased		Yes		No
66629	wildtype	9.56702	9.56702	72.8247	III+IV	Ovary	G3	Alive	Residual disease	No	Primary cytoreductive surgery	No
10311	wildtype	4.60269	9.53414	73.6986		Fallopian tube	G3	Deceased	No residual disease	No	Primary cytoreductive surgery	No
15438	wildtype	4.04379	9.53414	60.1836	III+IV	Ovary	G3	Deceased	Residual disease	No	Primary cytoreductive surgery	No
66553	wildtype	9.50127	9.50127	74.274	III+IV	Ovary	G3	Alive	No residual disease	No	Primary cytoreductive surgery	No
6716	wildtype	4.89858	9.50127	45.1014	III+IV	Ovary	G3	Deceased	Residual disease	No	Primary cytoreductive surgery	No
15403	wildtype	4.47118	9.46839	49.3616	III+IV	Ovary	G3	Deceased	Residual disease	Yes	Interval cytoreductive surgery	No
9691	wildtype	5.32597	9.43551	58.1397	III+IV	Peritoneum	G3	Deceased	Residual disease	No	Primary cytoreductive surgery	No
6330	wildtype	6.60815	9.40264	45.0712	III+IV	Peritoneum	G3	Deceased	Residual disease	No	Primary cytoreductive surgery	No
9999	wildtype	6.47664	9.33688	65.5945	III+IV	Ovary	G2	Deceased	Residual disease	No	Primary cytoreductive surgery	No
7973	wildtype	5.88487	9.27113	53.9918	III+IV	Ovary	G3	Deceased	Residual disease	No	other	No
3416	wildtype	4.66844	9.1725	67.2356	III+IV	Ovary	G3	Deceased	Residual disease	No	Primary cytoreductive surgery	No
15445	wildtype	6.70678	9.041	63.1644	III+IV	Ovary	G3	Alive	Residual disease	Yes	Interval cytoreductive surgery	No
10441	wildtype	7.26567	8.97524	75.8658	III+IV	Ovary	G2	Deceased	No residual disease	Yes	Interval cytoreductive surgery	No
1304	wildtype	6.96979	8.97524	64.2384	III+IV	Ovary	G3	Deceased	Residual disease	Yes	Interval cytoreductive surgery	No
15444	wildtype	8.94237	8.94237	65.1562	III+IV	Fallopian tube	G3	Alive	Residual disease	No	Primary cytoreductive surgery	No
10780	wildtype	4.96433	8.81086	65.3589	III+IV	Peritoneum	G3	Deceased	Residual disease	Yes	Interval cytoreductive surgery	No
66424	wildtype	7.49581	8.74511	59.3315	III+IV	Ovary	G3	Deceased	No residual disease	No	Primary cytoreductive surgery	No
65967	wildtype	5.75336	8.6136	59.9014	III+IV		G3	Deceased	Residual disease	No	Primary cytoreductive surgery	No
859	wildtype	2.53148	8.31772	73.4219		Ovary	G3	Deceased	Residual disease	Yes	Interval cytoreductive surgery	No
15449	wildtype	8.21909	8.21909	66.9644	III+IV	Fallopian tube	G3	Alive	Residual disease	Yes	Interval cytoreductive surgery	No
66690	wildtype	5.49035	8.18621	58.6959	III+IV	Ovary	G3	Alive	Residual disease	Yes	Interval cytoreductive surgery	No
15447	wildtype	8.15334	8.15334	54.4329	III+IV	Ovary	G3	Alive	Residual disease	No	Primary cytoreductive surgery	No
7059	wildtype	4.96433	7.98895	60.6247	III+IV	Peritoneum	G2	Deceased	Residual disease	No	Primary cytoreductive surgery	No
10621	wildtype	7.10129	7.7917	57.5726	III+IV	Ovary	G3	Deceased	Residual disease	Yes	Interval cytoreductive surgery	No
6521	wildtype	7.56156	7.75882	79.4466	III+IV	Ovary	G3	Deceased	Residual disease	No	Primary cytoreductive surgery	No
66495	wildtype	7.72594	7.72594	60.5068	III+IV		G3	Alive	No residual disease	Yes	Interval cytoreductive surgery	No
66803	wildtype	7.72594	7.72594	65.1205	III+IV	Fallopian tube	G3	Deceased	Residual disease	Yes	Interval cytoreductive surgery	No
66306	wildtype	6.44376	7.56156	59.8932	III+IV	Ovary	G3	Deceased	Residual disease	Yes	Interval cytoreductive surgery	No
65886	wildtype	7.43006	7.43006	75.5425	III+IV	Ovary	G3	Deceased	Residual disease	Yes	Interval cytoreductive surgery	No
1279	wildtype	1.9397	7.06842	76.5123	III+IV	Ovary	G2	Deceased	Residual disease	Yes	Interval cytoreductive surgery	No
5756	wildtype	7.03554	7.03554	66.1836	III+IV	Ovary	G3	Deceased	No residual disease	No	Primary cytoreductive surgery	No
12250	wildtype	6.77253	6.77253	75.8		Ovary		Deceased	Residual disease	No	Primary cytoreductive surgery	No
11474	wildtype	6.73965	6.73965	55.4137	III+IV	Ovary	G3	Deceased	Residual disease	No	Primary cytoreductive surgery	No
15302	wildtype	1.64382	6.70678	59.0356	III+IV	Ovary	G3	Deceased	Residual disease	No	Primary cytoreductive surgery	No
4102	wildtype	6.60815	6.60815	75.8027	III+IV	Ovary	G2	Deceased	Residual disease	No	Primary cytoreductive surgery	No
15406	wildtype	6.41089	6.41089	72.1425	I+II	Fallopian tube	G3	Alive	Residual disease	No	Primary cytoreductive surgery	No
66593	wildtype	4.83282	6.41089	62.8849	III+IV	Ovary	G3	Deceased	Residual disease	Yes	Interval cytoreductive surgery	No
3736	wildtype	3.64928	6.41089	52.474	III+IV	Peritoneum	G3	Deceased	Residual disease	Yes	Interval cytoreductive surgery	No
9222	wildtype	6.37801	6.37801	69.9534	III+IV	Fallopian tube	G3	Deceased	No residual disease	No	other	No
11967	wildtype	1.84108	6.04925	53.8137	III+IV	Ovary	G3	Deceased	Residual disease	No	Primary cytoreductive surgery	No
8294	wildtype	5.81911	5.81911	58.9425	III+IV	Ovary		Deceased		No	Primary cytoreductive surgery	No
1801	BRCA2	2.86024	5.29309	45.2	III+IV	Ovary	G3	Deceased	Residual disease	No	Primary cytoreductive surgery	No
66203	wildtype	5.16159	5.16159	68.8685		Ovary	G3	Alive		No		No
1327	wildtype	5.12871	5.12871	75.3836	III+IV	Peritoneum	G3	Deceased	Residual disease	No	Primary cytoreductive surgery	No
11859	wildtype	4.73419	4.73419	78.6767	III+IV	Peritoneum	G2	Deceased	No residual disease	No	Primary cytoreductive surgery	No
8683	BRCA1	1.70957	4.40543	68.8	III+IV	Ovary	G3	Deceased	Residual disease	No	Primary cytoreductive surgery	No
11332	wildtype	2.26847	4.10954	35.2329	III+IV	Ovary	G3	Deceased	Residual disease	No	Primary cytoreductive surgery	No
4679	wildtype	3.97804	3.97804	73.8822	III+IV	Ovary	G2	Deceased	Residual disease	No	Primary cytoreductive surgery	No
66814	wildtype	3.71503	3.91229	74.4767	III+IV	Fallopian tube	G3	Deceased	Residual disease	No	Primary cytoreductive surgery	No
66699	wildtype	3.64928	3.64928	66.2548	III+IV	Ovary	G3	Alive	No residual disease	No	Primary cytoreductive surgery	No
2792	wildtype	2.99175	3.6164	73.0356	III+IV	Ovary	G3	Deceased	Residual disease	No	Primary cytoreductive surgery	No
5411	wildtype	3.55065	3.55065	74.1945	III+IV	Peritoneum	G3	Deceased	Residual disease	Yes	Interval cytoreductive surgery	No
66333	wildtype	3.48489	3.48489	67.4466	III+IV	Fallopian tube	G3	Alive	No residual disease	No	Primary cytoreductive surgery	No
66685	wildtype	3.28764	3.28764	59.8164	III+IV	Fallopian tube	G3	Alive	Residual disease	No	Primary cytoreductive surgery	No
66713	wildtype	3.09038	3.09038	49.3288	III+IV	Ovary	G3	Alive	No residual disease	No	Primary cytoreductive surgery	No
3188	wildtype	2.79449	2.79449	55.5699	III+IV	Ovary	G2	Deceased	Residual disease	No	Primary cytoreductive surgery	No
66511	BRCA2	2.69586	2.69586	64.23	III+IV	Ovary	G3	Alive	Residual disease	No	Primary cytoreductive surgery	No
66509	wildtype	2.56436	2.56436	47.5068	III+IV	Fallopian tube	G3	Alive	No residual disease	No	Primary cytoreductive surgery	No
7265	wildtype	2.56436	2.56436	79.5068		Ovary	G2	Deceased	Residual disease	No		No
66766	BRCA1	2.4986	2.4986	55.12	III+IV	Fallopian tube	G3	Alive	No residual disease	No	Primary cytoreductive surgery	No
3654	wildtype	2.46573	2.46573	65.5123	III+IV	Ovary	G2	Deceased		No	Primary cytoreductive surgery	No
3787	wildtype	2.33422	2.33422	73.5808	III+IV	Peritoneum	G3	Deceased	Residual disease	No	Primary cytoreductive surgery	No
1454	wildtype	2.23559	2.23559	67.6767	III+IV	Ovary	G2	Deceased	Residual disease	No	Primary cytoreductive surgery	No
66592	wildtype	2.20272	2.20272	71.0904	III+IV	Fallopian tube	G3	Alive	Residual disease	No	Primary cytoreductive surgery	No
7290	wildtype	2.16984	2.16984	61.1616	III+IV	Ovary	G3	Deceased	Residual disease	No	Primary cytoreductive surgery	No
15440	wildtype	1.8082	1.90683	65.9342	III+IV	Ovary	G3	Deceased	Residual disease	No	Primary cytoreductive surgery	No
6318	wildtype	1.74245	1.74245	55.7123	I+II	Ovary	G2	Deceased	Residual disease	No	Primary cytoreductive surgery	No
15242	wildtype	1.15067	1.51231	62.9753		Ovary		Deceased		Yes		No
15434	wildtype	1.38081	1.38081	79.1342	III+IV	Peritoneum	G3	Deceased	Residual disease	No	Primary cytoreductive surgery	No
1664	wildtype	1.15067	1.15067	78.3397		Ovary		Deceased		No		No
12196	wildtype	1.05204	1.05204	63.3041		Ovary	G3	Deceased	Residual disease	No		No
7289	wildtype	0.920538	0.920538	76.9342	III+IV	Peritoneum	G2	Deceased	Residual disease	No	Primary cytoreductive surgery	No
8497	wildtype	0.821909	0.821909	70.7726	III+IV	Ovary	G3	Deceased	No residual disease	No	Primary cytoreductive surgery	No
2554	wildtype	0.756156	0.756156	70.5068	III+IV	Ovary	G3	Deceased	Residual disease	No	Primary cytoreductive surgery	No
4254	wildtype	0.690403	0.690403	76.3315	III+IV	Ovary	G3	Deceased	Residual disease	No	Primary cytoreductive surgery	No
10331	wildtype	0.36164	0.690403	75.7096	III+IV	Ovary	G3	Deceased	Residual disease	No	Primary cytoreductive surgery	No
11551	BRCA1	0.657527	0.657527	61.73	III+IV	Peritoneum	G3	Deceased	Residual disease	No	Primary cytoreductive surgery	No
3223	wildtype	0.624651	0.624651	73.1315	III+IV	Peritoneum	G3	Deceased	Residual disease	No	Primary cytoreductive surgery	No
66844	wildtype			46.0055		Ovary	G3		No residual disease	No	Primary cytoreductive surgery	No
66798	wildtype			84.6959	III+IV	Fallopian tube	G3		No residual disease	No	Primary cytoreductive surgery	No
66758	wildtype			68.0082	III+IV	Ovary	G3		No residual disease	No	Primary cytoreductive surgery	No
66687	wildtype			69.4274	III+IV		G3		Residual disease	No	other	No
66538	wildtype			39.7425		Fallopian tube	G3		No residual disease	No	Primary cytoreductive surgery	No
66533	wildtype			72.2219	III+IV	Ovary	G3		Residual disease	No	Primary cytoreductive surgery	No
66403	wildtype			68.5918	III+IV	Fallopian tube	G3		Residual disease	No	Primary cytoreductive surgery	No
66337	wildtype			47.5178	III+IV	Fallopian tube	G3		Residual disease	No	Primary cytoreductive surgery	No
66510	wildtype			54.6548	III+IV	Fallopian tube	G3		Residual disease	No	Primary cytoreductive surgery	No
66175	BRCA1			51.75	III+IV	Ovary	G3		No residual disease	No	Primary cytoreductive surgery	No
66020	wildtype			55.2274	III+IV	Ovary	G3		No residual disease	No	Primary cytoreductive surgery	No
65606	wildtype			67.1315	III+IV	Ovary	G3		Residual disease	No	Primary cytoreductive surgery	No

## Sheet: Supplementary Table S2
Supplementary Table S2 Mutation type and location BRCA carriers AOCS cohort.
Publication ID	germline BRCA status	Genomic position	Exon	Functional domain	Coding change	Protein coding	Mutation type	Mutation type group	ClinVar variant ID	Global MAF
66232	BRCA1	17: 41244678-41244682	Exon 10/23	DBD	NM_007294.3:c.2866_2870del	p.(Ser956ValfsTer13)	frameshift deletion	Truncating	54702	-
65962	BRCA1	17: 41223242	Exon 15/23	outside domain	NM_007294.3:c.4689C>G	p.(Tyr1563Ter)	nonsense	Truncating	37607	3.989e-06
65952	BRCA1	17: 41258504	Exon 4/23	RING	NM_007294.3:c.181T>G	p.(Cys61Gly)	missense	Missense	17661	3.19e-05
66498	BRCA1
4045	BRCA1	17: 41209079-41209080	Exon 19/23	outside domain	NM_007294.3:c.5266dup	p.(Gln1756ProfsTer74)	frameshift duplication	Truncating	17677	0.0001803
66419	BRCA1	17: 41244215	Exon 10/23	outside domain	NM_007294.3:c.3333del	p.(Glu1112AsnfsTer5)	frameshift deletion	Truncating	54847	-
2185	BRCA1
2077	BRCA2	13: 32911298-E14:E29432911301	Exon 11/27	RAD51-BD	NM_000059.3:c.2808_2811del	p.(Ala938ProfsTer21)	frameshift deletion	Truncating	9322	-
65953	BRCA2	13: 32899292	Exon 4/27	outside domain	NM_000059.3:c.396T>A	p.(Cys132Ter)	nonsense	Truncating	37869	-
65960	BRCA2	13: 32929058-32929059	Exon 14/27	outside domain	NM_000059.3:c.7069_7070del	p.(Leu2357ValfsTer2)	frameshift deletion	Truncating	38082	-
15266	BRCA2
10154	BRCA2	13: 32914974-32914977	Exon 11/27	outside domain	NM_000059.3:c.6486_6489del	p.(Lys2162AsnfsTer5)	frameshift deletion	Truncating	38048	-
11759	BRCA2	13: 32914174	Exon 11/27	RAD51-BD	NM_000059.3:c.5682C>G	p.(Tyr1894Ter)	nonsense	Truncating	37989	3.994e-06
9956	BRCA2	13: 32972574	Exon 27/27	outside domain	NM_000059.3:c.9924C>G	p.(Tyr3308Ter)	nonsense	Truncating	52916	7.96e-06
11433	BRCA1	17: 41222952-41222967	Exon 15/23	BRCT	NM_007294.3:c.4964_4979del	p.(Ser1655Ter)	nonsense	Truncating	55334	3.995e-06
65908	BRCA1	17: 41245130	Exon 10/23	DBD	NM_007294.3:c.2418del	p.(Ala807HisfsTer8)	frameshift deletion	Truncating	252379	-
2956	BRCA2	17: 41246291	Exon 10/23	outside domain	NM_007294.3:c.1257del	p.(Asp420MetfsTer10)	frameshift deletion	Truncating	254393	-
6295	BRCA1	17: 41234451	Exon 12/23	outside domain	NM_007294.3:c.4327C>T	p.(Arg1443Ter)	nonsense	Truncating	17675	2.476e-05
4638	BRCA1		Exon 8/23				deletion	SV
1767	BRCA1	17: 41246040	Exon 10/23	DBD	NM_007294.3:c.1508del	p.(Lys503SerfsTer29)	frameshift deletion	Truncating	54275	-
12185	BRCA1	17: 41246334-41246373	Exon 10/23	outside domain	NM_007294.3:c.1175_1214del	p.(Leu392GlnfsTer5)	frameshift deletion	Truncating	17665	-
1654	BRCA1	17: 41245587	Exon 10/23	DBD	NM_007294.3:c.1961del	p.(Lys654SerfsTer47)	frameshift deletion	Truncating	37438	1.063e-05
66200	BRCA2
5693	BRCA1	17: 41258504	Exon 4/23	RING	NM_007294.3:c.181T>G	p.(Cys61Gly)	missense	Missense	17661	3.19e-05
1880	BRCA1	17: 41267746	Exon 3/23	RING	NM_007294.3:c.131G>T	p.(Cys44Phe)	missense	Missense	54200	-
2400	BRCA1	17: 41228602-41228603	Exon 13/23	outside domain	NM_007294.3:c.4386dup	p.(Tyr1463IlefsTer13)	frameshift duplication	Truncating	188414	-
9538	BRCA2	NC_000013.10:g.32968838dup	Exon 25/27	DBD	NM_000059.3:c.9269dup	p.(Val3091Argfs*20)	frameshift duplication	Truncating	52797
2687	BRCA2	13: 32913709-32913715	Exon 11/27	RAD51-BD	NM_000059.3:c.5217_5223del	p.(Tyr1739Ter)	nonsense	Truncating	51822	-
1386	BRCA1	17: 41244986-41244987	Exon 10/23	DBD	NM_007294.3:c.2560_2561dup	p.(Gln855LeufsTer39)	frameshift duplication	Truncating	54600	-
2846	BRCA1	17: 41244712-41244714	Exon 10/23	DBD	NM_007294.3(BRCA1):c.2834_2836delinsC	p.(Ser945fs)	frameshift deletion	Truncating	54694	-
4757	BRCA2	13: 32915250-32915251	Exon 11/27	outside domain	NM_000059.3:c.6761_6762del	p.(Phe2254TyrfsTer6)	frameshift deletion	Truncating	52178	-
3903	BRCA2	13: 32914438	Exon 11/27	RAD51-BD	NM_000059.3:c.5946del	p.(Ser1982ArgfsTer22)	frameshift deletion	Truncating	9325	-
2315	BRCA1	17: 41243576	Exon 10/23	outside domain	NM_007294.3:c.3972del	p.(Met1324IlefsTer12)	frameshift deletion	Truncating	55065	-
2835	BRCA2
11186	BRCA1	17: 41256205-41256206	Exon 6/23	outside domain	NM_007294.3:c.374dup	p.(Gln126ProfsTer16)	frameshift duplication	Truncating	545900	-
2083	BRCA1	17: 41209079-41209080	Exon 19/23	outside domain	NM_007294.3:c.5266dup	p.(Gln1756ProfsTer74)	frameshift duplication	Truncating	17677	0.0001803
1617	BRCA1	17: 41245159	Exon 10/23	DBD	NM_007294.3:c.2389del	p.(Glu797AsnfsTer6)	frameshift deletion	Truncating	54553	-
3691	BRCA2	13: 32914767-32914768	Exon 11/27	outside domain	NM_000059.3:c.6275_6276del	p.(Leu2092ProfsTer7)	frameshift deletion	Truncating	9318	-
5129	BRCA2	13: 32914437	Exon 11/27	RAD51-BD	NM_000059.3:c.5945G>C	p.(Ser1982Thr)	missense	Missense	38010	-
7438	BRCA1	17: 41245210	Exon 10/23	DBD	NM_007294.3:c.2338C>T	p.(Gln780Ter)	nonsense	Truncating	54540	3.988e-06
6708	BRCA1	17: 41276045-41276046	Exon 2/23	RING	NM_007294.3:c.68_69del	p.(Glu23ValfsTer17)	frameshift microsatellite	Truncating	17662	-
4894	BRCA2	13: 32913795-32913796	Exon 11/27	RAD51-BD	NM_000059.3:c.5303_5304del	p.(Leu1768ArgfsTer5)	frameshift deletion	Truncating	37957	-
9374	BRCA1	17: 41244866-41244867	Exon 10/23	DBD	NM_007294.3:c.2681_2682del	p.(Lys894ThrfsTer8)	frameshift deletion	Truncating	17667	-
66644	BRCA2
9850	BRCA2	13: 32912172-32912173	Exon 11/27	RAD51-BD	NM_000059.3:c.3680_3681del	p.(Leu1227GlnfsTer5)	frameshift deletion	Truncating	51504	-
66652	BRCA1	17: 41197784	Exon 23/23	BRCT	NM_007294.3:c.5503C>T	p.(Arg1835Ter)	nonsense	Truncating	55601	1.194e-05
2428	BRCA2
2187	BRCA1	17: 41209079-41209080	Exon 19/23	BRCT	NM_007294.3:c.5266dup	p.(Gln1756ProfsTer74)	frameshift duplication	Truncating	17677	0.0001803
66031	BRCA2	13: 32912965-32912968	Exon 11/27	RAD51-BD	NM_000059.3:c.4478_4481del	p.(Glu1493ValfsTer10)	frameshift deletion	Truncating	51653
5619	BRCA2		Exon 14-16/27				deletion	SV
8424	BRCA1	17: 41243787-41243788	Exon 10/23	outside domain	NM_007294.3:c.3760_3761insT	p.(Lys1254IlefsTer13)	frameshift duplication	Truncating	54995	-
8836	BRCA2		Exon 14-16/27				deletion	SV
11731	BRCA2	13: 32907428	Exon 10/27	outside domain	NM_000059.3:c.1813dup	p.(Ile605AsnfsTer11)	frameshift duplication	Truncating	37762	-
8690	BRCA1	17: 41242963	Exon 11/23	outside domain	NM_007294.3:c.4183C>T	p.(Gln1395Ter)	nonsense	Truncating	55125	4.118e-06
66350	BRCA2
8473	BRCA1	17: 41244319-41244320	Exon 10/23	DBD	NM_007294.3:c.3228_3229del	p.(Gly1077AlafsTer8)	frameshift deletion	Truncating	37516	-
66035	BRCA2	13: 32913381	Exon 11/27	RAD51-BD	NM_000059.3:c.4889C>G	p.(Ser1630Ter)	nonsense	Truncating	51732	8.032e-06
5690	BRCA1	17: 41276045-41276046	Exon 2/23	RING	NM_007294.3:c.68_69del	p.(Glu23ValfsTer17)	frameshift microsatellite	Truncating	17662	-
4853	BRCA1	17: 41209079-41209080	Exon 19/23	outside domain	NM_007294.3:c.5266dup	p.(Gln1756ProfsTer74)	frameshift duplication	Truncating	17677	0.0001803
10205	BRCA1	17: 41245466_41245480	Exon 10/23	DBD	NM_007294.3:c.2068_2082del	p.(Lys690_Ser694del)	frameshift deletion	Truncating	-	-
65955	BRCA2
7181	BRCA2	13: 32913067-32913068	Exon 11/27	RAD51-BD	NM_000059.3:c.4576dup	p.(Thr1526AsnfsTer3)	frameshift duplication	Truncating	266821	-
3268	BRCA2	13: 32937582	exon 18/27	DBD	NM_000059.3:c.8243G>A	p.(Gly2748Asp)	missense	Missense	52535	8.03e-06
8456	BRCA1	17: 41256280	Intron 5/22	BRCT	NM_007294.3:c.302-2del	p.?	splice acceptor	Splice	54753	-
66743	BRCA2	13: 32912902-32912905	Exon 11/27	RAD51-BD	NM_000059.3:c.4415_4418del	p.(Lys1472ThrfsTer6)	frameshift deletion	Truncating	37902	-
66736	BRCA2
4406	BRCA2	13: 32914438	Exon 11/27	RAD51-BD	NM_000059.3:c.5946del	p.(Ser1982ArgfsTer22)	frameshift deletion	Truncating	9325	-
6486	BRCA2	13: 32910901	Exon 11/27	outside domain	NM_000059.3:c.2409T>G	p.(Tyr803Ter)	nonsense	Truncating	37784	-
12048	BRCA2	13: 32905124-32905127	Exon 9/27	outside domain	NM_000059.3:c.755_758del	p.(Asp252ValfsTer24)	frameshift deletion	Truncating	38103	-
66334	BRCA2	13: 32905124-32905127	Exon 9/27	outside domain	NM_000059.3:c.755_758del	p.(Asp252ValfsTer24)	frameshift deletion	Truncating	38103	-
15290	BRCA1		Exon 20/23				deletion	SV
5403	BRCA1	17: 41243876-41243877	Exon 10/23	outside domain	NM_007294.3:c.3668_3671dup	p.(Cys1225SerfsTer10)	frameshift duplication	Truncating	54960	-
3158	BRCA1
66187	BRCA1
15333	BRCA2	13: 32945165	Exon 20/27	DBD	NM_000059.3:c.8560del	p.(Tyr2854MetfsTer9)	frameshift deletion	Truncating	52620	-
8928	BRCA1	17: 41245529	Exon 10/23	DBD	NM_007294.3:c.2019del	p.(Glu673AspfsTer28)	frameshift deletion	Truncating	54438	-
9077	BRCA2	13: 32906839	Exon 10/27	outside domain	NM_000059.3:c.1225del	p.(Glu409ArgfsTer21)	frameshift deletion	Truncating	51087	-
15253	BRCA1	17: 41276045-41276046	Exon 2/23	RING	NM_007294.3:c.68_69del	p.(Glu23ValfsTer17)	frameshift microsatellite	Truncating	17662	-
65588	BRCA1	17: 41246652-41246653	Exon 10/23	outside domain	NM_007294.3:c.895_896del	p.(Val299ArgfsTer4)	frameshift deletion	Truncating	55744	3.979e-06
3644	BRCA1	17: 41244627	Exon 10/23	DBD	NM_007294.3:c.2921T>A	p.(Leu974Ter)	nonsense	Truncating	54719	-
15216	BRCA1	17: 41209079-41209080	Exon 19/23	outside domain	NM_007294.3:c.5266dup	p.(Gln1756ProfsTer74)	frameshift duplication	Truncating	17677	0.0001803
15257	BRCA1	17: 41276045-41276046	Exon 2/23	RING	NM_007294.3:c.68_69del	p.(Glu23ValfsTer17)	frameshift deletion	Truncating	17662	-
66172	BRCA2
7202	BRCA2	13: 32912338-32912339	Exon 11/27	RAD51-BD	NM_000059.3:c.3847_3848del	p.(Val1283LysfsTer2)	frameshift deletion	Truncating	37859	-
65642	BRCA2	13: 32953602	Exon 22/27	DBD	NM_000059.3:c.8904del	p.(Val2969CysfsTer7)	frameshift deletion	Truncating	38192	-
65618	BRCA2	13: 32893297	Exon 3/27	outside domain	NM_000059.3:c.151G>T	p.(Glu51Ter)	missense	Missense	-	-
65543	BRCA1	17: 41215954	Exon 17/23	BRCT	NM_007294.3:c.5089T>C	p.(Cys1697Arg)	missense	Missense	55392	-
2736	BRCA1	17: 41243789-41243792	Exon 10/23	outside domain	NM_007294.3:c.3756_3759del	p.(Ser1253ArgfsTer10)	frameshift deletion	Truncating	17673	-
543	BRCA1	17: 41258504	Exon 4/23	RING	NM_007294.3:c.181T>G	p.(Cys61Gly)	missense	Missense	17661	3.19e-05
8471	BRCA1	17: 41244866-41244869	Exon 10/23	DBD	NM_007294.3:c.2679_2682del	p.(Lys893AsnfsTer106)	frameshift deletion	Truncating	37481	-
66180	BRCA1
958	BRCA2	NC_000013.10:g.32910949del	Exon 11/27	outside domain	NM_000059.3:c.2457del	p.(Asp820Metfs*5)	frameshift deletion	Truncating
66130	BRCA1
5589	BRCA1	17: 41244057-41244067	Exon 10/23	outside domain	NM_007294.3:c.3481_3491del	p.(Glu1161PhefsTer3)	frameshift deletion	Truncating	17684	-
66739	BRCA2		Exon 14-16				deletion	SV
66022	BRCA2	13: 32914438	Exon 11/27	RAD51-BD	NM_000059.3:c.5946del	p.(Ser1982ArgfsTer22)	frameshift deletion	Truncating	9325	-
1500	BRCA1	17: 41222949-41222967	Exon 15/23	BRCT	NM_007294.3:c.4964_4982del	p.(Ser1655TyrfsTer16)	frameshift deletion	Truncating	37616	-
4850	BRCA1	17: 41243876-41243877	Exon 10/23	outside domain	NM_007294.3:c.3668_3671dup	p.(Cys1225SerfsTer10)	frameshift duplication	Truncating	54960	-
66062	BRCA2	13: 32907447	Exon 10/27	outside domain	NM_000059.3:c.1832C>G	p.(Ser611Ter)	nonsense	Truncating	228323	-
15296	BRCA1	17: 41246509	Exon 10/23	outside domain	NM_007294.3:c.1039del	p.(Leu347CysfsTer27)	frameshift deletion	Truncating	254387	-
66114	BRCA1	17: 41209134	Exon 19/23	outside domain	NM_007294.3:c.5212G>A	p.(Gly1738Arg)	missense	Missense	55461	-
6213	BRCA1	17: 41245333	Exon 10/23	DBD	NM_007294.3:c.2215A>T	p.(Lys739Ter)	nonsense	Truncating	54503	7.97e-06
66331	BRCA1
5815	BRCA2	13: 32907428	Exon 10/27	outside domain	NM_000059.3:c.1813dup	p.(Ile605AsnfsTer11)	frameshift duplication	Truncating	37762	-
66557	BRCA2
8075	BRCA1	17: 41223063	Exon 15/23	outside domain	NM_007294.3:c.4868C>G	p.(Ala1623Gly)	missense	Missense	37614	-
66543	BRCA1	17: 41244214-41244217	Exon 10/23	outside domain	NM_007294.3:c.3331_3334del	p.(Gln1111AsnfsTer5)	frameshift deletion	Truncating	37523	3.996e-06
66585	BRCA1
65914	BRCA2	13: 32914210-32914211	Exon 11/27	RAD51-BD	NM_000059.3:c.5722_5723del	p.(Leu1908ArgfsTer2)	frameshift deletion	Truncating	9320	-
66298	BRCA2
6406	BRCA2	13: 32915134	Exon 11/27	outside domain	NM_000059.3:c.6643del	p.(Tyr2215ThrfsTer14)	frameshift deletion	Truncating	52145	-
65879	BRCA1	17: 41242960	Intron 11/22	DBD	NM_007294.3:c.4185+1G>T	p.?	nonsense	Truncating	-	-
4112	BRCA1	17: 41244832	Exon 10/23	DBD	NM_007294.4:c.2716A>C	p.(Lys906Gln)	missense	Missense	628997	-
11757	BRCA1	17: 41243789-41243792	Exon 10/23	outside domain	NM_007294.3:c.3756_3759del	p.(Ser1253ArgfsTer10)	frameshift deletion	Truncating	17673	-
6867	BRCA2	13: 32914068-32914071	Exon 11/27	RAD51-BD	NM_000059.3:c.5576_5579del	p.(Ile1859LysfsTer3)	frameshift deletion	Truncating	37975	-
66733	BRCA1	17: 41245587	Exon 10/23	DBD	NM_007294.3:c.1961del	p.(Lys654SerfsTer47)	frameshift deletion	Truncating	37438	-
15240	BRCA1	17: 41245385-41245386	Exon 10/23	DBD	NM_007294.3:c.2162_2163del	p.(Phe721CysfsTer4)	frameshift deletion	Truncating	462575	-
9962	BRCA1		Exon 13/23				duplication	SV
8339	BRCA1	17: 41244854	Exon 10/23	DBD	NM_007294.3:c.2694del	p.(Val899SerfsTer101)	frameshift deletion	Truncating	266294	-
66240	BRCA1
11393	BRCA1	NC_000017.10:g.41256917del	Exon 5/23	RING	NM_007294.4:c.271del	p.(Cys91Valfs*28)	frameshift deletion	Truncating
8340	BRCA1	17: 41244217	Exon 10/23	outside domain	NM_007294.3:c.3331del	p.(Gln1111LysfsTer6)	frameshift deletion	Truncating	266356	0.0003956
66288	BRCA2
15295	BRCA2	NC_000013.10:g.32906928dup	Exon 10/27	outside domain	NM_000059.3:c.1313dup	p.(Asp438Glufs*14)	frameshift duplication	Truncating
66148	BRCA1
66584	BRCA1
65892	BRCA1	17: 41243941	Exon 10/23	outside domain	NM_007294.3:c.3607C>T	p.(Arg1203Ter)	nonsense	Truncating	17671	1.195e-05
66434	BRCA1
2988	BRCA1	17: 41256153	Exon 6/23	outside domain	NM_007294.3:c.427G>T	p.(Glu143Ter)	nonsense	Truncating	37581	-
5855	BRCA2	13: 32915167	Exon 11/27	outside domain	NM_000059.3:c.6675del	p.(Glu2226LysfsTer3)	frameshift deletion	Truncating	-	-
11159	BRCA2	NC_000013.10:g.32911252del	Exon 11/27	RAD51-BD	NM_000059.3:c.2760del	p.(Ile921Phefs*39)	frameshift deletion	Truncating	51337
66428	BRCA1
15342	BRCA1	17: 41246446	Exon 10/23	outside domain	NM_007294.3:c.1102G>T	p.(Glu368Ter)	nonsense	Truncating	54128	-
12254	BRCA1	17: 41276045-41276046	Exon 2/23	RING	NM_007294.3:c.68_69del	p.(Glu23ValfsTer17)	frameshift deletion	Truncating	17662	-
66173	BRCA2
11502	BRCA2	13: 32912887-32912891	Exon 11/27	RAD51-BD	NM_000059.3:c.4398_4402del	p.(Leu1466PhefsTer2)	frameshift deletion	Truncating	51640	-
65659	BRCA1	17: 41244148	Exon 10/23	outside domain	NM_007294.3:c.3400G>T	p.(Glu1134Ter)	nonsense	Truncating	37529	3.987e-06
10519	BRCA1	17:41223242	Exon 15/23	outside domain	NM_007294.3:c.4689C>G	(p.Tyr1563Ter)	nonsense	Truncating	37607	3.989e-06
15292	BRCA2	13: 32912703	Exon 11/27	RAD51-BD	NM_000059.3:c.4211C>G	p.(Ser1404Ter)	nonsense	Truncating	266795	-
65862	BRCA1	17: 41201198	Exon 21/23	BRCT	NM_007294.3:c.5346G>A	p.(Trp1782Ter)	nonsense	Truncating	37658	-
1796	BRCA1		Exon 13/23				duplication	SV
11191	BRCA1	17: 41246440-41246441	Exon 10/23	outside domain	NM_007294.3:c.1107_1108insCT	p.(Val370LeufsTer5)	frameshift duplication	Truncating	548288	-
65594	BRCA1	17: 41276045-41276046	Exon 2/23	RING	NM_007294.3:c.68_69del	p.(Glu23ValfsTer17)	frameshift deletion	Truncating	17662	-
2487	BRCA2	13: 32903605-32903606	Exon 8/27	outside domain	NM_000059.3:c.658_659del	p.(Val220IlefsTer4)	frameshift deletion	Truncating	9342	-
4755	BRCA1	17: 41209079-41209080	Exon 19/23	outside domain	NM_007294.3:c.5266dup	p.(Gln1756ProfsTer74)	frameshift duplication	Truncating	17677	0.0001803
4631	BRCA1		Exon 20/23				deletion	SV
15229	BRCA1	17: 41276045-41276046	Exon 2/23	RING	NM_007294.3:c.68_69del	p.(Glu23ValfsTer17)	frameshift deletion	Truncating	17662	-
9930	BRCA1	17: 41244866-41244867	Exon 10/23	DBD	NM_007294.3:c.2681_2682del	p.(Lys894ThrfsTer8)	frameshift deletion	Truncating	17667	-
1284	BRCA2	13: 32905124-32905127	Exon 9/27	outside domain	NM_000059.3:c.755_758del	p.(Asp252ValfsTer24)	frameshift deletion	Truncating	38103	-
7953	BRCA1	17: 41215948	Exon 17/23	BRCT	NM_007294.3:c.5095C>T	p.(Arg1699Trp)	missense	Missense	55396	-
8203	BRCA1		Exon 5/23				deletion	SV
66651	BRCA2	13: 32911436	Exon 11/27	RAD51-BD	NM_000059.3:c.2944A>C	p.(Ile982Leu)	missense	Missense	51375	4.016e-05
66438	BRCA1	17: 41243789-41243792	Exon 10/23	outside domain	NM_007294.3:c.3756_3759del	p.(Ser1253ArgfsTer10)	frameshift deletion	Truncating	17673	2.388e-05
66395	BRCA1
4947	BRCA1	17: 41243480-41243483	Exon 10/23	outside domain	NM_007294.3:c.4065_4068del	p.(Asn1355LysfsTer10)	frameshift deletion	Truncating	17674	3.987e-06
66205	BRCA2	13: 32913837-32913838	Exon 11/27	RAD51-BD	NM_000059.3:c.5350_5351del	p.(Asn1784HisfsTer2)	frameshift deletion	Truncating	37959	-
66362	BRCA2	13: 32912172-32912173	Exon 11/27	RAD51-BD	NM_000059.3:c.3680_3681del	p.(Leu1227GlnfsTer5)	frameshift deletion	Truncating	51504	-
1251	BRCA2	13: 32913837-32913838	Exon 11/27	RAD51-BD	NM_000059.3:c.5350_5351del	p.(Asn1784HisfsTer2)	frameshift deletion	Truncating	37959	-
66406	BRCA1
5874	BRCA1	17: 41243789-41243792	Exon 10/23	outside domain	NM_007294.3:c.3756_3759del	p.(Ser1253ArgfsTer10)	frameshift microsatellite	Truncating	17673	-
8479	BRCA1	17: 41243481_41243483	Exon 10/23	outside domain	NM_007294.3:c.4065_4067del	p.(Asn1355_Gln1356delinsLys)	frameshift deletion	Truncating	-	-
15316	BRCA1	17: 41243025-41243026	Exon 11/23	outside domain	NM_007294.3:c.4120_4121del	p.(Ser1374Ter)	frameshift deletion	Truncating	37570	-
11831	BRCA2	13: 32914767-32914768	Exon 11/27	outside domain	NM_000059.3:c.6275_6276del	p.(Leu2092ProfsTer7)	frameshift deletion	Truncating	9318	-
9998	BRCA1	17: 41246334-41246373	Exon 10/23	outside domain	NM_007294.3:c.1175_1214del	p.(Leu392GlnfsTer5)	frameshift deletion	Truncating	17665	-
7620	BRCA1	17: 41209079-41209080	Exon 19/23	outside domain	NM_007294.3:c.5266dup	p.(Gln1756ProfsTer74)	frameshift duplication	Truncating	17677	0.0001803
7064	BRCA1	17: 41256984	Intron 4/22	RING	NM_007294.3:c.213-11T>G	p.?	nonsense	Truncating	37449	1.196e-05
9248	BRCA2	13: 32914174	Exon 11/27	RAD51-BD	NM_000059.3:c.5682C>G	p.(Tyr1894Ter)	nonsense	Truncating	37989	-
66377	BRCA1	17: 41244986-41244987	Exon 10/23	DBD	NM_007294.3:c.2560_2561dup	p.(Gln855LeufsTer39)	frameshift duplication	Truncating	54600	-
4251	BRCA1
66462	BRCA1	17: 41244866-41244867	Exon 10/23	DBD	NM_007294.3:c.2681_2682del	p.(Lys894ThrfsTer8)	frameshift deletion	Truncating	17667	3.985e-06
3613	BRCA1	17: 41219624	Intron 16/22	BRCT	NM_007294.3:c.5074+1G>T	p.?	splice donor	Splice	37630	3.978e-06
9357	BRCA2	13: 32890623	Exon 2/27	outside domain	NM_000059.3:c.26del	p.(Pro9GlnfsTer16)	frameshift deletion	Truncating	51330	-
5850	BRCA1	17: 41267775	Exon 3/23	RING	NM_007294.3:c.102del	p.(Val35SerfsTer15)	frameshift deletion	Truncating	266132	-
3847	BRCA2	13: 32910821-32910822	Exon 11/27	outside domain	NM_000059.3:c.2330dup	p.(Asp777GlufsTer11)	frameshift duplication	Truncating	91775	3.985e-06
8461	BRCA2	13: 32914202	Exon 11/27	RAD51-BD	NM_000059.3:c.5710C>T	p.(Leu1904Phe)	missense	Missense	126074	-
66120	BRCA1		Exon 11/23
6399	BRCA1	17: 41276046	Exon 2/23	RING	NM_007294.3:c.68del	p.(Glu23GlyfsTer8)	frameshift deletion	Truncating	266568	0.0002054
11895	BRCA2	13: 32937354-32937355	exon 18/27	DBD	NM_000059.3:c.8021dup	p.(Ile2675AspfsTer6)	frameshift duplication	Truncating	267050	-
6490	BRCA1	17: 41267797	Intron 2/22	RING	NM_007294.3:c.81-1G>A	p.?	splice acceptor	Splice	91668	3.997e-06
5021	BRCA1	17: 41245587	Exon 10/23	DBD	NM_007294.3:c.1961del	p.(Lys654SerfsTer47)	frameshift deletion	Truncating	37438	1.063e-05
15209	BRCA1	17: 41209079-41209080	Exon 19/23	outside domain	NM_007294.3:c.5266dup	p.(Gln1756ProfsTer74)	frameshift duplication	Truncating	17677	0.0001803
66264	BRCA1	17: 41245331-41245332	Exon 10/23	DBD	NM_007294.3:c.2216_2217del	p.(Lys739SerfsTer3)	frameshift deletion	Truncating	54504	3.984e-06
1563	BRCA1	17: 41245043-41245044	Exon 10/23	DBD	NM_007294.3:c.2504dup	p.(His835GlnfsTer2)	frameshift duplication	Truncating	431228	-
66786	BRCA1	17: 41243789-41243792	Exon 10/23	outside domain	NM_007294.3:c.3756_3759del	p.(Ser1253ArgfsTer10)	frameshift deletion	Truncating	17673	2.388e-05
66711	BRCA1	17: 41276045-41276046	Exon 2/23	RING	NM_007294.3:c.68_69del	p.(Glu23ValfsTer17)	frameshift deletion	Truncating	17662	-
66412	BRCA1	17: 41244986-41244987	Exon 10/23	DBD	NM_007294.3:c.2560_2561dup	p.(Gln855LeufsTer39)	frameshift duplication	Truncating	54600	-
66523	BRCA2	13: 32910584	Exon 11/27	outside domain	NM_000059.3:c.2092del	p.(Leu698TyrfsTer32)	frameshift deletion	Truncating	37774	-
66561	BRCA1	17: 41243480-41243483	Exon 10/23	outside domain	NM_007294.3:c.4065_4068del	p.(Asn1355LysfsTer10)	frameshift deletion	Truncating	17674	3.987e-06
3281	BRCA2	13: 32890623	Exon 2/27	outside domain	NM_000059.3:c.26del	p.(Pro9GlnfsTer16)	frameshift deletion	Truncating	51330	-
66853	BRCA1	17: 41267743-41267796	Exon 3/23	RING	NM_007294.3:c.81_134del	p.(Cys27Ter)	nonsense	Truncating	224416	-
4194	BRCA1	17: 41243479-41243482	Exon 10/23	outside domain	NM_007294.3:c.4066_4069del	p.(Gln1356LysfsTer9)	frameshift deletion	Truncating	55094	1.196e-05
66525	BRCA2	13: 32914438	Exon 11/27	RAD51-BD	NM_000059.3:c.5946del	p.(Ser1982ArgfsTer22)	frameshift deletion	Truncating	9325	-
66236	BRCA1
66636	BRCA2	13: 32972403	Exon 27/27	outside domain	NM_000059.3:c.9753del	p.(Lys3251AsnfsTer24)	frameshift deletion	Truncating	224449	-
3231	BRCA2	13: 32968854	Exon 25/27	DBD	NM_000059.3:c.9285C>A	p.(Asp3095Glu)	missense	Missense	252859	3.989e-06
639	BRCA1	17: 41243513	Exon 10/23	outside domain	NM_007294.3:c.4035del	p.(Glu1346LysfsTer20)	frameshift deletion	Truncating	37560	-
7471	BRCA2	13: 32913118-32913119	Exon 11/27	RAD51-BD	NM_000059.3:c.4631dup	p.(Asn1544LysfsTer4)	frameshift duplication	Truncating	37912	7.104e-06
15224	BRCA1	17: 41222949-41222967	Exon 15/23	BRCT	NM_007294.3:c.4964_4982del	p.(Ser1655TyrfsTer16)	frameshift deletion	Truncating	37616	-
10000	BRCA2	13: 32911250	Exon 11/27	RAD51-BD	NM_000059.3:c.2760del	p.(Ile921PhefsTer39)	frameshift deletion	Truncating	51337	-
10922	BRCA1	17: 41209079-41209080	Exon 19/23	outside domain	NM_007294.3:c.5266dup	p.(Gln1756ProfsTer74)	frameshift duplication	Truncating	17677	0.0001803
3812	BRCA2	13: 32912965-32912968	Exon 11/27	RAD51-BD	NM_000059.3:c.4478_4481del	p.(Glu1493ValfsTer10)	frameshift deletion	Truncating	51653	-
65938	BRCA1	17: 41197784	Exon 23/23	BRCT	NM_007294.3:c.5503C>T	p.(Arg1835Ter)	nonsense	Truncating	55601	1.194e-05
66376	BRCA2	13: 32914174	Exon 11/27	RAD51-BD	NM_000059.3:c.5682C>G	p.(Tyr1894Ter)	nonsense	Truncating	37989	3.994e-06
15397	BRCA2	13: 32913565	Exon 11/27	RAD51-BD	NM_000059.3:c.5073dup	p.(Trp1692MetfsTer3)	frameshift duplication	Truncating	37943	-
66501	BRCA1	17: 41245594-41245595	Exon 10/23	DBD	NM_007294.3:c.1953dup	p.(Lys652GlufsTer21)	frameshift duplication	Truncating	54412	-
7182	BRCA2	13: 32914767-32914768	Exon 11/27	outside domain	NM_000059.3:c.6275_6276del	p.(Leu2092ProfsTer7)	frameshift deletion	Truncating	9318	-
66308	BRCA2	13: 32969046	Exon 25/27	DBD	NM_000059.3:c.9477C>A	p.(Phe3159Leu)	missense	Missense	52847	3.981e-06
11450	BRCA2	13: 32929058-32929059	Exon 14/27	outside domain	NM_000059.3:c.7069_7070del	p.(Leu2357ValfsTer2)	frameshift deletion	Truncating	38082	-
10147	BRCA2	13: 32972348	Exon 27/27	outside domain	NM_000059.3:c.9698G>A	p.(Cys3233Tyr)	missense	Missense	91532	7.987e-06
8573	BRCA2	13: 32968951	Exon 25/27	DBD	NM_000059.3:c.9382C>T	p.(Arg3128Ter)	nonsense	Truncating	52826	2.122e-05
15308	BRCA1	17: 41258504	Exon 4/23	RING	NM_007294.3:c.181T>G	p.(Cys61Gly)	missense	Missense	17661	3.19e-05
8515	BRCA1	17: 41245587	Exon 10/23	DBD	NM_007294.3:c.1961del	p.(Lys654SerfsTer47)	frameshift deletion	Truncating	37438	1.063e-05
1658	BRCA2
4066	BRCA1	17: 41197784	Exon 23/23	BRCT	NM_007294.3:c.5503C>T	p.(Arg1835Ter)	nonsense	Truncating	55601	1.194e-05
65629	BRCA2	13: 32905141-32905145	Exon 9/27	outside domain	NM_000059.3:c.771_775del	p.(Asn257LysfsTer17)	frameshift deletion	Truncating	9326	-
66749	BRCA2	13: 32914130-32914133	Exon 11/27	RAD51-BD	NM_000059.3:c.5641_5644del	p.(Lys1881GlnfsTer27)	frameshift deletion	Truncating	51897	-
66536	BRCA2	13: 32910982-32910983	Exon 11/27	outside domain	NM_000059.3:c.2490_2491insT	p.(Val831CysfsTer2)	frameshift duplication	Truncating	266703	-
11839	BRCA2	13: 32912603	Exon 11/27	RAD51-BD	NM_000059.3:c.4111C>T	p.(Gln1371Ter)	nonsense	Truncating	51599	-
15317	BRCA1	17: 41256153	Exon 6/23	outside domain	NM_007294.3:c.427G>T	p.(Glu143Ter)	nonsense	Truncating	37581	-
11231	BRCA1		Exon 20/23				deletion	SV
65610	BRCA1	17: 41243506-41243507	Exon 10/23	outside domain	NM_007294.3:c.4041_4042del	p.(Gly1348AsnfsTer7)	frameshift deletion	Truncating	55082	-
66299	BRCA2	13: 32914894-32914898	Exon 11/27	outside domain	NM_000059.3:c.6405_6409del	p.(Asn2135LysfsTer3)	frameshift deletion	Truncating	38043	-
5643	BRCA2	13: 32953914-32953915	Exon 23/27	DBD	NM_000059.3:c.8982_8985dup	p.(Leu2996ArgfsTer23)	frameshift duplication	Truncating	548368	-
2595	BRCA1	17: 41245587	Exon 10/23	DBD	NM_007294.3:c.1961del	p.(Lys654SerfsTer47)	frameshift deletion	Truncating	37438	1.063e-05
1345	BRCA1	17: 41246879	Intron 9/22	DBD	NM_007294.3:c.671-2A>G	p.?	splice acceptor	Splice	267617	4.224e-06
10106	BRCA2	13: 32907232	Exon 10/27	outside domain	NM_000059.3:c.1617del	p.(Leu540TrpfsTer18)	frameshift deletion	Truncating	51156	-
66842	BRCA1	17: 41267743-41267796	Exon 3/23	RING	NM_007294.3:c.81_134del	p.(Cys27Ter)	nonsense	Truncating	224416	-
66137	BRCA1	17: 43094279	Exon 10/23	outside domain	NM_007294.3:c.1252G>T	p.(Glu418Ter)	nonsense	Truncating	54176	-
66659	BRCA1	17: 41215899	Exon 17/23	BRCT	NM_007294.3:c.5144G>A	p.(Ser1715Asn)	missense	Missense	55416	-
4065	BRCA1	17: 41243920-41243921	Exon 10/23	outside domain	NM_007294.3:c.3627dup	p.(Glu1210ArgfsTer9)	frameshift duplication	Truncating	37534	7.96e-06
9540	BRCA2	13: 32932018	Exon 16/27	DBD	NM_000059.3:c.7757G>A	p.(Trp2586Ter)	nonsense	Truncating	52401	7.954e-06
66396	BRCA1
66503	BRCA1
66582	BRCA1	17: 4122324	Intron 3/24	outside domain	NM_007294.3:c.4689C>G	p.(Tyr1563Ter)	nonsense	Truncating	37607	-
66617	BRCA2	13: 32911786	Exon 11/27	RAD51-BD	NM_000059.3:c.3295del	p.(Ser1099GlnfsTer5)	frameshift deletion	Truncating	254516	-
66505	BRCA2	13: 32945189-32945190	Exon 20/27	DBD	NM_000059.3:c.8585dup	p.(Glu2863ArgfsTer6)	frameshift duplication	Truncating	38170	-
66775	BRCA1	17: 41258504	Exon 4/23	RING	NM_007294.3:c.181T>G	p.(Cys61Gly)	missense	Missense	17661	3.19e-05
66675	BRCA1	17: 41215948	Exon 17/23	BRCT	NM_007294.3:c.5095C>T	p.(Arg1699Trp)	missense	Missense	55396	-
66666	BRCA1	17: 41245194	Exon 10/23	DBD	NM_007294.3:c.2354T>A	p.(Leu785Ter)	nonsense	Truncating	54545	-
66805	BRCA1
6548	BRCA1	17: 41276034_41276044	Exon 2/23	RING	NM_007294.3:c.70_80del	p.(Cys24SerfsTer13)	frameshift deletion	Truncating		-
66816	BRCA2	13: 32913565	Exon 11/27	RAD51-BD	NM_000059.3:c.5073dup	p.(Trp1692MetfsTer3)	frameshift duplication	Truncating	37943	-
66727	BRCA1	17: 41245936	Exon 10/23	DBD	NM_007294.3:c.1612C>T	p.(Gln538Ter)	nonsense	Truncating	54309	-
15276	BRCA1	17 41262912_41272498	Exon 3/23		NM_007294.3:c.80+3536_135-4362del	p.?	deletion	SV	-	-
4764	BRCA1	17: 41245279	Exon 10/23	DBD	NM_007294.3:c.2269del	p.(Ser758ValfsTer14)	frameshift deletion	Truncating	37459	-
66327	BRCA1
4505	BRCA1	17: 41243480-41243483	Exon 10/23	outside domain	NM_007294.3:c.4065_4068del	p.(Asn1355LysfsTer10)	frameshift deletion	Truncating	17674	3.987e-06
15284	BRCA1	17: 41215348	intron 18/22	BRCT	NM_007294.3:c.5193+2del	p.?	splice donor	Splice	55450	-
6269	BRCA2	13: 32903605-32903606	Exon 8/27	outside domain	NM_000059.3:c.658_659del	p.(Val220IlefsTer4)	frameshift deletion	Truncating	9342	-
15321	BRCA1	17: 41245586-41245587	Exon 10/23	DBD	NM_007294.3:c.1961dup	p.(Tyr655ValfsTer18)	frameshift duplication	Truncating	54417	1.197e-05
11995	BRCA1	17: 41256201	Exon 6/23	outside domain	NM_007294.3:c.379del	p.(Ser127ValfsTer36)	frameshift deletion	Truncating	496371	?
66335	BRCA1		Exon 20-21/23				deletion	SV
3142	BRCA2	13: 32914438	Exon 11/27	RAD51-BD	NM_000059.3:c.5946del	p.(Ser1982ArgfsTer22)	frameshift deletion	Truncating	9325	-
66740	BRCA2	13: 32914438	Exon 11/27	RAD51-BD	NM_000059.3:c.5946del	p.(Ser1982ArgfsTer22)	frameshift deletion	Truncating	9325	-
66237	BRCA2
2039	BRCA1	17: 41228505	Exon 13/23	outside domain	NM_007294.3:c.4484G>A	p.(Arg1495Lys)	missense	Missense	37597	3.981e-06
3202	BRCA2	13: 32911628	Exon 11/27	RAD51-BD	NM_000059.3:c.3136G>T	p.(Glu1046Ter)	missense	Missense	-	-
5868	BRCA1	17: 41256884	Intron 5/22	RING	NM_007294.3:c.301+1G>A	p.?	splice donor	Splice	142004	3.981e-06
65555	BRCA1	17: 41223063	Exon 15/23	outside domain	NM_007294.3:c.4868C>G	p.(Ala1623Gly)	missense	Missense	37614	3.978e-06
66591	BRCA1	17: 41209069_41209152	Exon 19/23	BRCT	NM_007294.3:c.5194_5277del	p.(His1732_Lys1759del)	frameshift deletion	Truncating	-	-
11489	BRCA1	17: 41246038	Exon 10/23	DBD	NM_007294.3:c.1510del	p.(Arg504ValfsTer28)	frameshift deletion	Truncating	37418	3.983e-06
66514	BRCA1
66632	BRCA1	17: 41215948	Exon 17/23	BRCT	NM_007294.3:c.5095C>T	p.(Arg1699Trp)	missense	Missense	55396	-
15245	BRCA1	17: 41276045-41276046	Exon 2/23	RING	NM_007294.3:c.68_69del	p.(Glu23ValfsTer17)	frameshift deletion	Truncating	17662	-
11094	BRCA1	17: 41244585	Exon 10/23	DBD	NM_007294.3:c.2963C>A	p.(Ser988Ter)	nonsense	Truncating	54732	-
5007	BRCA1	17: 41245861	Exon 10/23	DBD	NM_007294.3:c.1687C>T	p.(Gln563Ter)	nonsense	Truncating	37426	2.795e-05
66655	BRCA1
66761	BRCA1	17: 41258504	Exon 4/23	RING	NM_007294.3:c.181T>G	p.(Cys61Gly)	missense	Missense	17661	3.19e-05
66708	BRCA2	13: 32913778-32913779	Exon 11/27	RAD51-BD	NM_000059.3:c.5290_5291del	p.(Ser1764LysfsTer3)	frameshift deletion	Truncating	37956	-
66807	BRCA2
66763	BRCA1	17: 41276034-41276044	Exon 2/23	RING	NM_007294.3:c.70_80del	p.(Cys24SerfsTer13)	frameshift deletion	Truncating	55676	-
1801	BRCA2	13: 32953602	Exon 22/27	DBD	NM_000059.3:c.8904del	p.(Val2969CysfsTer7)	frameshift deletion	Truncating	38192	-
8683	BRCA1		deletion 1-23/23				deletion	SV
66511	BRCA2	13: 32937402	Exon 18/27	DBD	NM_000059.3:c.8063T>C	p.(Leu2688Pro)	missense	Missense	38137	-
66819	BRCA1
66766	BRCA1
11551	BRCA1	17: 41243480-41243483	Exon 10/23	outside domain	NM_007294.3:c.4065_4068del	p.(Asn1355LysfsTer10)	frameshift deletion	Truncating	17674	3.987e-06
66654	BRCA1	17: 41245587	Exon 10/23	DBD	NM_007294.3:c.1961del	p.(Lys654SerfsTer47)	frameshift deletion	Truncating	37438	-
66175	BRCA1	17: 41246531-41246532	Exon 10/23	outside domain	NM_007294.3:c.1016dup	p.(Val340GlyfsTer6)	frameshift duplication	Truncating	54102	-
66018	BRCA2
65890	BRCA1	17: 41276045-41276046	Exon 2/23	RING	NM_007294.3:c.68_69del	p.(Glu23ValfsTer17)	frameshift deletion	Truncating	17662	-
66830	BRCA1	17: 41244391	Exon 10/23	DBD	NM_007294.3:c.3157G>T	p.(Glu1053Ter)	nonsense	Truncating	187251	-
DBD=DNA Binding Domain, RING=Really Interesting New Gene, RAD51-BD=RAD51 Binding Domain, BRCT=BRCA1 C-Terminal, SV=Structural Variant

## Sheet: Supplementary Table S3
Supplementary Table S3: Associations of clinical features with overall survival using univariable and multivariable Accelerated Failure Time (AFT) models.
			Univariable					Multivariable
				95%CI					95%CI
Feature	Factor	Number	TR	lower	upper	P-value *	P-value**	TR	lower	upper	P-value*	P-value**
BRCA-status	Non-carriers	1096	-	-	-	-	-	-	-	-	-	-
	gBRCApv-carriers	281	1.72	1.5	1.98	<0.001	-	1.53	1.33	1.76	<0.001	-
Residual disease	R0	461	-	-	-	-	-	-	-	-	-	-
	R	823	0.46	0.41	0.52	<0.001	0.008	0.55	0.48	0.62	<0.001	0.011
FIGO stage	I+II	134	-	-	-	-	-	-	-	-	-	-
	III+IV	1183	0.34	0.28	0.42	<0.001	0.04	0.59	0.47	0.74	<0.001	0.121
Primary site	Ovary	1002	-	-	-	-	-	-	-	-	-	-
	FT	135	1.28	1.04	1.58	0.023	0.544	1.1	0.89	1.36	0.372	0.138
	Peritoneum	215	0.66	0.57	0.77	<0.001	0.872	0.82	0.71	0.94	0.006	0.836
Age at diagnosis	Years Spline 1	1370	0.99	0.98	1	0.069	0.082	1	0.99	1.01	0.625	0.188
	Years Spline 2		0.99	0.97	1	0.142	0.213	0.98	0.97	1	0.027	0.201
Surgery	Primary CS	980	-	-	-	-	-	-	-	-	-	-
	Interval CS	299	0.83	0.72	0.95	0.007	0.675	0.84	0.45	1.56	0.586	0.507
	Other	69	1.27	0.99	1.63	0.065	0.697	1.13	0.83	1.53	0.44	0.743
Neoadjuvant CHT	No	1048	-	-	-	-	-	-	-	-	-	-
	Yes	322	0.83	0.72	0.95	0.006	0.563	1	0.54	1.84	0.999	0.12
Grade	G2	237	-	-	-	-	-	-	-	-	-	-
	G3	1088	1.22	1.05	1.41	0.009	0.907	1.06	0.92	1.21	0.411	0.356
PARP inhibitor	No	1338	-	-	-	-	-	-	-	-	-	-
	Yes	39	1.4	0.92	2.12	0.119	0.347	1.24	0.8	1.92	0.332	0.524
Time ratios (TR) and 95% confidence intervals (CI) were estimated using a log-logistic AFT model. A TR > 1 indicates a longer survival time; a TR < 1 indicates shorter survival. P-values were derived from Wald tests. Interaction p-values indicate whether the association between each clinical feature and survival differs by BRCA status.
*Wald-test ** interaction with BRCA status
R=Residual disease, R0=No residual disease, G2=Grade 2, G3=Grade 3, OS=Overall survival, gBRCApv=pathogenic germline BRCA variant, TR=Time ratio, CI=confidence interval, CHT=chemotherapy, CS=cytoreductive surgery, FT=fallopian tube

## Sheet: Supplementary Table S4
Supplementary Table S4: Associations of clinical features with progression-free survival using univariable and multivariable Accelerated Failure Time (AFT) models.
			Univariable					Multivariable
				95%CI					95%CI
Feature	Factor	Number	TR	lower	upper	P-value *	P-value**	TR	lower	upper	P-value*	P-value**
BRCA-status	Non-carriers	1096	-	-	-	-	-	-	-	-	-	-
	gBRCApv-carriers	281	1.53	1.34	1.76	<0.001	-	1.34	1.28	1.53	<0.001	-
Residual disease	R0	461	-	-	-	-	-	-	-	-	-	-
	R	823	0.45	0.4	0.5	<0.001	0.109	0.57	0.5	0.64	<0.001	0.042
FIGO stage	I+II	134	-	-	-	-	-	-	-	-	-	-
	III+IV	1183	0.25	0.2	0.31	<0.001	0.195	0.41	0.33	0.52	<0.001	0.353
Primary site	Ovary	1002	-	-	-	-	-	-	-	-	-	-
	FT	135	1.27	1.04	1.54	0.019	0.359	1.01	0.84	1.22	0.902	0.021
	Peritoneum	215	0.65	0.57	0.75	<0.001	0.99	0.81	0.71	0.93	0.002	0.952
Age at diagnosis	Years Spline 1	1370	0.99	0.97	1	0.069	0.06	1	0.98	1.01	0.479	0.188
	Years Spline 2		1	0.99	1.02	0.797	0.149	1	0.99	1.01	0.949	0.201
Surgery	Primary CS	980	-	-	-	-	-	-	-	-	-	-
	Interval CS	299	0.74	0.65	0.83	<0.001	0.878	0.9	0.52	1.56	0.719	0.911
	Other	69	1.14	0.88	1.47	0.315	0.853	1.13	0.85	1.5	0.413	0.424
Neoadjuvant CHT	No	1048	-	-	-	-	-	-	-	-	-	-
	Yes	322	0.73	0.64	0.82	<0.001	0.678	0.83	0.49	1.42	0.501	0.512
Grade	G2	237	-	-	-	-	-	-	-	-	-	-
	G3	1088	1.24	1.07	1.43	0.004	0.431	1.04	0.91	1.28	0.565	0.361
PARP inhibitor	No	1338	-	-	-	-	-	-	-	-	-	-
	Yes	39	1.87	1.3	2.7	0.001	0.627	1.84	1.26	2.68	0.002	0.791
Time ratios (TR) and 95% confidence intervals (CI) were estimated using a log-logistic AFT model. A TR > 1 indicates a longer survival time; a TR < 1 indicates shorter survival. P-values were derived from Wald tests. Interaction p-values indicate whether the association between each clinical feature and survival differs by BRCA status.
*Wald-test ** interaction with BRCA status
R=Residual disease, R0=No residual disease, G2=Grade 2, G3=Grade 3, OS=Overall survival, gBRCApv=pathogenic germline BRCA variant, TR=Time ratio, CI=confidence interval, CHT=chemotherapy, CS=cytoreductive surgery, FT=fallopian tube

## Sheet: Supplementary Table S5
Supplementary Table S5 Distribution of molecular subtypes, tumor-infiltrating lymphocytes, RB1 protein expression status, and CCNE1 amplification status stratified by residual disease or no residual disease, and by gBRCApv carrier or non-carrier status. Percentages are given in parentheses and calculated within each subgroup.
		gBRCApv carriers & R (n, %)	gBRCApv carriers & R0 (n, %)	Non carriers & R (n, %)	Non carriers & R0 (n, %)
	Molecular Subtype	(n=48)	(n=56)	(n=132)	(n=129)
	C1.MES	15 (31.25%)	12 (21.43%)	48 (36.36%)	24 (18.60%)
	C2.IMM	9 (18.75%)	19 (33.93%)	28 (21.21%)	31 (24.03%)
	C4.DIF	21 (43.75%)	19 (33.93%)	31 (23.48%)	46 (35.66%)
	C5.PRO	3 (6.25%)	6 (10.71%)	25 (18.94%)	28 (21.71%)
	Number of TILs	(n=79)	(n=71)	(n=253)	(n=201)
	Negative	12 (15.19%)	4 (5.63%0	44 (17.39%)	30 (14.93%)
	Low	9 (11.39%)	14 (19.72%)	53 (20.95%)	29 (14.43%)
	Moderate	42 (53.16%)	36 (50.70%)	124 (49.01%)	104 (51.74%)
	High	16 (20.25%)	17 (33.15%)	32 (12.65%)	38 (18.91%)
	RB1	(n=44)	(n=55	(n=190)	(n=166)
	Retained	30 (68.18%)	25 (45.45%)	38 (20%)	38 (22.89%)
	Loss	14 (31.82%)	30 (54.55%)	152 (80%)	128 (77.11%)
	CCNE1	(n=47)	(n=49)	(n=205)	(n=174)
	No Amplification	0 (0%)	0 (0%)	181 (88.29%)	160 (91.95%)
	Amplification	47 (100%)	49 (100%)	24 (11.71%)	14 (8.05%)
	TILs= Tumor-infiltrating lymphcytes, R=Residual disease, R0=No residual disease, gBRCApv=pathogenic germline BRCA variant, C1.MES=C1 mesenchymal subtype, C2.IMM=C2 immunoreactive subtype, C4.DIF=C4 differentiated subtype, C5.PRO=C5 proliferative subtype

## Sheet: Supplementary Table S6
Supplementary Table S6 Univariable and multivariable Accelerated Failure Time (AFT) model of BRCA and neoadjuvant chemotherapy status and clinicopathological predictive features on overall survival in patients from the AOCS cohort. The model was fitted using a log-logistic distribution. Results are expressed as Time Ratios (TR) with corresponding 95% confidence intervals (CI) and p-values derived…
			Univariable				Multivariable
				95%CI				95%CI
Feature	Factor	Number	TR	lower	upper	P-value *	TR	lower	upper	P-value*
gBRCApv & NACT status	Non carriers & no NACT	828	-	-	-	-	-	-	-	-
	Non carriers & NACT	268	0.85	0.74	0.99	0.034	1.17	0.62	2.21	0.634
	gBRCApv carriers & no NACT	220	1.7	1.46	2	<0.001	1.6	1.37	1.87	<0.001
	gBRCApv carriers & NACT	54	1.32	0.99	1.75	0.06	1.39	0.75	2.6	0.298
Residual disease	R0	461	-	-	-	-	-	-	-	-
	R	823	0.46	0.41	0.52	<0.001	0.54	0.48	0.62	<0.001
FIGO stage	I+II	134	-	-	-	-	-	-	-	-
	III+IV	1183	0.34	0.28	0.42	<0.001	0.59	0.47	0.74	<0.001
Primary site	Ovary	1002	-	-	-	-	-	-	-	-
	FT	135	1.28	1.04	1.58	0.023	1.1	0.89	1.35	0.392
	Peritoneum	215	0.66	0.57	0.77	<0.001	0.81	0.7	0.94	0.005
Age at diagnosis	Years Spline 1	1370	0.99	0.98	1	0.069	1	0.99	1.01	0.694
	Years Spline 2		0.99	0.97	1	0.142	0.98	0.97	1	0.034
Surgery	Primary CS	980	-	-	-	-	-	-	-	-
	Interval CS	299	0.83	0.72	0.95	0.007	0.75	0.4	1.42	0.376
	Other	69	1.27	0.99	1.63	0.065	1.12	0.83	1.52	0.46
Grade	G2	237	-	-	-	-	-	-	-	-
	G3	1088	1.22	1.05	1.41	0.009	1.06	0.92	1.21	0.415
PARP inhibitor	No	1338	-	-	-	-	-	-	-	-
	Yes	39	1.4	0.92	2.12	0.119	1.28	0.82	1.98	0.273
*Wald-test
R=Residual disease, R0=No residual disease, G2=Grade 2, G3=Grade 3, OS=Overall survival, gBRCApv=pathogenic germline BRCA variant, TR=Time ratio, CI=confidence interval, NACT=Neoadjuvant chemotherapy, CS=cytoreductive surgery, FT=fallopian tube

## Sheet: Supplementary Table S7
Supplementary Table S7 Clinical data of the multi-omics cohort
Study ID	Sample Type	BRCA status	Progression status	Status	Overall survival (months)	Progression-free survival (months)	Survival group	Age at diagnosis (Years)	Primary site	Grade	FIGO stage	Residual disease	Neoadjuvant chemotherapy	Surgery	PARP inhibitor 1line
AOCS_001	Primary Tumour	methBRCA1	Dead	Dead	15.68	5	STS	53	Peritoneum	G3	IIIC	Residual disease	No	Primary cytoreductive surgery	No
AOCS_004	Primary Tumour	wildtype	Dead	Dead	6.05	1.84	STS	53	Ovary	G3	IIIC	Residual disease	No	Primary cytoreductive surgery	No
AOCS_005	Primary Tumour	wildtype	Dead	Dead	31.96	9.24	STS	51	Ovary	G3	IIIC	Residual disease	No	Primary cytoreductive surgery	No
AOCS_034	Primary Tumour	gBRCA1	Dead	Dead	55.86	17.4902	LTS	51.78	Ovary	G3	IIIC	Residual disease	No
AOCS_055	Primary Tumour	wildtype	Dead	Dead	22.49	10.39	STS	59	Ovary	G3	IIIC	Residual disease	No	Primary cytoreductive surgery	No
AOCS_056	Primary Tumour	wildtype	Dead	Dead	20.12	9.83	STS	72	Peritoneum	G3	IIIC	Residual disease	No	Primary cytoreductive surgery	No
AOCS_057	Primary Tumour	methBRCA1	Dead	Dead	22.65	6.48	STS	56	Ovary	G3	IIIC	Residual disease	No	Primary cytoreductive surgery	No
AOCS_058	Primary Tumour	gBRCA1	Dead	Dead	11.8	7.56156	STS	58.42	Ovary	G3	IIIC	Residual disease	No	Primary cytoreductive surgery	No
AOCS_059	Primary Tumour	wildtype	Dead	Dead	16.31	10.98	STS	76	Peritoneum	G3	IIIC	Residual disease	No	other	No
AOCS_060	Primary Tumour	wildtype	Dead	Dead	21.83	6.67	STS	69	Fallopian tube	G2	IV	Residual disease	No	Primary cytoreductive surgery	No
AOCS_061	Primary Tumour	wildtype	Dead	Dead	19.59	11.01	STS	59	Ovary	G3	IIIC	Residual disease	No	Primary cytoreductive surgery	No
AOCS_063	Primary Tumour	sBRCA2	Dead	Dead	20.25	11.01	STS	62	Peritoneum	G3	IIIC	Residual disease	No
AOCS_064	Primary Tumour	methBRCA1	Dead	Dead	45.96	12.2	LTS	67	Ovary	G3	IIIC	Residual disease	No	Primary cytoreductive surgery	No
AOCS_065	Primary Tumour	gBRCA1	Dead	Dead	21.11	12.9862	STS	46.27	Peritoneum	G3	IIIC	Residual disease	No	Primary cytoreductive surgery	No
AOCS_075	Primary Tumour	wildtype	Dead	Dead	39.02	10.36	LTS	53	Ovary	G3	IIIC	Residual disease	No	Primary cytoreductive surgery	No
AOCS_077	Primary Tumour	wildtype	Dead	Dead	29.13	4.93	STS	66	Peritoneum	G3	IIIC	Residual disease	Yes	Interval cytoreductive surgery	No
AOCS_078	Primary Tumour	wildtype	Dead	Dead	22.2573	7.36	STS	59.89	Ovary	G3	IIIA	No residual disease	No	Primary cytoreductive surgery	No
AOCS_079	Primary Tumour	sBRCA1	Dead	Dead	27.71	7.56	STS	72	Ovary	G3	IIIC	Residual disease	No	Primary cytoreductive surgery	No
AOCS_080	Primary Tumour	wildtype	Dead	Dead	29.95	9.93	STS	67	Ovary	G3	IIIC	No residual disease	No	Primary cytoreductive surgery	No
AOCS_081	Primary Tumour	wildtype	Dead	Dead	13.91	10.32	STS	59	Ovary	G3	IIIC	Residual disease	No	Primary cytoreductive surgery	No
AOCS_083	Primary Tumour	wildtype	Dead	Dead	57.83	11.05	LTS	58	Ovary	G3	IV	Residual disease	No	Primary cytoreductive surgery	No
AOCS_084	Primary Tumour	wildtype	Dead	Dead	53.88	5.33	LTS	60	Ovary	G3	IIIC	Residual disease	No	Primary cytoreductive surgery	No
AOCS_085	Primary Tumour	wildtype	Dead	Dead	26.5	11.05	STS	44	Ovary	G3	IIIC	Residual disease	No	Primary cytoreductive surgery	No
AOCS_086	Primary Tumour	sBRCA1	Dead	Dead	67.53	13.28	LTS	64	Fallopian tube	G3	IIIC	Residual disease	No
AOCS_088	Primary Tumour	gBRCA1	Dead	Dead	94.65	51.7145	LTS	56.53	Ovary	G3	IIIC	Residual disease	No	Primary cytoreductive surgery	No
AOCS_090	Primary Tumour	wildtype	Dead	Dead	56.78	27.09	LTS	53	Ovary	G3	IIIC	No residual disease	No	Primary cytoreductive surgery	No
AOCS_091	Primary Tumour	methBRCA1	Dead	Dead	43.59	21.96	LTS	39	Ovary	G3	IIIC	Residual disease	No	Primary cytoreductive surgery	No
AOCS_092	Primary Tumour	wildtype	Dead	Dead	46.32	17.13	LTS	68	Ovary	G3	IIIC	Residual disease	No	Primary cytoreductive surgery	No
AOCS_093	Primary Tumour	sBRCA2	Dead	Dead	47.01	23.57	LTS	57	Ovary	G3	IIIC	Residual disease	No	Primary cytoreductive surgery	No
AOCS_094	Primary Tumour	methBRCA1	Dead	Dead	28.77	21.63	STS	58.97	Ovary	G3	IIIB	Residual disease	No	Primary cytoreductive surgery	No
AOCS_095	Primary Tumour	gBRCA1	Dead	Dead	46.78	14.9587	LTS	50.59	Ovary	G3	IIIC	Residual disease	No	Primary cytoreductive surgery	No
AOCS_096	Primary Tumour	wildtype	Dead	Dead	10.22	8.02	STS	61	Peritoneum	G3	IV	Residual disease	No	Primary cytoreductive surgery	No
AOCS_097	Primary Tumour	wildtype	Dead	Dead	20.19	11.15	STS	55	Ovary	G3	IIIC	Residual disease	No	Primary cytoreductive surgery	No
AOCS_104	Primary Tumour	gBRCA2	Dead	Dead	38.2	9.20538	LTS	48.52	Peritoneum	G3	IIIC	Residual disease	No	Primary cytoreductive surgery	No
AOCS_105	Primary Tumour	gBRCA1	Dead	Dead	13.58	10.1259	STS	73.91	Ovary	G3	IIIC	No residual disease	No	Primary cytoreductive surgery	No
AOCS_106	Primary Tumour	sBRCA1	Dead	Dead	12.3	5.52	STS	64	Ovary	G2	IIIC	Residual disease	Yes	Interval cytoreductive surgery	No
AOCS_107	Primary Tumour	methBRCA1	Dead	Dead	20.65	10.65	STS	47	Ovary	G3	IIIC	Residual disease	No	other	No
AOCS_108	Primary Tumour	gBRCA1	Dead	Dead	34.16	10.0602	STS	61.22	Ovary	G3	IV	Residual disease	No	Primary cytoreductive surgery	No
AOCS_109	Primary Tumour	wildtype	Dead	Dead	19.17	11.47	STS	63	Ovary	G3	IIIC	Residual disease	No	Primary cytoreductive surgery	No
AOCS_111	Primary Tumour	wildtype	Dead	Dead	17.1	6.35	STS	65	Ovary	G3	IIIC	Residual disease	No	Primary cytoreductive surgery	No
AOCS_112	Primary Tumour	wildtype	Dead	Dead	23.64	9.67	STS	69	Peritoneum	G3	IIIC	Residual disease	No	Primary cytoreductive surgery	No
AOCS_113	Primary Tumour	wildtype	Dead	Dead	16.8	9.86	STS	77	Ovary	G2	IIIC	Residual disease	No	Primary cytoreductive surgery	No
AOCS_114	Primary Tumour	gBRCA1	Dead	Dead	22.68	9.00812	STS	55.28	Ovary	G3	IIIC	Residual disease	No	Primary cytoreductive surgery	No
AOCS_115	Primary Tumour	wildtype	Dead	Dead	16.08	7	STS	56	Ovary	G3	IIIC	Residual disease	No	Primary cytoreductive surgery	No
AOCS_116	Primary Tumour	wildtype	Dead	Dead	19.63	6.94	STS	63	Ovary	G3	IIIC	Residual disease	No	Primary cytoreductive surgery	No
AOCS_122	Primary Tumour	sBRCA2	Alive with no progression	Alive	123.81	123.81	LTS	58	Ovary	G3	IV	Residual disease	No	Primary cytoreductive surgery	No
AOCS_123	Primary Tumour	wildtype	Alive with no progression	Alive	133.21	96.66	LTS	55	Ovary	G3	IIIC	Residual disease	No	Primary cytoreductive surgery	No
AOCS_124	Primary Tumour	wildtype	Alive with no progression	Alive	140.81	140.81	LTS	58	Ovary	G2	IIIC	Residual disease	No	Primary cytoreductive surgery	No
AOCS_125	Primary Tumour	methBRCA1	Alive with no progression	Alive	143.44	86.66	LTS	54	Ovary	G3	IV	Residual disease	No	Primary cytoreductive surgery	No
AOCS_126	Primary Tumour	wildtype	Dead	Dead	81.01	52.11	LTS	58	Ovary	G3	IIIC	Residual disease	No	Primary cytoreductive surgery	No
AOCS_128	Primary Tumour	methBRCA1	Dead	Dead	21.5	13.31	STS	45	Ovary	G3	IIIC	Residual disease	No	Primary cytoreductive surgery	No
AOCS_130	Primary Tumour	sBRCA1	Dead	Dead	108.29	79.99	LTS	65	Ovary	G3	IIIC	Residual disease	No
AOCS_131	Primary Tumour	gBRCA1	Dead	Dead	125.36	40.0105	LTS	67.11	Ovary	G2	IV	Residual disease	No	Primary cytoreductive surgery	No
AOCS_132	Primary Tumour	wildtype	Dead	Dead	80.58	17.95	LTS	48	Ovary	G2	IIIC	Residual disease	No
AOCS_133	Primary Tumour	wildtype	Dead	Dead	106.09	20.55	LTS	66	Ovary	G3	IIIC	Residual disease	No
AOCS_139	Primary Tumour	gBRCA1	Dead	Dead	30.25	11.2437	STS	62.39	Ovary	G3	IV	Residual disease	No	Primary cytoreductive surgery	No
AOCS_143	Primary Tumour	gBRCA1	Dead	Dead	69.07	9.59989	LTS	49.73	Peritoneum	G3	IIIC	Residual disease	No	Primary cytoreductive surgery	No
AOCS_144	Primary Tumour	methBRCA1	Dead	Dead	61.91	21.73	LTS	54	Ovary	G3	IV	Residual disease	No	Primary cytoreductive surgery	No
AOCS_145	Primary Tumour	gBRCA1	Dead	Dead	100.34	10.3232	LTS	62.18	Ovary	G3	IIIC	Residual disease	No	Primary cytoreductive surgery	No
AOCS_146	Primary Tumour	gBRCA1	Alive with no progression	Alive	118.91	65.7527	LTS	52.12	Ovary	G3	IV	Residual disease	No	Primary cytoreductive surgery	No
AOCS_147	Primary Tumour	wildtype	Alive with no progression	Alive	201.83	201.83	LTS	55	Ovary	G3	IIIC	Residual disease	No
AOCS_148	Primary Tumour	wildtype	Alive with no progression	Alive	156.46	156.46	LTS	45	Ovary	G2	IIIC	Residual disease	No	Primary cytoreductive surgery	No
AOCS_149	Primary Tumour	sBRCA2	Dead	Dead	50.2	15.52	LTS	56	Ovary	G3	IIIC	Residual disease	No
AOCS_152	Primary Tumour	sBRCA1	Dead	Dead	62.1	20.71	LTS	73	Ovary	G3	IIIC	Residual disease	No
AOCS_153	Primary Tumour	gBRCA2	Dead	Dead	34.68	7.3643	STS	57.91	Ovary	G2	IIIC	Residual disease	No	other	No
AOCS_157	Primary Tumour	wildtype	Dead	Dead	9.4	6.61	STS	45	Peritoneum	G3	IV	Residual disease	No	Primary cytoreductive surgery	No
AOCS_158	Primary Tumour	methBRCA1	Dead	Dead	6.41	3.65	STS	52	Peritoneum	G3	IIIC	Residual disease	Yes	Interval cytoreductive surgery	No
AOCS_159	Primary Tumour	wildtype	Dead	Dead	22.13	6.35	STS	78	Peritoneum	G3	IIIC	Residual disease	No	Primary cytoreductive surgery	No
AOCS_160	Primary Tumour	wildtype	Dead	Dead	10.52	5.69	STS	66	Ovary	G2	IIIC	Residual disease	No	Primary cytoreductive surgery	No
AOCS_161	Primary Tumour	wildtype	Dead	Dead	7.99	4.96	STS	60	Peritoneum	G2	IIIC	Residual disease	No	Primary cytoreductive surgery	No
AOCS_163	Primary Tumour	wildtype	Dead	Dead	13.41	9.73	STS	65	Ovary	G3	IIIC	Residual disease	No
AOCS_164	Primary Tumour	methBRCA1	Dead	Dead	33.5	8.35	STS	55	Ovary	G3	IIIC	Residual disease	No
AOCS_165	Primary Tumour	wildtype	Dead	Dead	14.4	8.02	STS	74	Ovary	G3	IIIC	Residual disease	No
AOCS_168	Primary Tumour	wildtype	Dead	Dead	12.92	4.14	STS	59	Ovary	G3	IIIC	Residual disease	No
AOCS_169	Primary Tumour	wildtype	Dead	Dead	6.74	5.79	STS	74	Ovary	G3	IIIC	Residual disease	Yes
AOCS_170	Primary Tumour	wildtype	Alive with progression	Alive	62.5	14.7	LTS	72.77	Ovary	G3	IIIC	Residual disease	No	Primary cytoreductive surgery	No
AOCS_171	Primary Tumour	sBRCA1	Dead	Dead	24.13	13.02	STS	52	Ovary	G2	IIIC	Residual disease	No	Primary cytoreductive surgery	No
BRCA_1	Primary Tumour	gBRCA2	Dead	Dead	19.1998	18.2135	STS	57.5	Ovary	G3	IV	Residual disease	No	Primary cytoreductive surgery	No
BRCA_10	Primary Tumour	gBRCA1	Dead	Dead	35.2106	15.4848	STS	51.58	Ovary	G3	IIIC	Residual disease	No	Primary cytoreductive surgery	No
BRCA_11	Primary Tumour	gBRCA1	Dead	Dead	19.0025	17.6217	STS	66.11	Ovary	G3	IIIB	Residual disease	No	Primary cytoreductive surgery	No
BRCA_12	Primary Tumour	gBRCA1	Dead	Dead	22.06	9.89578	STS	48.56	Ovary	G3	IIIC	Residual disease	No	Primary cytoreductive surgery	No
BRCA_13	Primary Tumour	gBRCA2	Dead	Dead	25.6107	22.5203	STS	60.81	Ovary	G3	IIIC	No residual disease	No	Primary cytoreductive surgery	No
BRCA_14	Primary Tumour	gBRCA1	Dead	Dead	22.323	16.2738	STS	58.55	Ovary	G3	IIIC	Residual disease	No	Primary cytoreductive surgery	No
BRCA_15	Primary Tumour	gBRCA2	Dead	Dead	31.9229	17.819	STS	67.77	Peritoneum	G2	IV	Residual disease	No	Primary cytoreductive surgery	No
BRCA_16	Primary Tumour	gBRCA1	Dead	Dead	29.9504	9.66565	STS	44.92	Ovary	G3	IIIC	Residual disease	No	Primary cytoreductive surgery	No
BRCA_17	Primary Tumour	gBRCA1	Dead	Dead	21.4354	10.7506	STS	51.6	Peritoneum	G3	IIIC	Residual disease	No	Primary cytoreductive surgery	No
BRCA_18	Primary Tumour	gBRCA1	Dead	Dead	11.7369	10.4547	STS	64.3	Peritoneum	G3	IIIC	Residual disease	No	Primary cytoreductive surgery	No
BRCA_19	Primary Tumour	gBRCA1	Dead	Dead	33.3695	17.8847	STS	35.34	Ovary	G3	III	Residual disease	Yes	Primary cytoreductive surgery	No
BRCA_2	Primary Tumour	gBRCA1	Dead	Dead	26.2353	13.6437	STS	47	Ovary	G3	IIIC	No residual disease	No	Primary cytoreductive surgery	No
BRCA_20	Primary Tumour	gBRCA1	Dead	Dead	16.0437	11.6382	STS	52.82	Ovary	G3	III	No residual disease	No	Primary cytoreductive surgery	No
BRCA_21	Primary Tumour	gBRCA1	Dead	Dead	20.1861	11.3095	STS	51.91	Ovary	G2	IIIC	Residual disease	No	Primary cytoreductive surgery	No
BRCA_22	Primary Tumour	gBRCA1	Dead	Dead	31.8572	10.3561	STS	51.21	Ovary	G2	IIIC	Residual disease	No	Primary cytoreductive surgery	No
BRCA_23	Primary Tumour	gBRCA2	Dead	Dead	31.3312	10.6	STS		Fallopian tube	G3	IIIC	Residual disease	No		No
BRCA_24	Primary Tumour	gBRCA1	Dead	Dead	19.7916	9.07387	STS	40.56	Ovary	G3	IIIC	Residual disease	No	Primary cytoreductive surgery	No
BRCA_3	Primary Tumour	gBRCA2	Dead	Dead	31.8572	10.6519	STS	68.35	Ovary	G3	IIIC	Residual disease	No	Primary cytoreductive surgery	No
BRCA_4	Primary Tumour	gBRCA1	Dead	Dead	31.6928	10.6191	STS	51.5	Ovary	G3	IIIC	Residual disease	No	Primary cytoreductive surgery	No
BRCA_5	Primary Tumour	gBRCA2	Dead	Dead	32.3503	10.5862	STS	74.84	Fallopian tube	G3	IIIC	No residual disease	No	Primary cytoreductive surgery	No
BRCA_6	Primary Tumour	gBRCA1	Dead	Dead	27.7805	8.51498	STS	57.48	Ovary	G2	IIIC	Residual disease	No	Primary cytoreductive surgery	No
BRCA_7	Primary Tumour	gBRCA2	Dead	Dead	30.3449	9.86291	STS	44.06	Fallopian tube	G2	IIIC	Residual disease	No	Primary cytoreductive surgery	No
BRCA_8	Primary Tumour	gBRCA1	Dead	Dead	23.2436	12.6245	STS	68.29	Ovary	G3	IIIA	No residual disease	No	Primary cytoreductive surgery	No
BRCA_9	Primary Tumour	gBRCA2	Dead	Dead	33.6983	10.6519	STS	53.57	Ovary	G2	IIIC	Residual disease	No	Primary cytoreductive surgery	No
MAOC00037	Primary Tumour	sBRCA1	Dead	Dead	124.77	15.52	LTS	40	Ovary	G2	IV	Residual disease	No	Primary cytoreductive surgery	No
MAOC00287	Primary Tumour	gBRCA1	Alive with no progression	Alive	142.2	142.453	LTS	55.54	Ovary	G3	IIIC	Residual disease	No	Primary cytoreductive surgery	No
MAOC00357	Primary Tumour	sBRCA2	Alive with no progression	Alive	161.4	161.4	LTS	59	Ovary	G3	IIIC	Residual disease	No	Primary cytoreductive surgery	No
MAOC00562	Primary Tumour	wildtype	Alive with progression	Alive	138.75	6.24	LTS	64	Peritoneum	G3	IIIC	No residual disease	No	Primary cytoreductive surgery	No
MAOC00602	Primary Tumour	wildtype	Alive with no progression	Alive	126.68	126.68	LTS	59	Ovary	G2	IIIC	No residual disease	No	Primary cytoreductive surgery	No
MAOC00623	Primary Tumour	wildtype	Dead	Dead	131.24	80.86	LTS	76	Ovary	G3	IIIC	No residual disease	No	Primary cytoreductive surgery	No
MAOC00665	Primary Tumour	methBRCA1	Dead	Dead	124.97	16.54	LTS	60	Ovary	G3	IIIC	Residual disease	No	Primary cytoreductive surgery	No
MAOC00673	Primary Tumour	gBRCA2	Dead	Dead	134.13	20.0217	LTS	55.62	Ovary	G3	IIIC	Residual disease	No	Primary cytoreductive surgery	No
MAOC00682	Primary Tumour	wildtype	Alive with no progression	Alive	131.21	131.21	LTS	67	Peritoneum	G3	IIIC	Residual disease	No	Primary cytoreductive surgery	No
MAOC00944	Primary Tumour	gBRCA1	Alive with progression	Alive	132.36	41.9831	LTS	46.13	Ovary	G3	IIIC	No residual disease	No	Primary cytoreductive surgery	No
MAOC01064	Primary Tumour	gBRCA1	Alive with progression	Alive	133.47	63.7144	LTS	57.84	Ovary	G2	IV	Residual disease	No	Primary cytoreductive surgery	No
MAOC01138	Primary Tumour	sBRCA1	Alive with progression	Alive	123.59	26.85	LTS	58	Ovary	G3	IIIC	No residual disease	No	Primary cytoreductive surgery	No
MAOC01262	Primary Tumour	gBRCA1	Alive with progression	Alive	124.02	118.947	LTS	54.55	Ovary	G3	IIIC	Residual disease	No	Primary cytoreductive surgery	No
MAOC01315	Primary Tumour	methBRCA1	Alive with no progression	Alive	134.59	134.59	LTS	52	Ovary	G3	IIIC	Residual disease	No	Primary cytoreductive surgery	No
MAOC01370	Primary Tumour	gBRCA2	Alive with no progression	Alive	122.97	123.188	LTS	58.96	Ovary	G3	IIIC	Residual disease	No	Primary cytoreductive surgery	No
MAOC01475	Primary Tumour	gBRCA1	Alive with no progression	Alive	129.57	130.355	LTS	48.71	Ovary	G2	IIIC	Residual disease	No	Primary cytoreductive surgery	No
MAOC01491	Primary Tumour	gBRCA2	Alive with progression	Alive	143.28	17.6875	LTS	61.95	Ovary	G3	IIIC	Residual disease	No	Primary cytoreductive surgery	No
MAOC01783	Primary Tumour	gBRCA1	Dead	Dead	125.43	18.2464	LTS	64.38	Ovary	G3	IIIC	Residual disease	No	Primary cytoreductive surgery	No
MAOC01847	Primary Tumour	wildtype	Alive with no progression	Alive	136.33	136.33	LTS	73	Ovary	G3	IIIC	No residual disease	No	Primary cytoreductive surgery	No
MAOC01893	Primary Tumour	sBRCA1	Alive with progression	Alive	129.3	35.87	LTS	64	Ovary	G2	IIIC	Residual disease	No	Primary cytoreductive surgery	No
MAOC02145	Primary Tumour	wildtype	Alive with no progression	Alive	128.25	128.25	LTS	61	Ovary	G3	IIIC	Residual disease	No	Primary cytoreductive surgery	No
MAOC02193	Primary Tumour	wildtype	Alive with no progression	Alive	122.08	122.08	LTS	69	Ovary	G3	IIIC	Residual disease	No	Primary cytoreductive surgery	No
MAOC02278	Primary Tumour	wildtype	Dead	Dead	126.61	44.11	LTS	69	Ovary	G3	IIIC	Residual disease	No	Primary cytoreductive surgery	No
MAOC02394	Primary Tumour	wildtype	Alive with progression	Alive	120.84	52.67	LTS	69	Peritoneum	G3	IIIC	Residual disease	No	other	No
MAOC02410	Primary Tumour	gBRCA1	Alive with no progression	Alive	139.77	140.02	LTS	45.08	Peritoneum	G3	IIIC	No residual disease	No	Primary cytoreductive surgery	No
MAOC02417	Primary Tumour	wildtype	Alive with no progression	Alive	127.4	127.4	LTS	56	Ovary	G3	IIIC	Residual disease	No	Primary cytoreductive surgery	No
MAOC02427	Primary Tumour	wildtype	Alive with no progression	Alive	120.57	120.57	LTS	67	Ovary	G3	IV	Residual disease	No	Primary cytoreductive surgery	No
MAOC02444	Primary Tumour	methBRCA1	Alive with progression	Alive	122.74	88.35	LTS	67	Peritoneum	G3	IV	Residual disease	No	Primary cytoreductive surgery	No
MAOC02541	Primary Tumour	gBRCA1	Alive with no progression	Alive	142.66	142.914	LTS	70.76	Ovary	G3	IIIC	Residual disease	No	Primary cytoreductive surgery	No
MMAC00102	Primary Tumour	gBRCA2	Alive with no progression	Alive	139.71	139.956	LTS	66	Peritoneum	G3	IIIC	No residual disease	No		No
MMAY00010	Primary Tumour	wildtype	Alive with progression	Alive	185.65	34.2	LTS	64	Ovary	G3	IIIC		No
MMAY00149	Primary Tumour	wildtype	Alive with progression	Alive	159.33	88.18	LTS	71	Ovary	G3	IV	No residual disease	No
MMAY00176	Primary Tumour	wildtype	Alive with no progression	Alive	179.51	179.51	LTS	64	Ovary	G3	IIIC	Residual disease	No
MMAY00363	Primary Tumour	gBRCA2	Dead	Dead	126.51	23.211	LTS	81	Ovary	G3	IIIC	Residual disease	No		No
MMAY00507	Primary Tumour	gBRCA2	Dead	Dead	178.4	31.6274	LTS	55	Ovary	G3	IV	Residual disease	No		No
MMAY00566	Primary Tumour	wildtype	Dead	Dead	165.63	5.61	LTS	57	Ovary	G3	IV	Residual disease	No
MMAY00594	Primary Tumour	wildtype	Dead	Dead	142.5	65.47	LTS	70	Ovary	G3	IIIC	No residual disease	No
MMAY00621	Primary Tumour	sBRCA1	Alive with progression	Alive	181.06	12.27	LTS	61	Ovary	G3	IIIC	No residual disease	No
MMAY00627	Primary Tumour	sBRCA2	Alive with no progression	Alive	185.75	185.75	LTS	60	Ovary	G3	IIIC	Residual disease	No
MMAY00631	Primary Tumour	gBRCA1	Alive with no progression	Alive	179.58	179.901	LTS	61	Peritoneum	G3	IIIC	Residual disease	No		No
MMAY00711	Primary Tumour	gBRCA2	Dead	Dead	143.02	25.0521	LTS	50	Ovary	G3	IIIC	Residual disease	No		No
MMAY00738	Primary Tumour	wildtype	Dead	Dead	140.13	16.54	LTS	33	Ovary	G3	IIIC	No residual disease	No
MMAY00753	Primary Tumour	gBRCA2	Alive with no progression	Alive	157.43	157.71	LTS	62	Ovary	G3	IIIC	Residual disease	No		No
MMAY00758	Primary Tumour	sBRCA1	Dead	Dead	133.34	133.34	LTS	70	Ovary	G3	IIIC	No residual disease	No
MMAY00761	Primary Tumour	wildtype	Alive with no progression	Alive	153.59	153.59	LTS	67	Ovary	G3	IIIC		No
MMAY00981	Primary Tumour	sBRCA1	Alive with progression	Alive	201.9	70.53	LTS	60	Peritoneum	G3	IIIC	Residual disease	No
MWMH00083	Primary Tumour	gBRCA2	Dead	Dead	203.5	203.868	LTS	67	Ovary	G2	IIIB	Residual disease	No	Primary cytoreductive surgery	No
MWMH00351	Primary Tumour	gBRCA1	Alive with no progression	Alive	247.5	296.844	LTS	52.73	Ovary	G2	IIIC	Residual disease	No	Primary cytoreductive surgery	No
MWMH00475	Primary Tumour	methBRCA1	Dead	Dead	120.02	106.46	LTS	46	Ovary	G3	IIIC	Residual disease	No	Primary cytoreductive surgery	No
MWMH00507	Primary Tumour	gBRCA1	Alive with no progression	Alive	160.9	254.4	LTS	56.25	Ovary	G3	IIIC	Residual disease	No	Primary cytoreductive surgery	No
MWMH00552	Primary Tumour	sBRCA1	Dead	Dead	179.81	161.76	LTS	58	Fallopian tube	G3	IIIC	Residual disease	No	Primary cytoreductive surgery	No
MWMH00758	Primary Tumour	wildtype	Dead	Dead	151.98	73.3	LTS	68	Ovary	G3	IIIC	Residual disease	No	Primary cytoreductive surgery	No
MWMH00851	Primary Tumour	gBRCA1	Alive with no progression	Alive	132.6	153.337	LTS	29	Ovary	G3	IV	Residual disease	No	Primary cytoreductive surgery	No
gBRCA=pathogenic germline BRCA variation, sBRCA= pathogenic somatic BRCA variation, methBRCA1=hypermethylated BRCA1, STS=Short term survivor, LTS=Long term survivor

## Sheet: Supplementary Table S8
Supplementary Table S8 Mutation location with d11q proportion and d11q BRCA1 expression.
Study ID	HRD SUM score	BRCA status	BRCA1 RNA expression	BRCA exon location	Junction total counts	Δ11q junction proportion	Δ11q exon counts	Last exon counts	All other exon counts	BRCA1 Δ11q expression
AOCS_001	65	methBRCA1	2.77853	BRCA wildtype	21	0.190476	38	216	967	0.529243
AOCS_004	33	wildtype	4.59025	BRCA wildtype	72	0.138889	141	819	4425	0.637534
AOCS_005	54	wildtype	4.74552	BRCA wildtype	124	0.112903	185	1823	7302	0.535785
AOCS_034	76	gBRCA1	4.0709	BRCA1 other	19	0.105263	32	1116	2073	0.428515
AOCS_055	50	wildtype	4.27921	BRCA wildtype	18	0.277778	59	697	2210	1.18867
AOCS_057	71	methBRCA1	4.34156	BRCA wildtype	71	0.056338	105	1348	4870	0.244595
AOCS_059	32	wildtype	4.56168	BRCA wildtype	54	0.0925926	68	1022	3473	0.422378
AOCS_060	48	wildtype	5.63792	BRCA wildtype	141	0.120567	217	2172	9617	0.679749
AOCS_061	28	wildtype	4.07997	BRCA wildtype	36	0.194444	47	496	2181	0.793327
AOCS_063	48	sBRCA2	3.96149	BRCA2 Exon 11	33	0.242424	71	484	2211	0.96036
AOCS_065	58	gBRCA1	2.48425	BRCA1 other	16	0.125	30	191	996	0.310531
AOCS_075	48	wildtype	4.1662	BRCA wildtype	53	0.207547	83	652	2724	0.864684
AOCS_077	53	wildtype	3.34106	BRCA wildtype	8	0.25	11	669	416	0.835266
AOCS_079	67	sBRCA1	3.56416	BRCA1 Exon 10	40	0.3	54	592	1775	1.06925
AOCS_081	50	wildtype	5.07368	BRCA wildtype	104	0.211538	151	1569	5493	1.07328
AOCS_083	36	wildtype	3.747	BRCA wildtype	38	0.0526316	21	799	1625	0.19721
AOCS_084	39	wildtype	4.4459	BRCA wildtype	76	0.0921053	110	987	4191	0.409491
AOCS_085	27	wildtype	4.01392	BRCA wildtype	23	0.130435	21	1188	1980	0.523555
AOCS_088	89	gBRCA1	4.8512	BRCA1 other	42	0.0952381	40	2918	2971	0.462019
AOCS_090	51	wildtype	4.09125	BRCA wildtype	26	0.115385	20	1629	1743	0.472068
AOCS_092	41	wildtype	3.02818	BRCA wildtype	25	0.16	36	480	1327	0.484509
AOCS_096	37	wildtype	4.77581	BRCA wildtype	54	0.111111	117	819	4069	0.530646
AOCS_097	6	wildtype	3.35983	BRCA wildtype	24	0.25	38	425	1194	0.839957
AOCS_104	45	gBRCA2	4.19055	BRCA2 other	43	0.116279	46	724	2783	0.487273
AOCS_105	63	gBRCA1	3.79857	BRCA1 Exon 10	30	0.0333333	47	774	2029	0.126619
AOCS_108	72	gBRCA1	4.09338	BRCA1 Exon 10	19	0.473684	25	1636	1474	1.93897
AOCS_109	41	wildtype	4.95258	BRCA wildtype	97	0.0515464	135	1173	4844	0.255288
AOCS_111	20	wildtype	4.2586	BRCA wildtype	40	0.125	50	833	2495	0.532325
AOCS_112	45	wildtype	4.17734	BRCA wildtype	49	0.0612245	29	891	2191	0.255755
AOCS_114	68	gBRCA1	4.57995	BRCA1 other	70	0.0714286	115	822	4035	0.327139
AOCS_115	42	wildtype	6.06341	BRCA wildtype	119	0.0672269	178	3696	9388	0.407624
AOCS_116	56	wildtype	3.44047	BRCA wildtype	12	0.0833333	16	826	1230	0.286706
AOCS_122	61	sBRCA2	5.47383	BRCA2 Exon 11	39	0.102564	30	2710	2287	0.561418
AOCS_123	34	wildtype	4.14604	BRCA wildtype	41	0.219512	67	1121	2666	0.910106
AOCS_124	56	wildtype	4.95558	BRCA wildtype	69	0.0869565	99	1332	4810	0.43092
AOCS_126	57	wildtype	4.68194	BRCA wildtype	53	0.358491	58	1539	3194	1.67843
AOCS_128	78	methBRCA1	3.08809	BRCA wildtype	19	0.0526316	18	425	1362	0.162531
AOCS_131	73	gBRCA1	6.07732	BRCA1 other	173	0.0867052	178	4543	9859	0.526935
AOCS_133	60	wildtype	4.53002	BRCA wildtype	70	0.114286	53	1455	3166	0.517717
AOCS_139	84	gBRCA1	3.35992	BRCA1 other	29	0.0689655	18	886	1544	0.231719
AOCS_143	61	gBRCA1	2.82446	BRCA1 Exon 10	22	0.227273	38	349	1311	0.641923
AOCS_146	77	gBRCA1	3.21967	BRCA1 Exon 10	23	0.0869565	21	632	1261	0.279971
AOCS_147	71	wildtype	4.14807	BRCA wildtype	58	0.0517241	15	1431	2221	0.214555
AOCS_148	46	wildtype	4.20428	BRCA wildtype	40	0.125	57	1387	2793	0.525535
AOCS_149	82	sBRCA2	4.58508	BRCA2 Exon 11	19	0.105263	22	1622	1556	0.48264
AOCS_157	43	wildtype	4.62408	BRCA wildtype	72	0.0694444	72	1730	4252	0.321117
AOCS_158	81	methBRCA1	4.57887	BRCA wildtype	71	0.0704225	80	1513	4198	0.322456
AOCS_159	49	wildtype	5.11109	BRCA wildtype	66	0.287879	91	1609	4342	1.47137
AOCS_160	44	wildtype	5.09482	BRCA wildtype	89	0.11236	113	2143	5044	0.572452
AOCS_161	56	wildtype	5.27485	BRCA wildtype	99	0.0808081	181	1184	6328	0.42625
AOCS_165	38	wildtype	4.90302	BRCA wildtype	83	0.337349	159	1075	5037	1.65403
AOCS_168	35	wildtype	4.33522	BRCA wildtype	59	0.0847458	47	1377	3109	0.367391
AOCS_169	46	wildtype	5.12916	BRCA wildtype	65	0.107692	53	3343	4527	0.552371
AOCS_170	40	wildtype	3.88535	BRCA wildtype	51	0.156863	76	595	2693	0.609467
AOCS_171	57	sBRCA1	4.07405	BRCA1 other	1	0	32	70	770	0
BRCA_1	49	gBRCA2	5.01077	BRCA2 Exon 11	135	0.0888889	125	1830	6348	0.445402
BRCA_10	44	gBRCA1	2.1885	BRCA1 Exon 10	31	0.258065	19	220	1043	0.564774
BRCA_11	84	gBRCA1	4.79772	BRCA1 other	70	0.228571	29	2690	3972	1.09662
BRCA_13	90	gBRCA2	4.37556	BRCA2 other	84	0.154762	148	1020	5099	0.677171
BRCA_14	95	gBRCA1	3.7747	BRCA1 Exon 10	61	0.540984	124	890	3461	2.04205
BRCA_15	69	gBRCA2	2.91814	BRCA2 Exon 11	13	0	13	1151	715	0
BRCA_16	72	gBRCA1	5.17339	BRCA1 other	54	0.0925926	14	4437	1911	0.479018
BRCA_18	49	gBRCA1	3.09057	BRCA1 Exon 10	35	0.228571	34	471	1882	0.706416
BRCA_19	59	gBRCA1	4.13932	BRCA1 other	53	0.169811	48	894	3225	0.702904
BRCA_2	43	gBRCA1	3.24466	BRCA1 Exon 10	52	0.153846	46	397	2283	0.499178
BRCA_20	94	gBRCA1	3.73317	BRCA1 other	66	0.136364	56	597	2758	0.509068
BRCA_21	73	gBRCA1	4.45929	BRCA1 other	79	0.0506329	86	859	4655	0.225787
BRCA_22	76	gBRCA1	3.38782	BRCA1 Exon 10	43	0.139535	58	906	2689	0.472719
BRCA_23	74	gBRCA2	4.85069	BRCA2 other	112	0.142857	156	1382	6915	0.692955
BRCA_24	47	gBRCA1	3.7911	BRCA1 other	90	0.0111111	55	1257	3651	0.0421233
BRCA_3	65	gBRCA2	4.97596	BRCA2 other	117	0.136752	106	2555	6268	0.680474
BRCA_4	86	gBRCA1	4.25527	BRCA1 Exon 10	81	0.246914	121	846	3911	1.05069
BRCA_6	78	gBRCA1	4.2916	BRCA1 Exon 10	65	0.338462	131	971	4619	1.45254
BRCA_7	47	gBRCA2	4.02795	BRCA2 Exon 11	96	0	61	830	3515	0
BRCA_8	72	gBRCA1	3.69192	BRCA1 other	48	0.208333	25	1456	2440	0.769151
BRCA_9	27	gBRCA2	3.43926	BRCA2 Exon 11	66	0.227273	70	448	2298	0.78165
MAOC00037	64	sBRCA1	3.22018	BRCA1 other	44	0.0681818	55	631	2404	0.219558
MAOC00287	91	gBRCA1	3.67232	BRCA1 Exon 10	57	0.140351	95	774	3717	0.515413
MAOC00357	94	sBRCA2	4.2239	BRCA2 Exon 11	66	0.121212	54	1941	3701	0.511988
MAOC00562	52	wildtype	4.44931	BRCA wildtype	146	0.0890411	161	1345	6818	0.396172
MAOC00602	49	wildtype	2.85614	BRCA wildtype	40	0.125	58	632	2730	0.357018
MAOC00623	59	wildtype	4.20222	BRCA wildtype	102	0.176471	120	1215	5748	0.741569
MAOC00673	98	gBRCA2	3.8901	BRCA2 Exon 11	79	0.0759494	94	1263	5886	0.29545
MAOC00682	39	wildtype	4.14638	BRCA wildtype	89	0.0449438	126	887	5228	0.186354
MAOC00944	81	gBRCA1	4.10961	BRCA1 other	110	0.0363636	151	1076	6035	0.14944
MAOC01064	85	gBRCA1	2.35982	BRCA1 Exon 10	26	0.0384615	34	450	1204	0.0907623
MAOC01315	78	methBRCA1	1.60558	BRCA wildtype	12	0.25	19	195	938	0.401396
MAOC01370	64	gBRCA2	4.06517	BRCA2 other	103	0.038835	34	1660	4499	0.157871
MAOC01475	64	gBRCA1	2.65299	BRCA1 Exon 10	32	0.09375	22	535	1590	0.248718
MAOC01491	66	gBRCA2	4.73111	BRCA2 other	99	0.040404	110	1560	5838	0.191156
MAOC01783	88	gBRCA1	3.07295	BRCA1 other	0	0	32	1192	1655	0
MAOC01847	39	wildtype	2.7958	BRCA wildtype	13	0.153846	16	981	1160	0.430122
MAOC01893	69	sBRCA1	2.88301	BRCA1 other	31	0	86	676	3168	0
MAOC02145	46	wildtype	3.79056	BRCA wildtype	59	0.152542	28	1939	2894	0.578221
MAOC02278	43	wildtype	3.68949	BRCA wildtype	98	0.153061	84	1208	4132	0.564717
MAOC02394	40	wildtype	2.89997	BRCA wildtype	11	0	28	1027	1367	0
MAOC02410	88	gBRCA1	4.20902	BRCA1 Exon 10	37	0.0540541	20	1491	1631	0.227515
MAOC02417	44	wildtype	2.414	BRCA wildtype	8	0	16	911	711	0
MAOC02427	27	wildtype	3.32981	BRCA wildtype	31	0	17	1265	1465	0
MAOC02541	78	gBRCA1	3.69039	BRCA1 Exon 10	28	0.357143	60	1265	2404	1.318
MMAC00102	76	gBRCA2	4.39232	BRCA2 other	119	0.0588235	95	1183	5433	0.258372
MMAY00010	47	wildtype	4.60091	BRCA wildtype	121	0.165289	162	1299	6888	0.760481
MMAY00149	44	wildtype	3.49211	BRCA wildtype	38	0.131579	57	602	3178	0.459488
MMAY00176	92	wildtype	4.32654	BRCA wildtype	59	0.0847458	100	1505	5055	0.366656
MMAY00363	65	gBRCA2	4.52411	BRCA2 Exon 11	120	0.108333	167	1550	7597	0.490112
MMAY00507	81	gBRCA2	4.93647	BRCA2 Exon 11	109	0.110092	151	2361	8394	0.543465
MMAY00594	81	wildtype	4.14676	BRCA wildtype	76	0.131579	142	1060	5715	0.545626
MMAY00621	78	sBRCA1	4.35018	BRCA1 other	111	0.036036	136	1357	6538	0.156763
MMAY00627	46	sBRCA2	3.41678	BRCA2 other	42	0.047619	67	807	2889	0.162704
MMAY00631	61	gBRCA1	4.06189	BRCA1 other	90	0.0444444	140	1047	5559	0.180528
MMAY00711	69	gBRCA2	3.43765	BRCA2 Exon 11	38	0.131579	45	813	2485	0.452322
MMAY00738	65	wildtype	4.51788	BRCA wildtype	158	0.101266	200	1512	7499	0.457506
MMAY00753	64	gBRCA2	4.24243	BRCA2 other	115	0.026087	131	1832	6210	0.110672
MMAY00758	84	sBRCA1	4.81241	BRCA1 other	176	0.0965909	242	2022	10078	0.464836
MMAY00761	50	wildtype	4.71281	BRCA wildtype	217	0.110599	248	3510	13458	0.521233
MMAY00981	73	sBRCA1	3.56438	BRCA1 Exon 10	44	0.0909091	36	851	1752	0.324034
MWMH00083	54	gBRCA2	4.22468	BRCA2 Exon 11	86	0.0697674	148	1125	6152	0.294745
MWMH00351	80	gBRCA1	2.82187	BRCA1 Exon 10	42	0.452381	86	481	2398	1.27656
MWMH00507	71	gBRCA1	4.00892	BRCA1 other	76	0.394737	149	985	4904	1.58247
MWMH00552	74	sBRCA1	3.93708	BRCA1 other	77	0.0779221	131	1059	4759	0.306785
MWMH00758	65	wildtype	4.09519	BRCA wildtype	102	0.0980392	109	835	4453	0.401489
MWMH00851	94	gBRCA1	3.02678	BRCA1 other	47	0.148936	49	480	2283	0.450797
HRD=Homologous recombination deficiency, gBRCA=pathogenic germline BRCA variation, sBRCA= pathogenic somatic BRCA variation, methBRCA1=hypermethylated BRCA1

## Sheet: Supplementary Table S9
Supplementary Table S9 Results of the Kaplan–Meier analysis of overall survival in 154 patients with HGSC from the multi-omics cohort stratified by the main features of interest.
	Feature	Factor	number	median OS	0.95LCL	0.95UCL
	BRCA location	BRCAwt	57	3.86	1.87	11.7
		BRCA1 Exon 10 Δ11q high	10	2.74	2.31	NA
		BRCA1 Exon 10 Δ11q low	9	NA	2.65	NA
		BRCA1 non Exon 10	24	6.27	2.5	NA
		BRCA2 Exon 11	13	10.54	2.66	NA
		BRCA2 non Exon 11	10	3.18	2.65	NA
	BRCA & HR status	BRCA1High	56	6.76	3.63	11.11
		BRCA1Low	15	2.01	1.76	5.76
		BRCA2High	20	11.88	10.54	NA
		BRCA2Low	14	6.73	2.89	NA
		BRCA-P-Low	49	2.21	1.68	4.82
	HR-deficiency	High (≥63)	76	10	4.66	11.88
		Low (≤41)	25	2.5	1.63	NA
		Moderate (42-62)	53	2.66	1.87	5.76
	Cibersort clusters	IMMB.1	30	14.87	6.75	NA
		IMMB.2	33	3.25	1.97	10.41
		IMMB.3	27	2.61	2.13	6.71
		IMMB.4	14	2.73	1.89	NA
		IMMB.5	24	2.03	1.82	2.93
		IMMB.6	25	10.45	5.63	11.92
	NF1	NF1 alteration	23	11.92	3.18	NA
		wildtype	63	5.17	2.89	10
	NF1 & BRCA	BRCA1 & NF1	12	7.16	1.94	NA
		BRCA1 only	59	3.92	2.65	10
		BRCA2 & NF1	11	16.96	11.92	NA
		BRCA2 only	23	8.84	2.89	NA
	PIK3CA & BRCA	BRCA-P / no PIK3CA amp	38	2.09	1.68	4.82
		BRCA-P / PIK3CA amp	11	3.86	1.6	NA
		BRCA1 / no PIK3CA amp	63	3.9	2.64	10
		BRCA1 / PIK3CA amp	8	8.37	3.63	NA
		BRCA2 / no PIK3CA amp	25	11.92	6.75	NA
		BRCA2 / PIK3CA amp	9	2.89	1.6	NA
	RAD21 & BRCA	BRCA-P / no RAD21 amp	43	1.87	1.64	4.49
		BRCA-P / RAD21 amp	6	NA	4.82	NA
		BRCA1 / no RAD21 amp	52	2.89	2.31	10.45
		BRCA1 / RAD21 amp	19	5.63	3.83	NA
		BRCA2 / no RAD21 amp	25	11.43	6.75	NA
		BRCA2 / RAD21 amp	9	2.89	2.65	NA
	c-KIT all	High	77	2.65	2.31	5.76
		Low	76	9.02	4.18	12.66
	c-KIT BRCA-deficient	High	52	2.73	2.4	8.84
		Low	52	10.41	5.17	14.87
	T cells CD8+ PD1+ epithelial	High	72	5.76	4.65	10.45
		Low	71	4.73	3.95	7.17
	OS=Overall survival, LCL=Lower Confidence Limit, UCL=Upper Confidence Limit, HR-deficiency=Homologous recombination deficiency, BRCAwt= BRCA wildtype, amp=amplification, BRCA-P=BRCA-proficient

[truncated: 13 more sheets: Supplementary Table S10, Supplementary Table S11, Supplementary Table S12, Supplementary Table S13, Supplementary Table S14, Supplementary Table S15, Supplementary Table S16, Supplementary Table S17, Supplementary Table S18, Supplementary Table S19, Supplementary Table S20, Supplementary Table S21, Supplementary Table S22]
